# Supplementary material for: Inferring RNA-binding protein target preferences using adversarial domain adaptation
Source: PubMed Central journal article supplement (PMC8870515; doi:10.1371/journal.pcbi.1009863), 2022-02-24

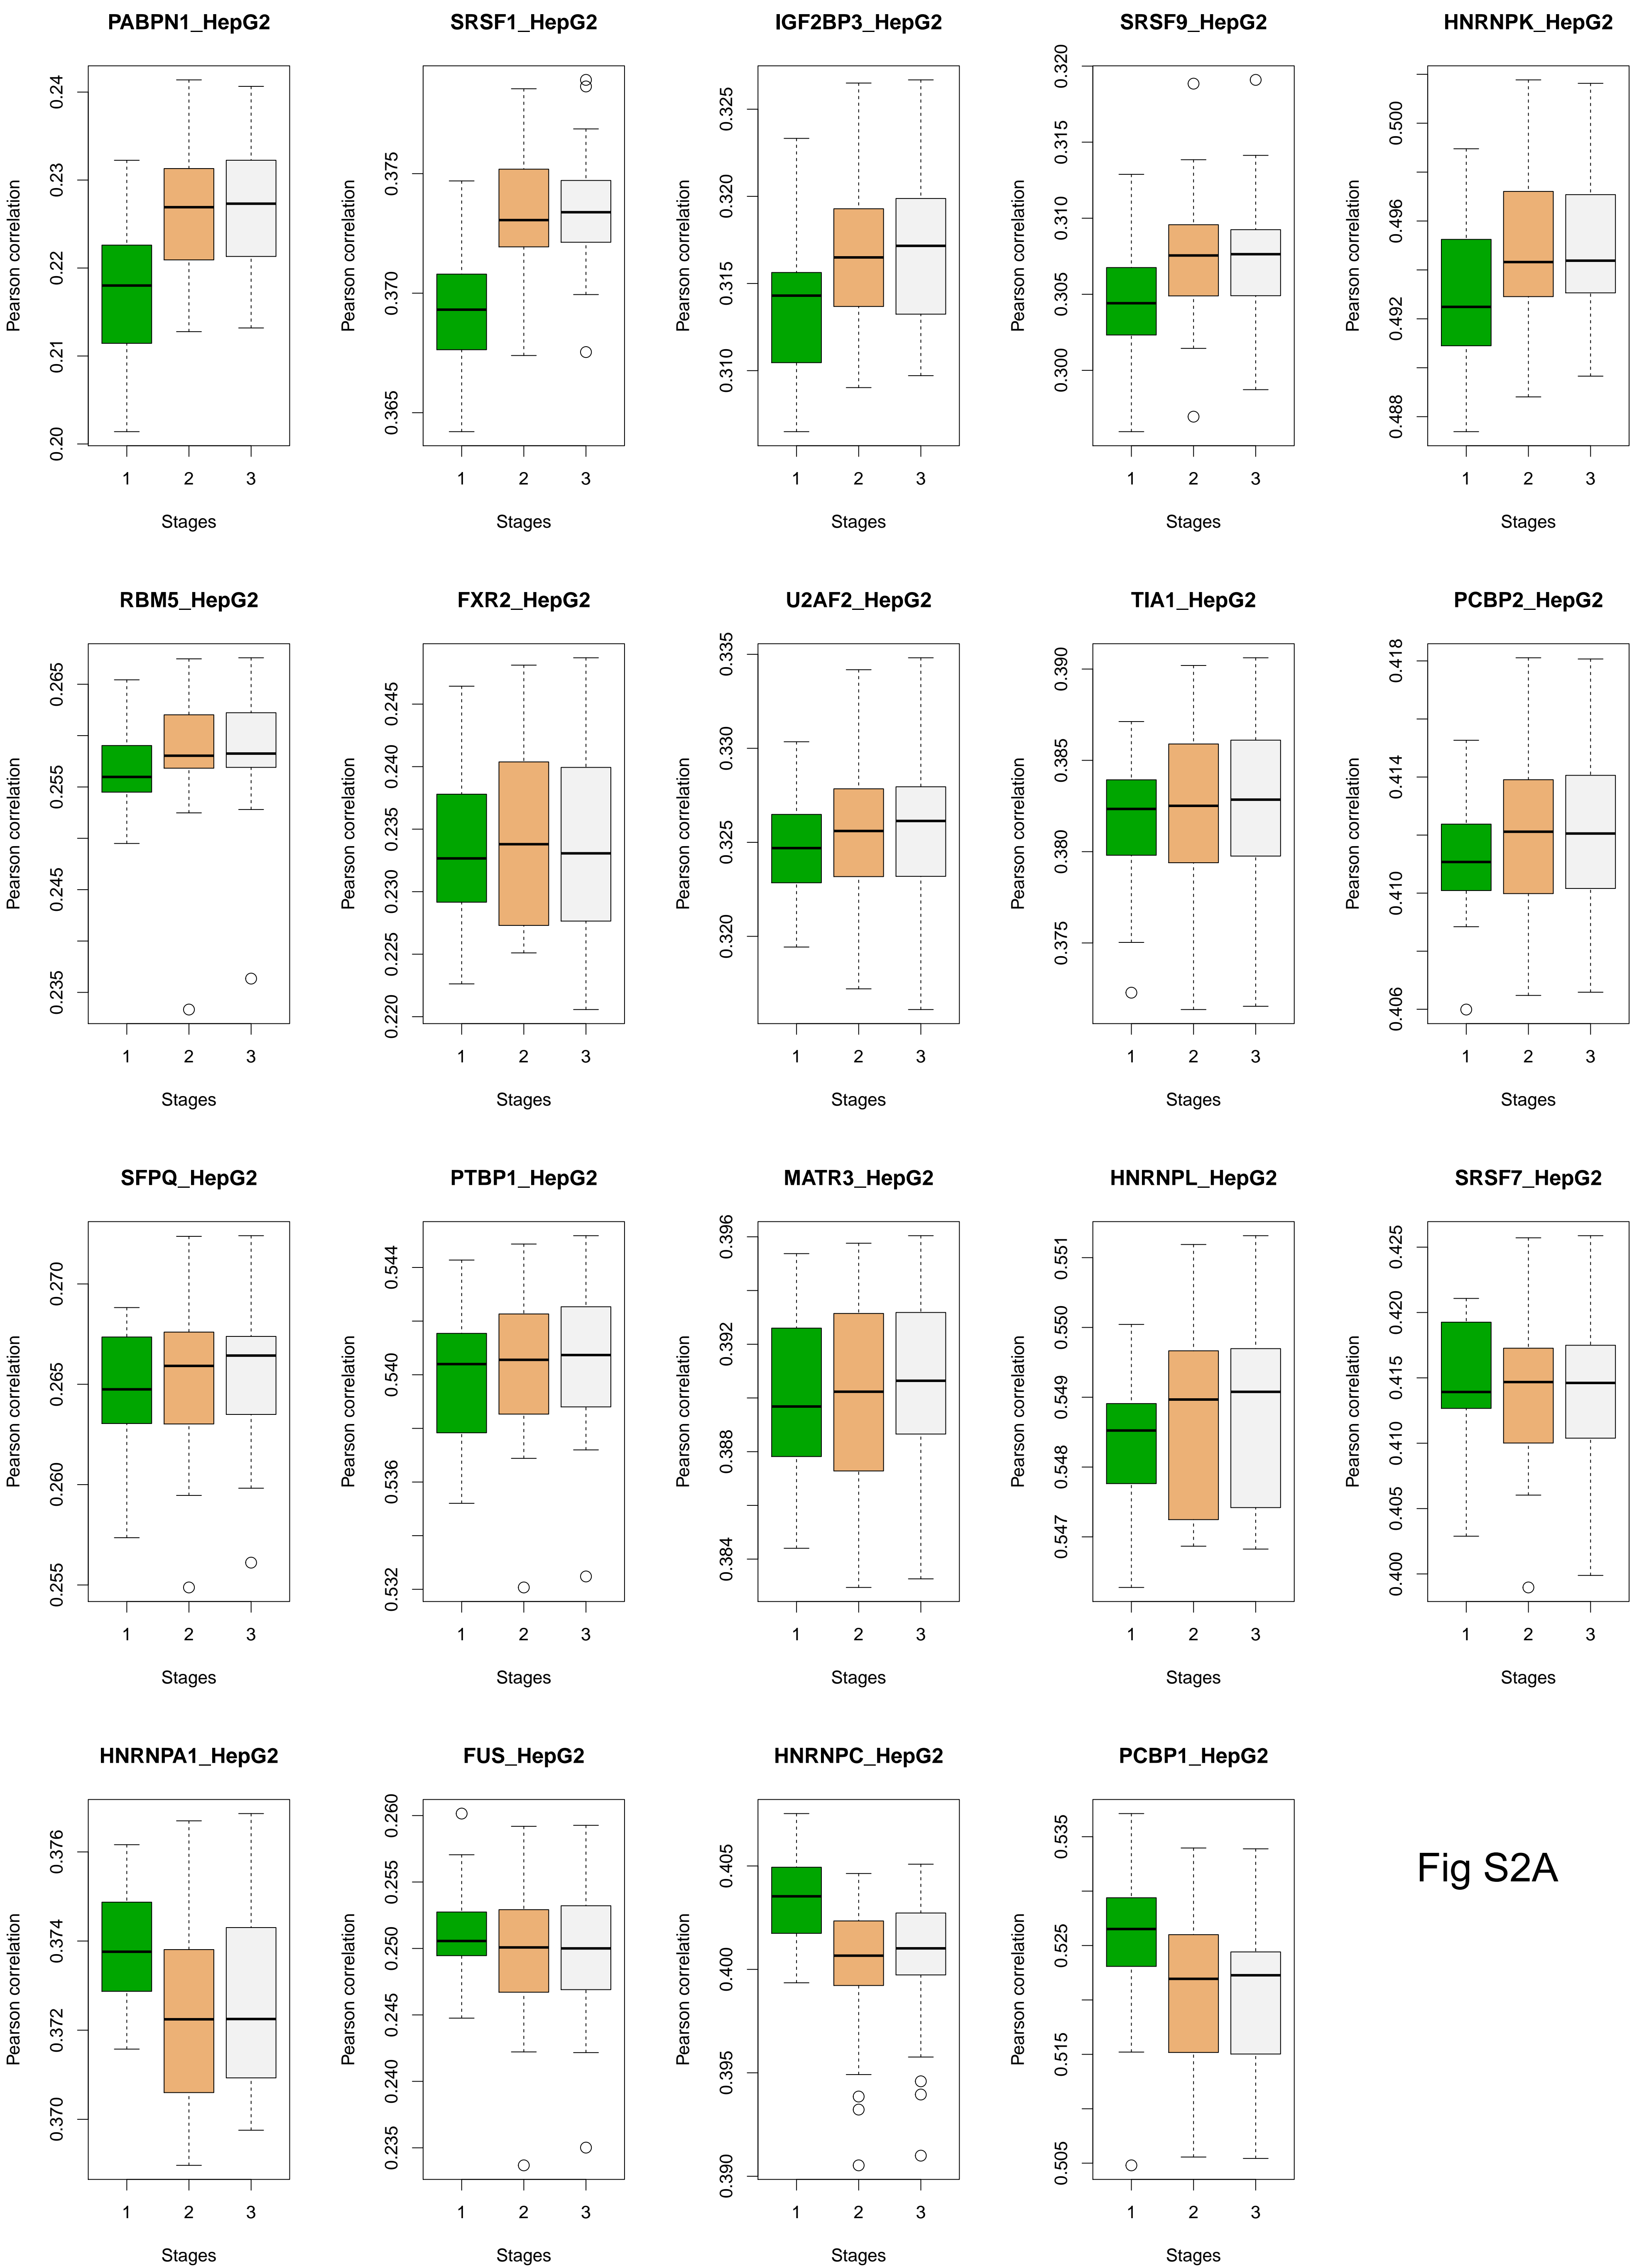

Fig S2A

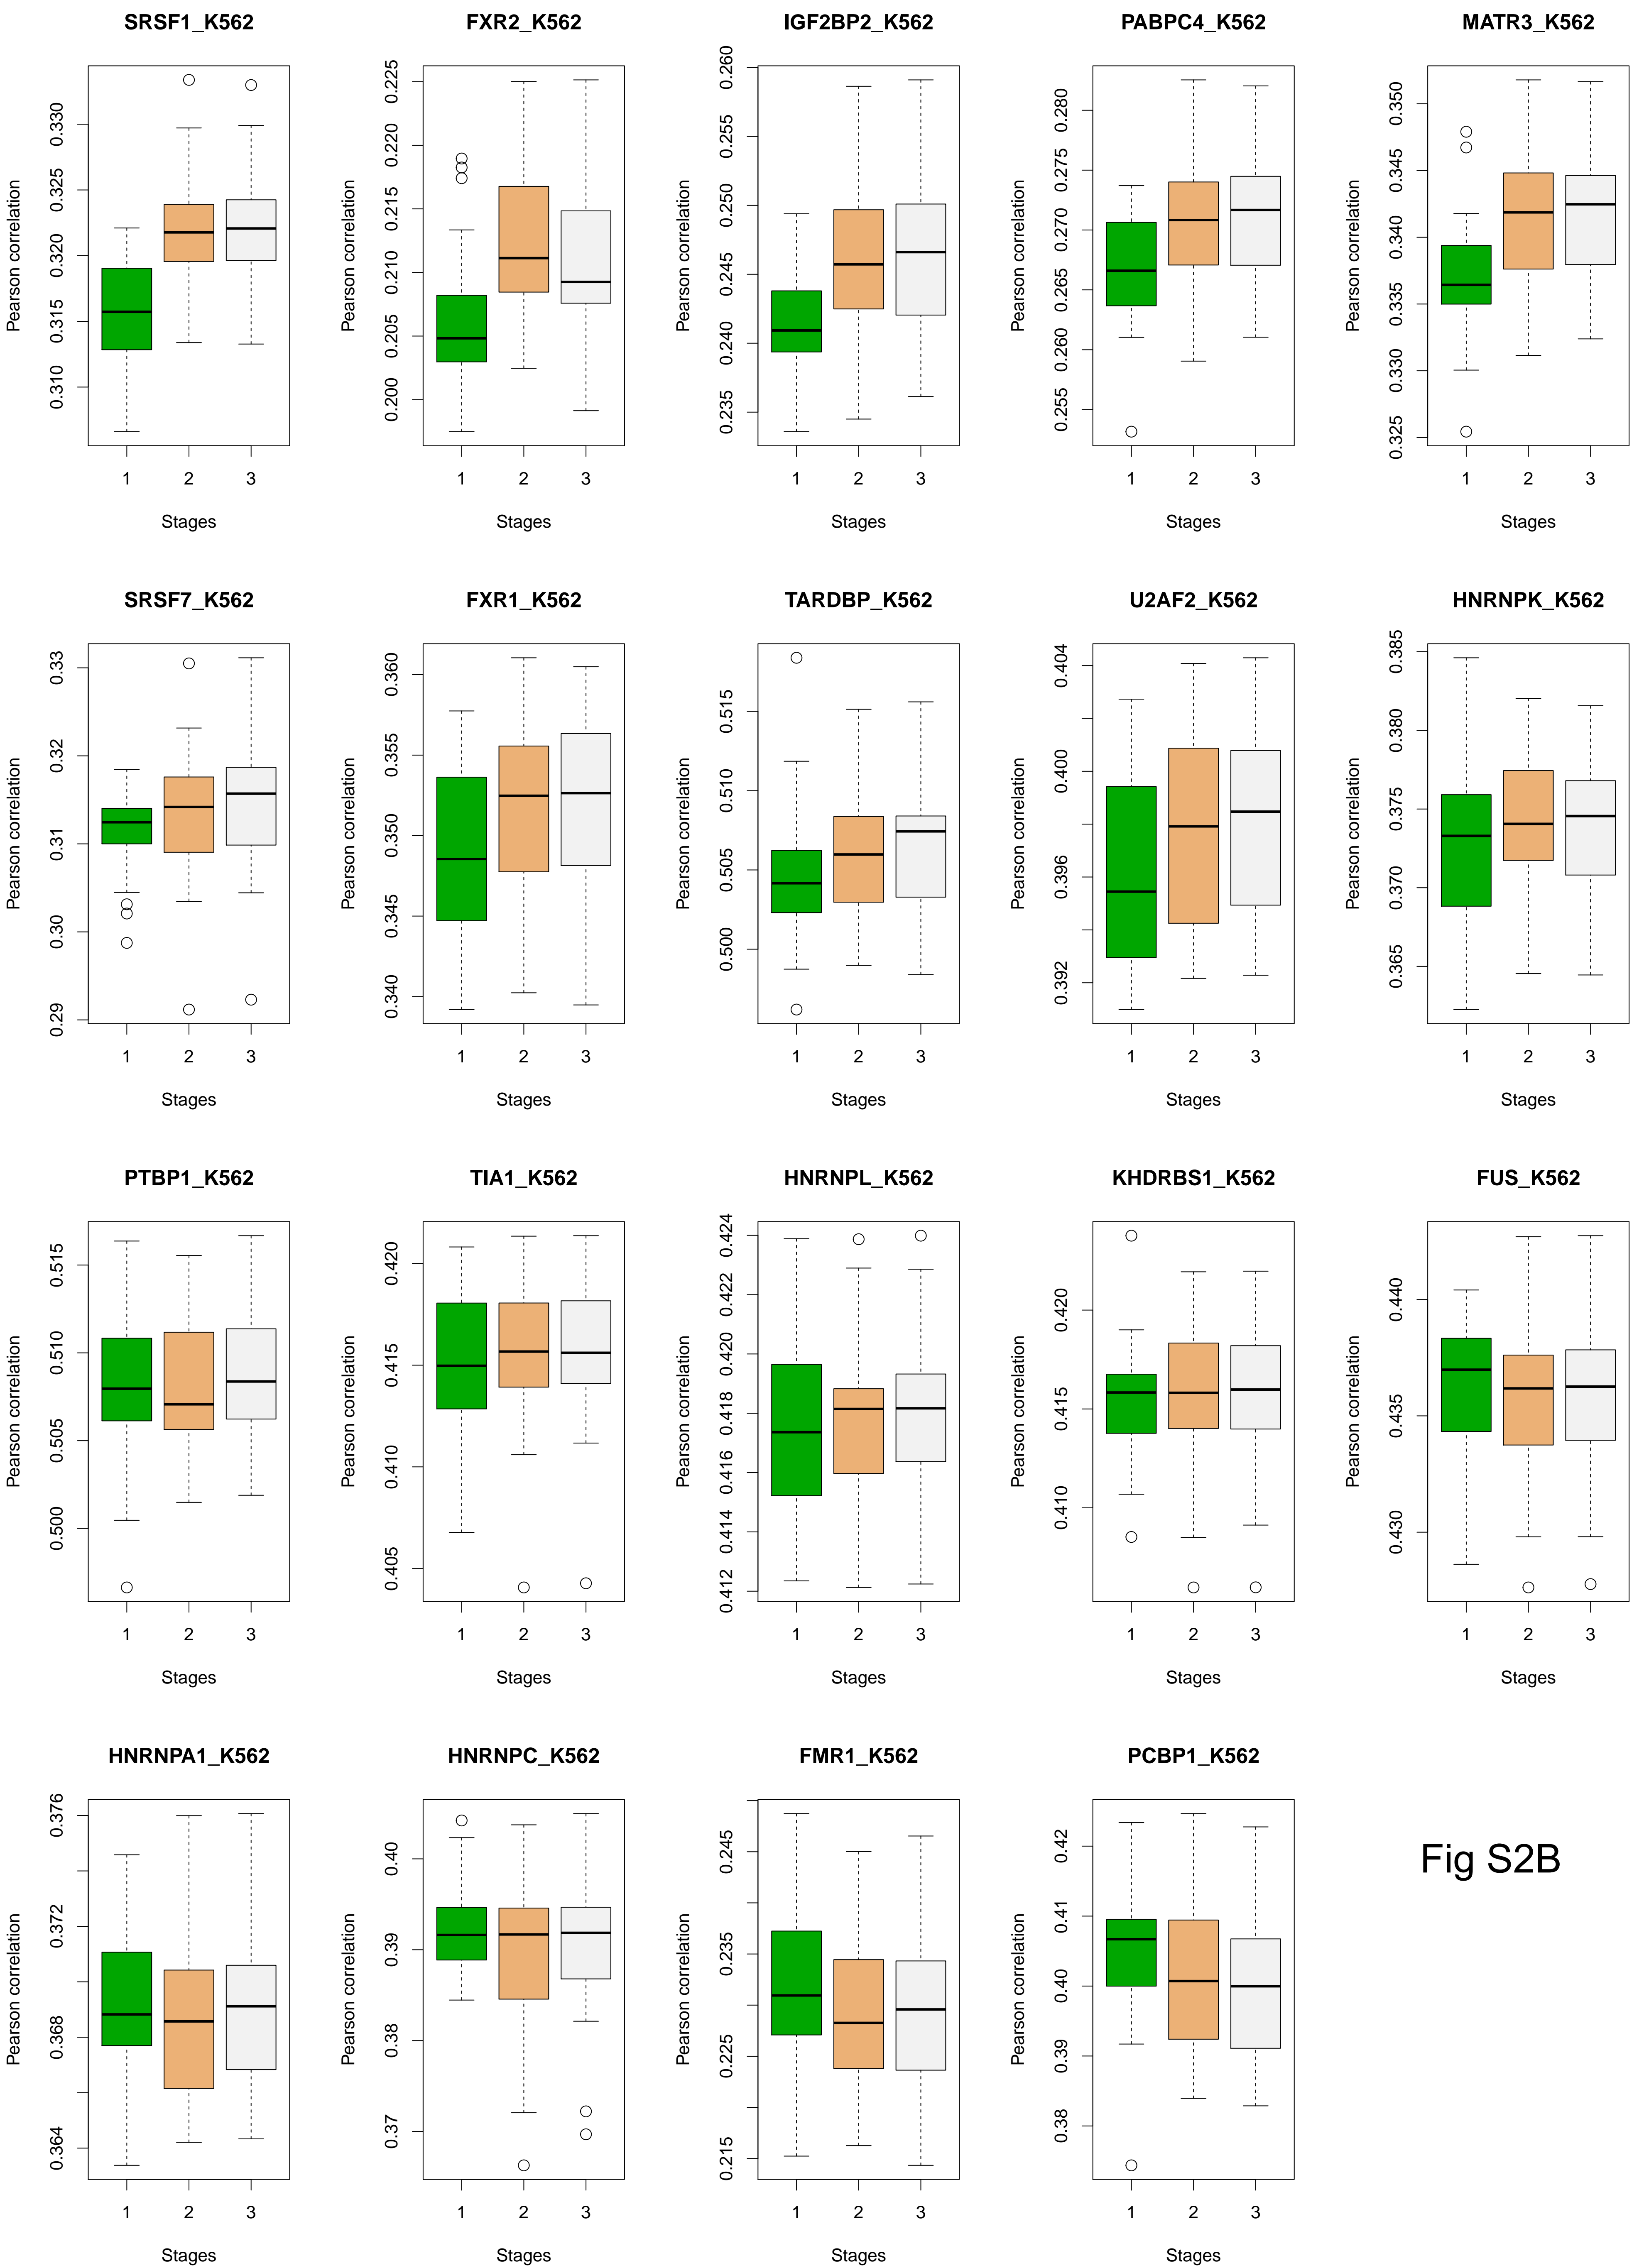

Fig S2B

Fig S2C **IGF2BP3**

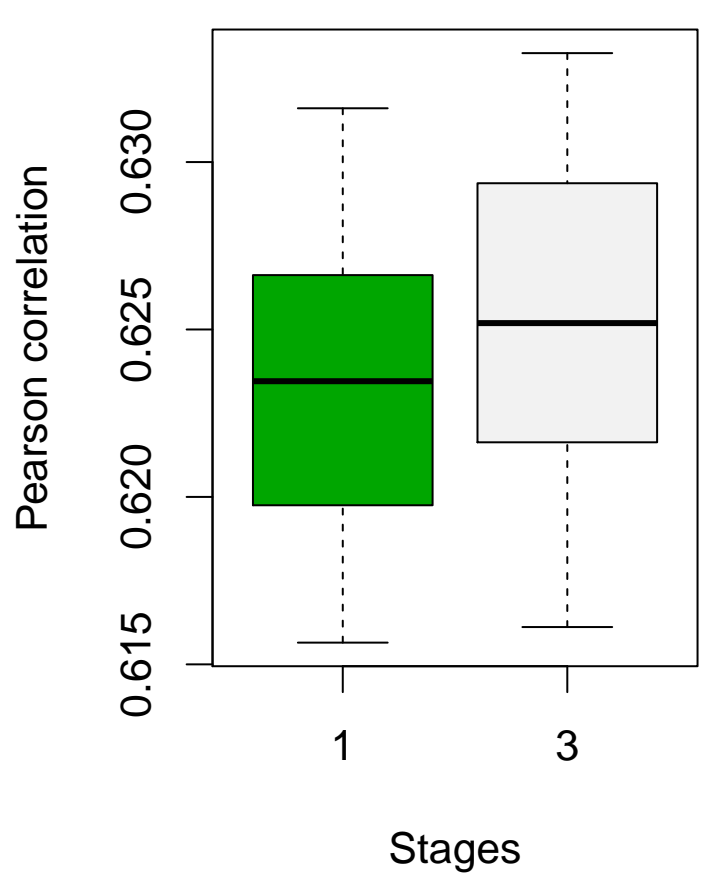

**IGF2BP2**

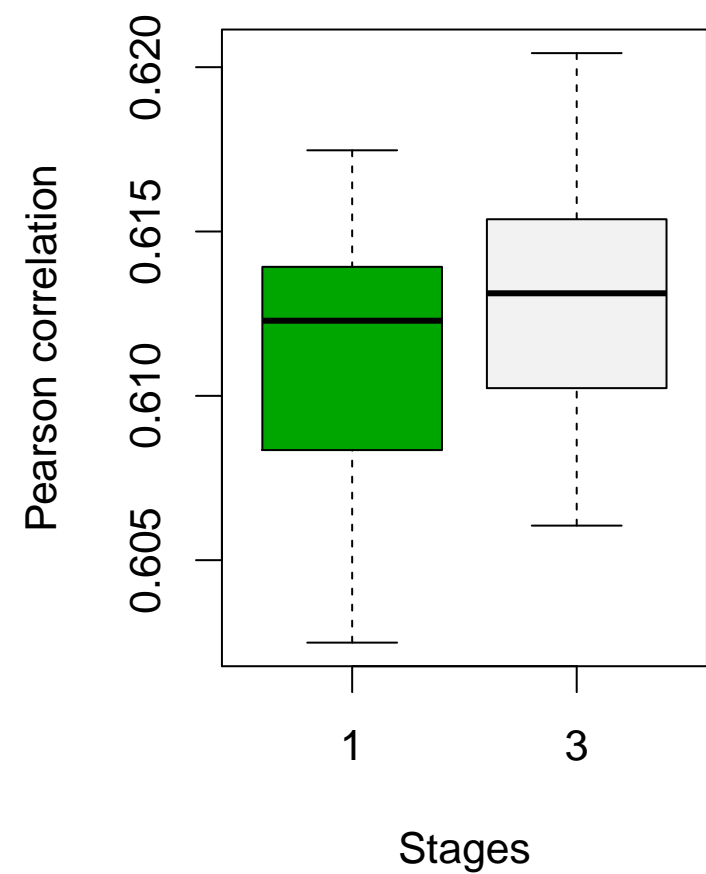

**PABPN1**

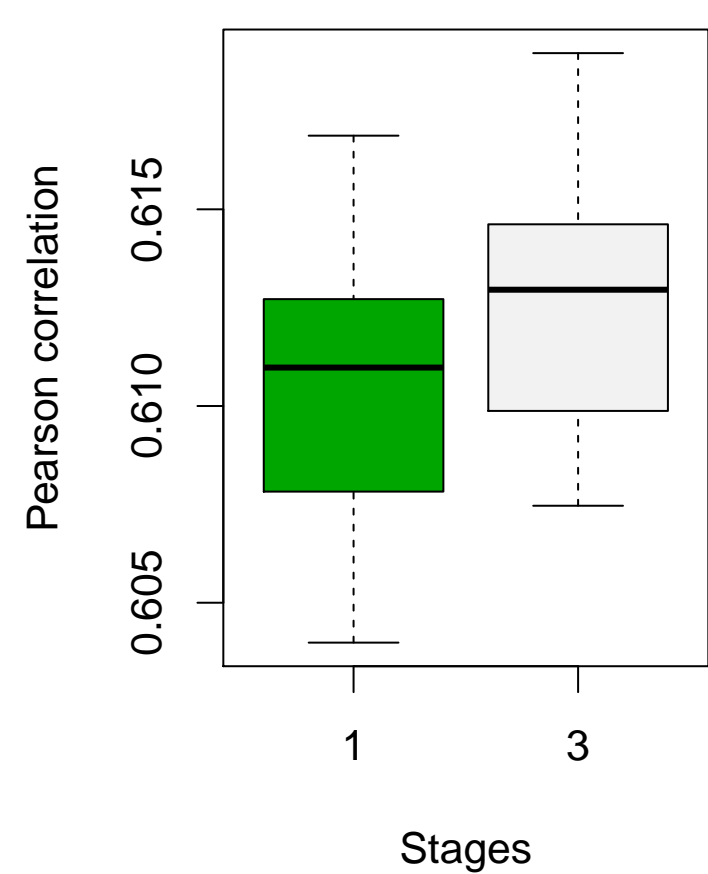

**HNRNPL**

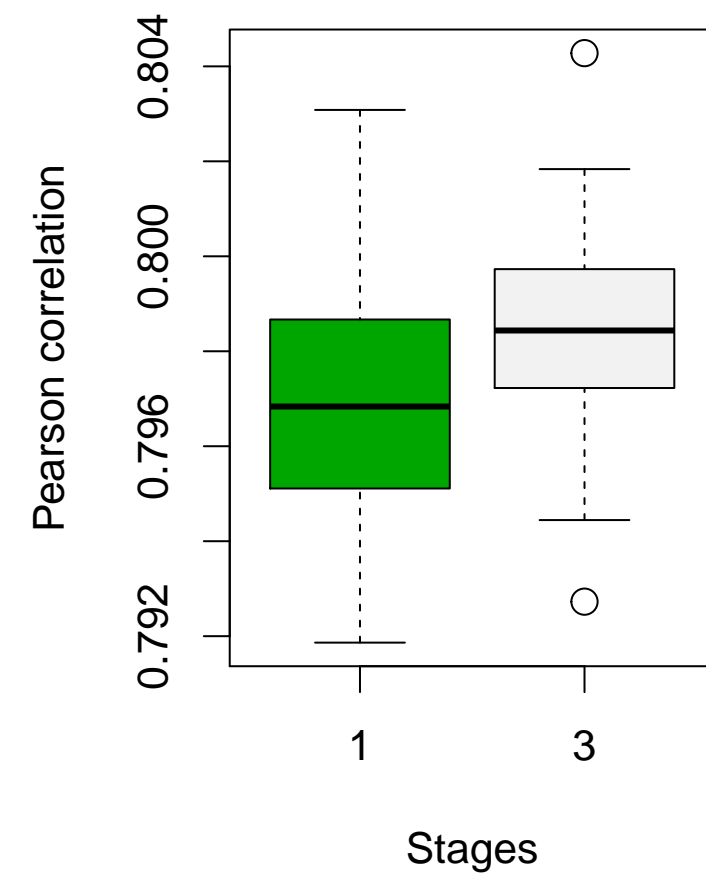

**FXR1**

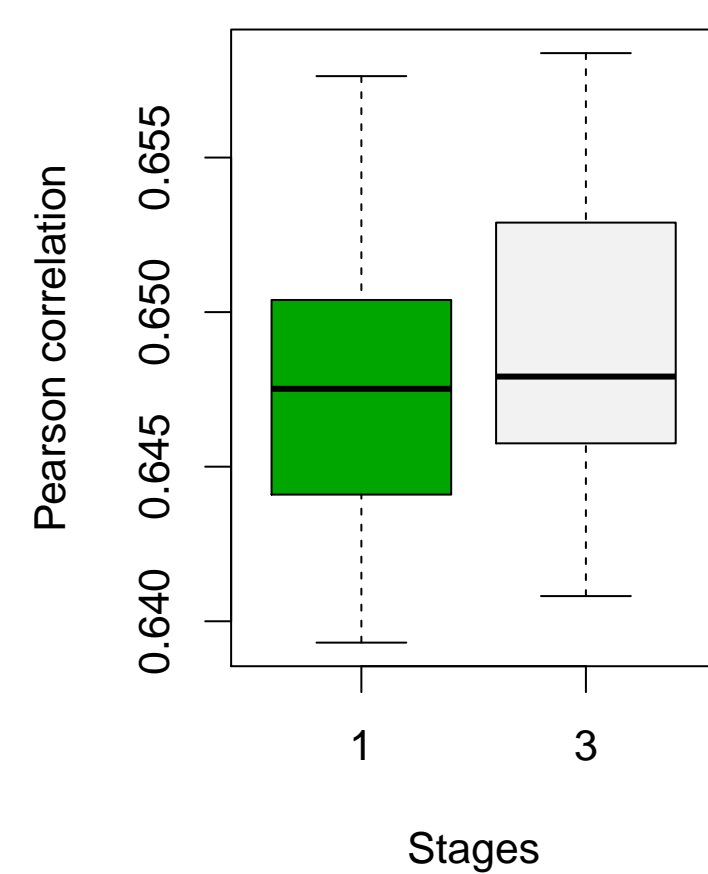

**SFPQ**

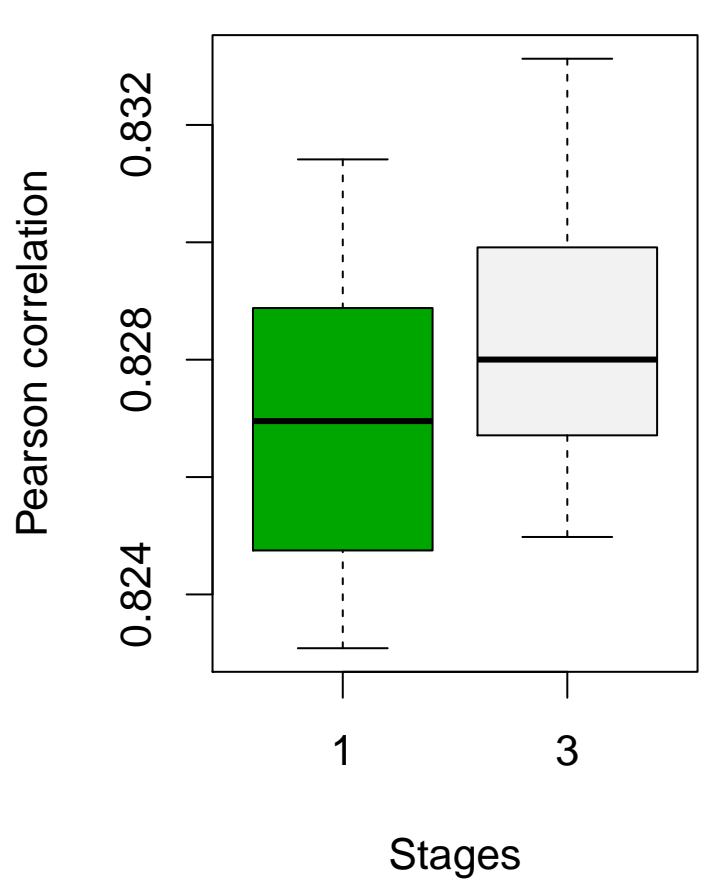

**TIA1**

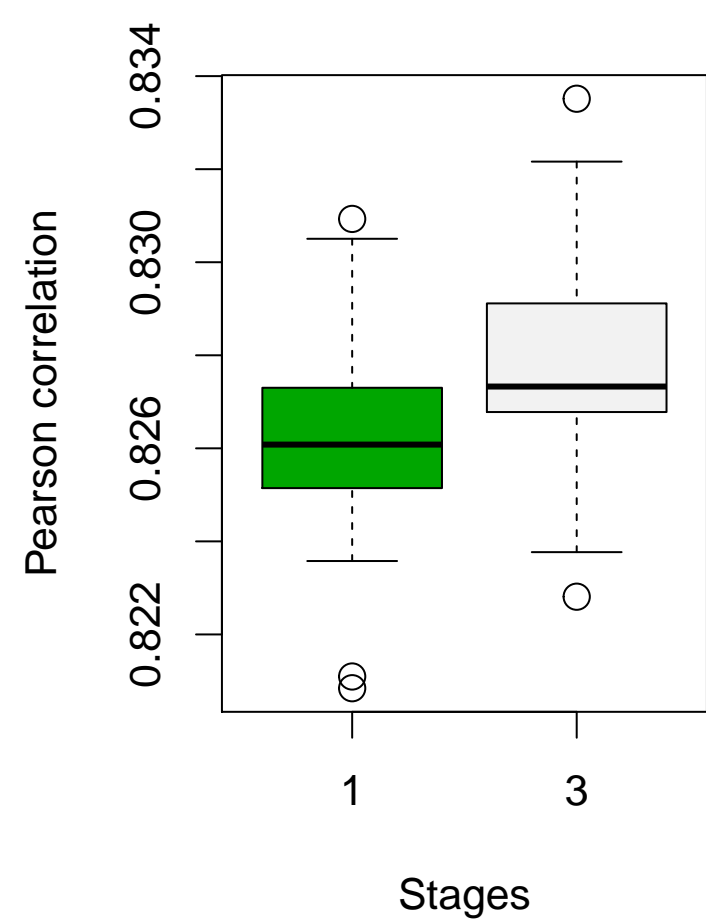

**SRSF9**

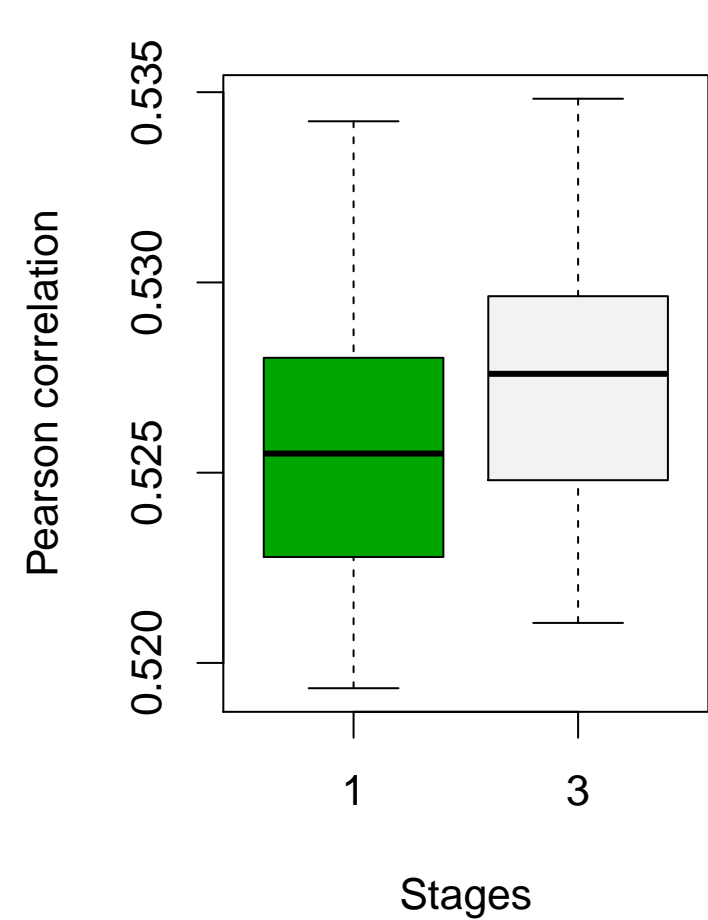

**FMR1**

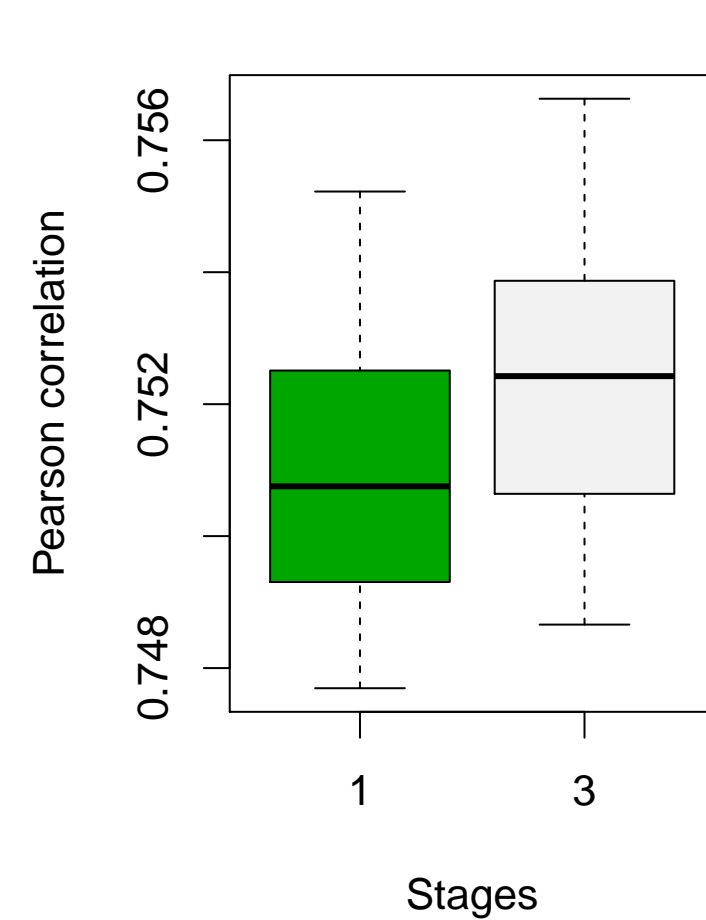

**TARDBP**

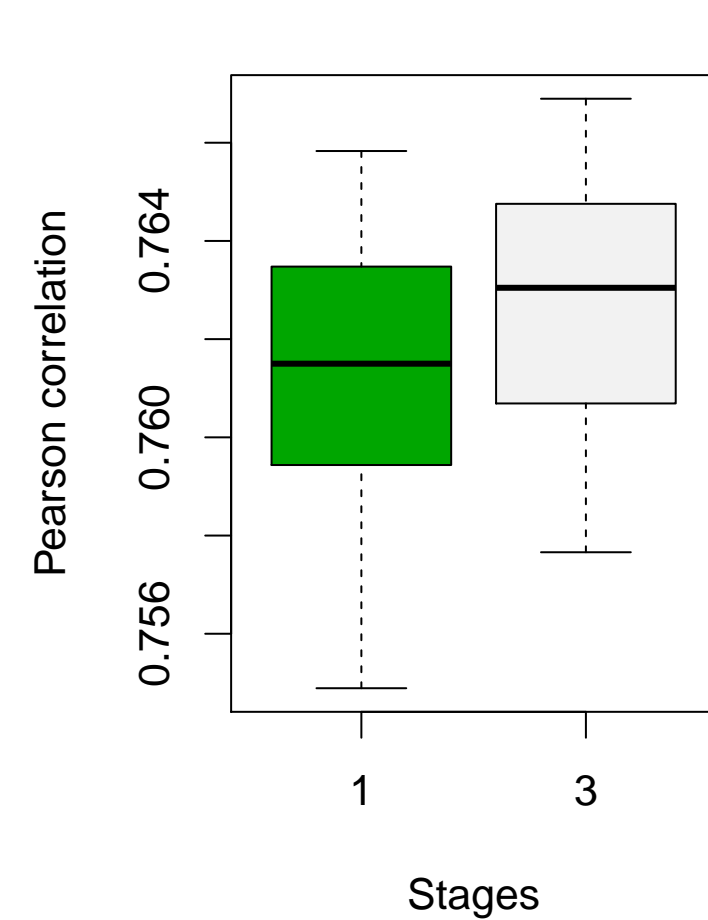

**MATR3**

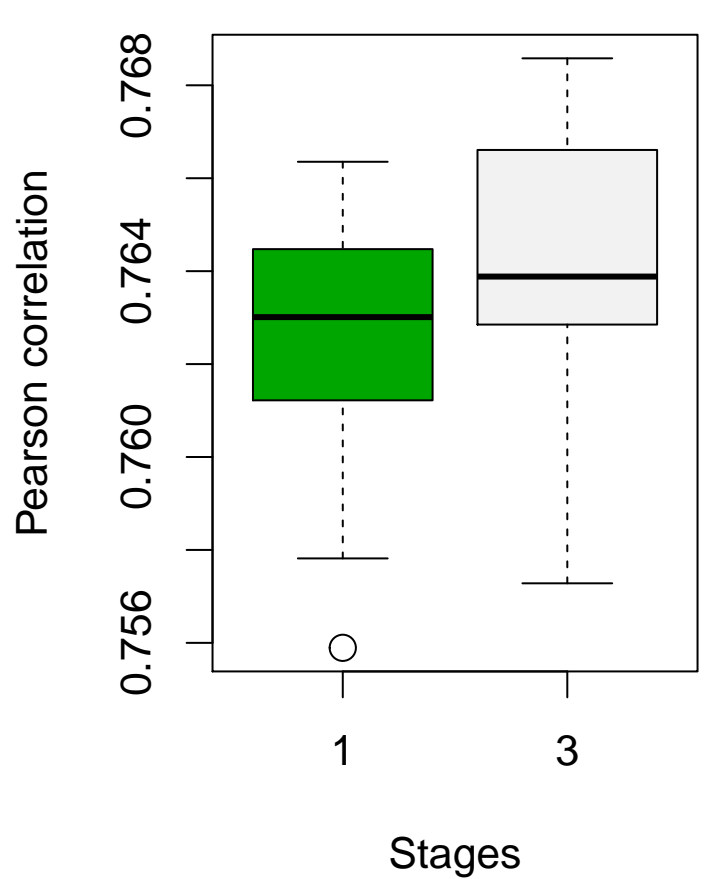

**HNRNPC**

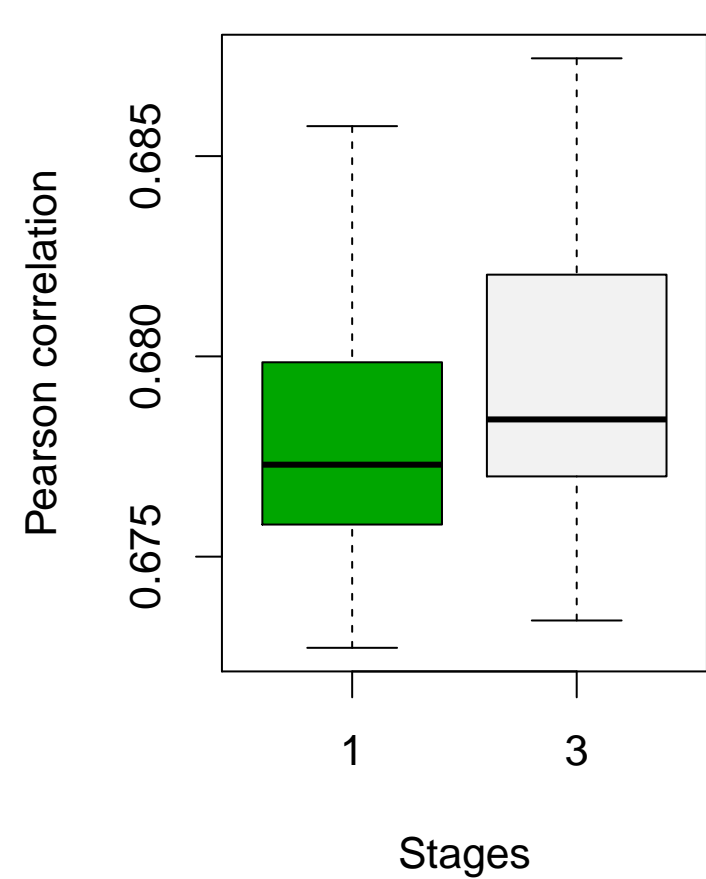

**U2AF2**

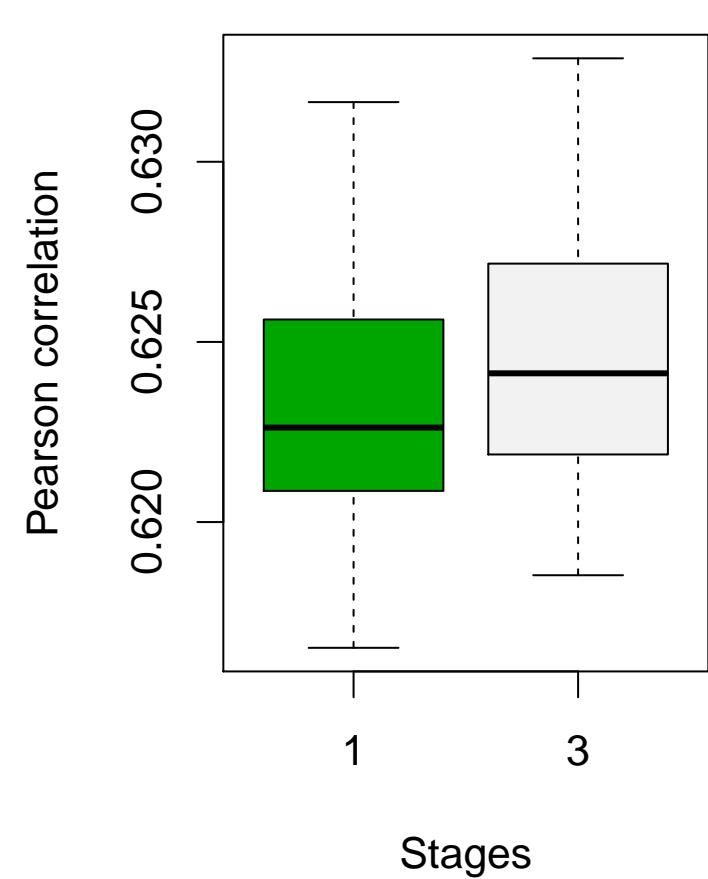

**HNRNPK**

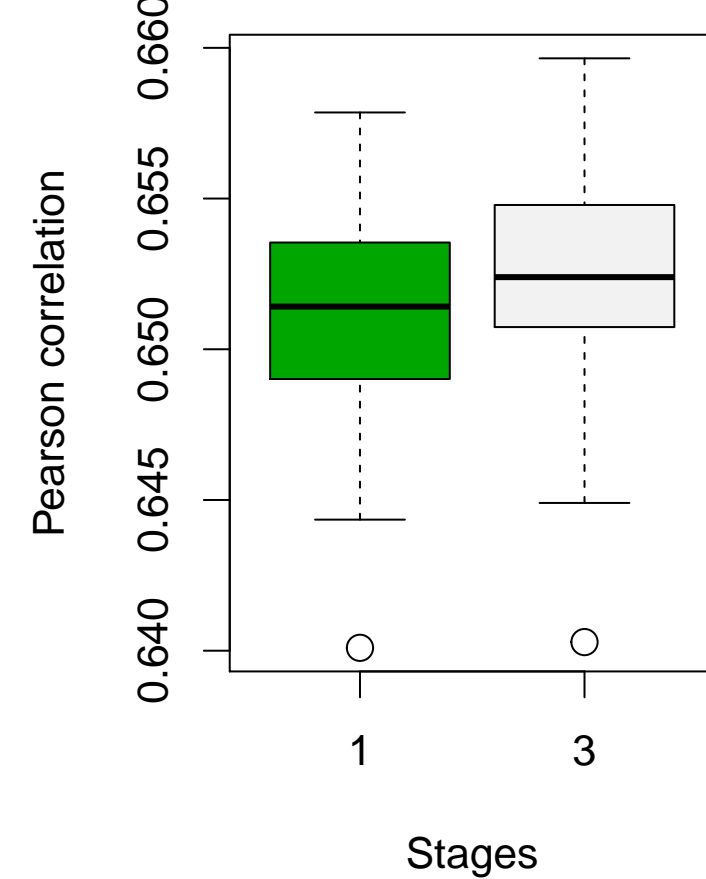

**SRSF7**

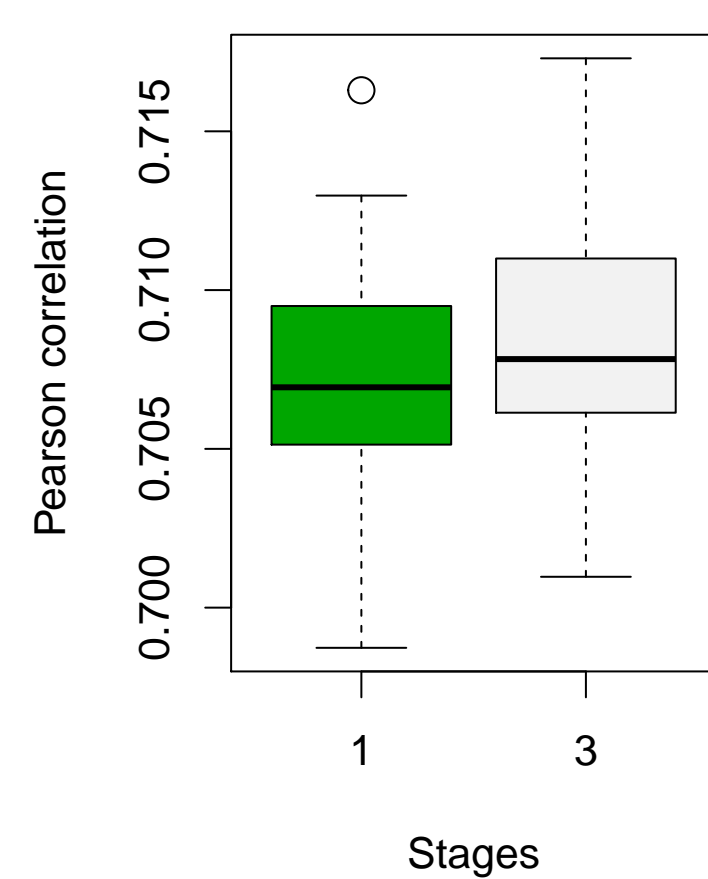

**FUS**

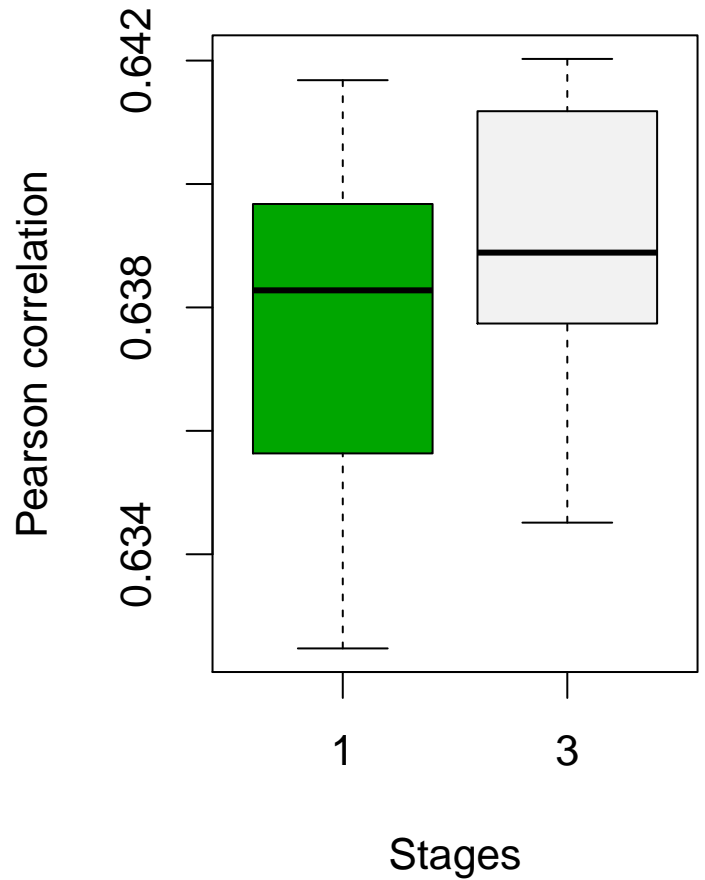

**PTBP1**

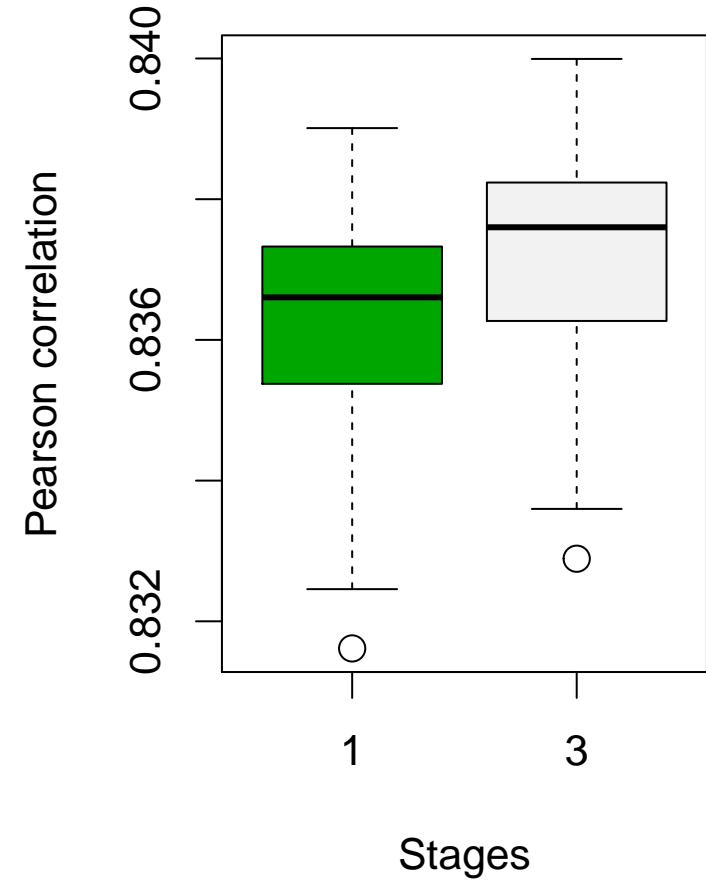

**PABPC4**

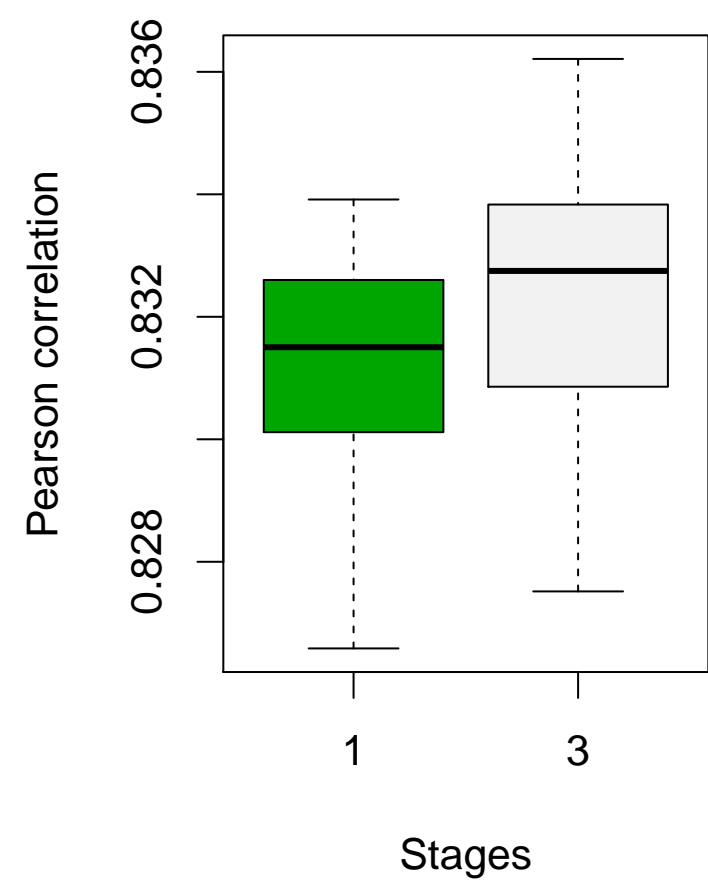

**FXR2**

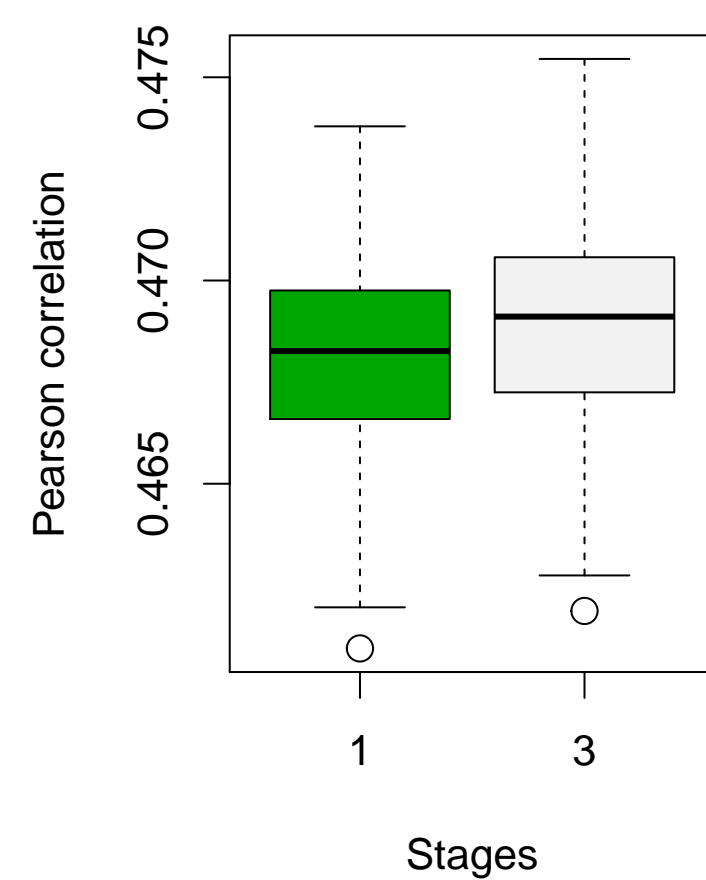

**KHDRBS1**

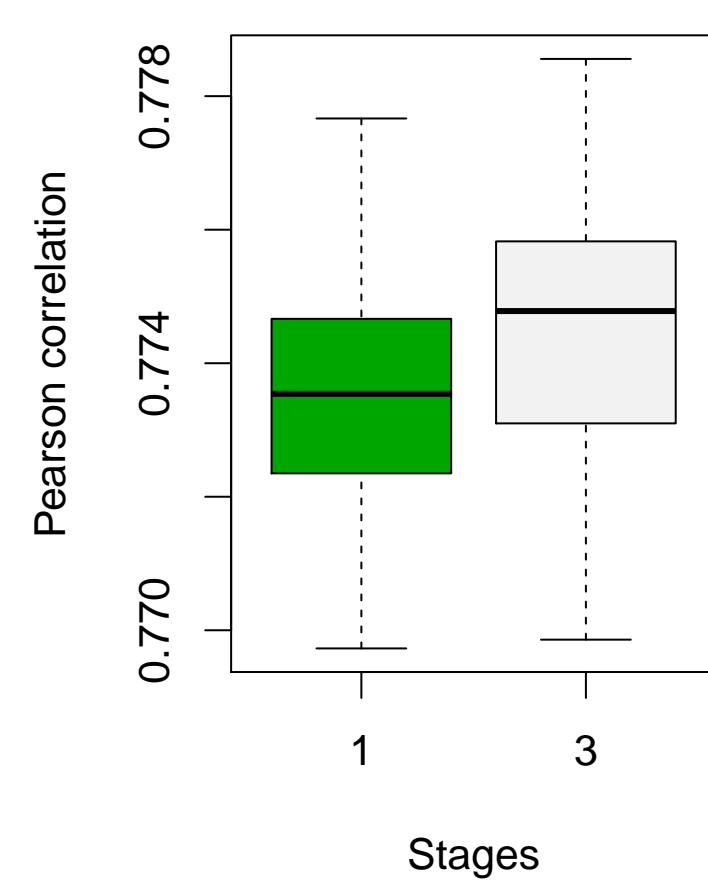

**RBM5**

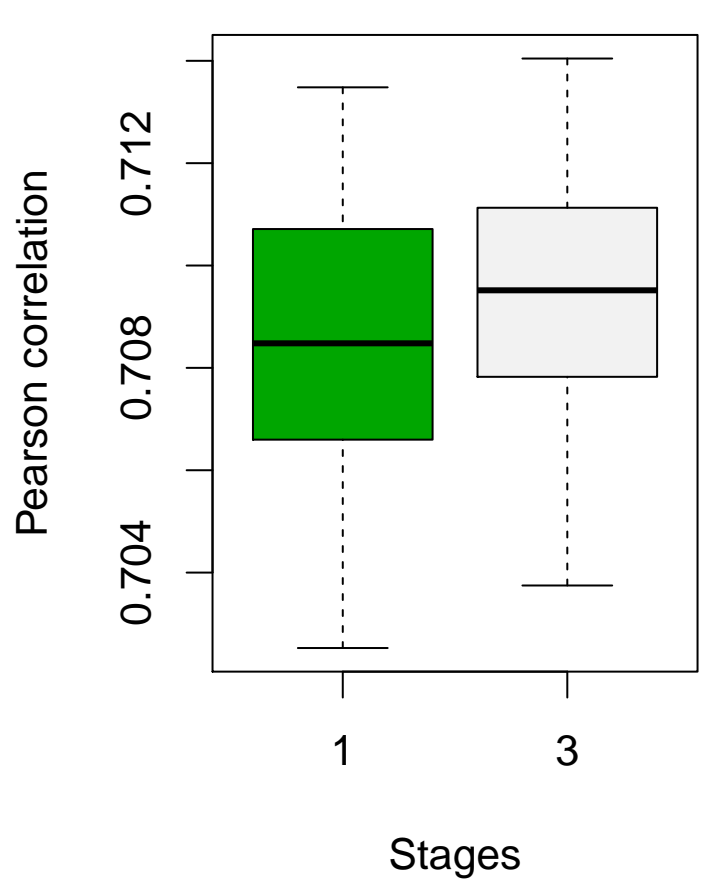

**PCBP1**

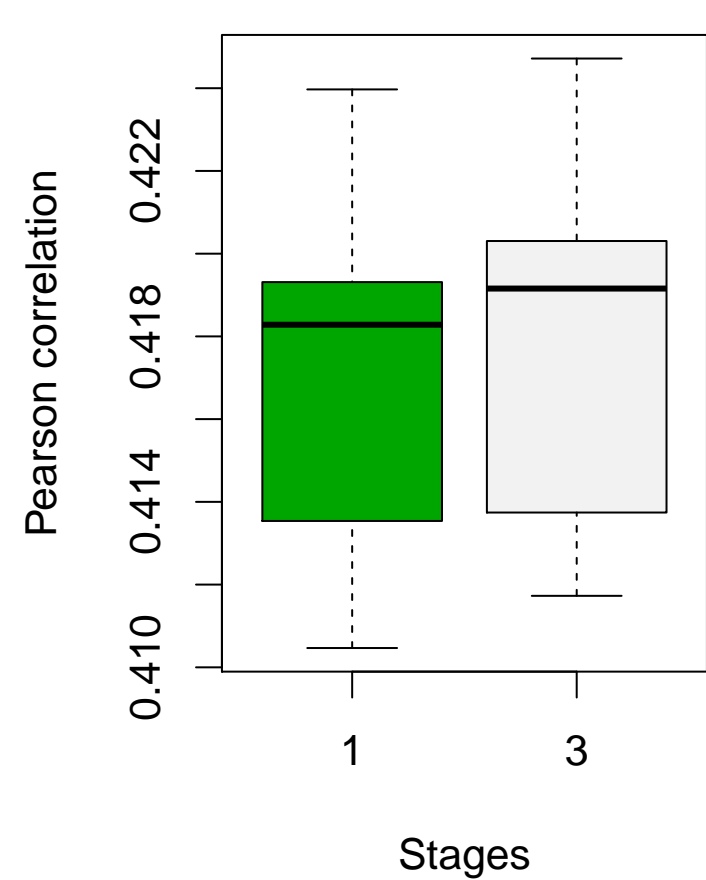

**HNRNPA1**

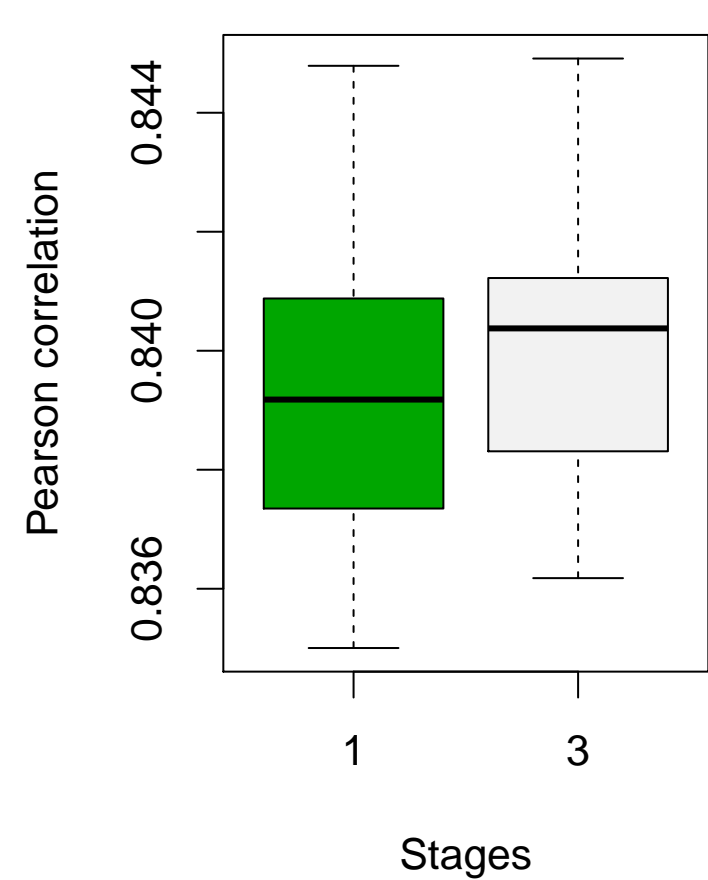

**SRSF1**

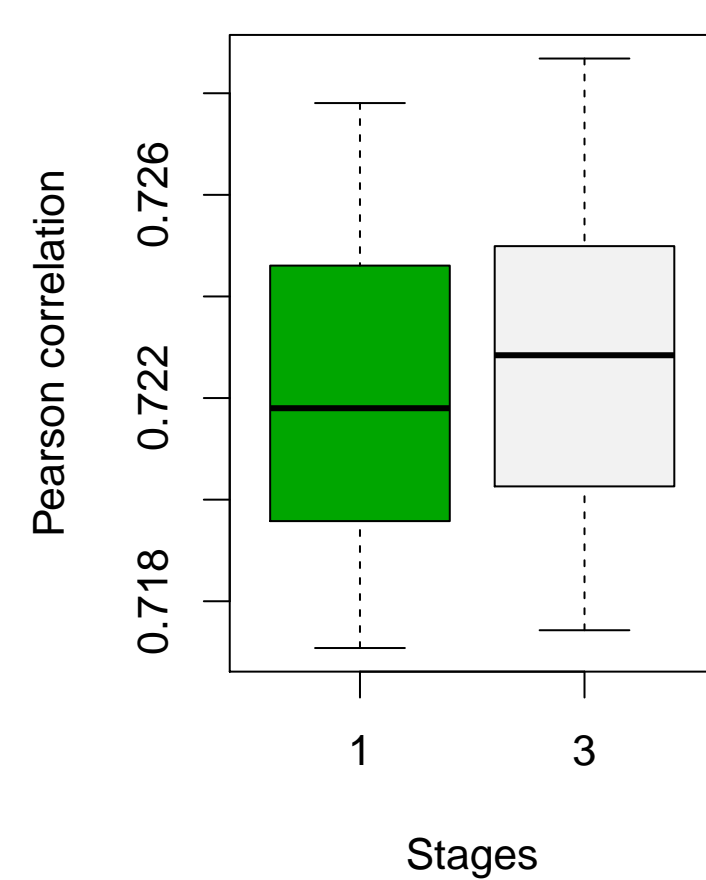

**PCBP2**

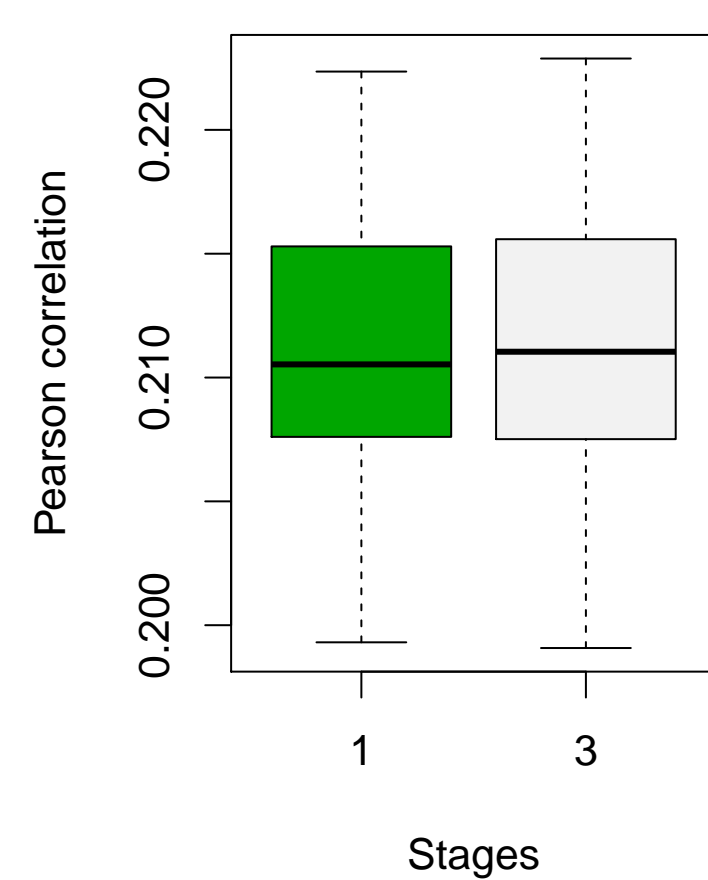

Supplement: pcbi.1009863.s007.pdf [file pcbi.1009863.s007.pdf]
