# Supplementary material for: Inferring RNA-binding protein target preferences using adversarial domain adaptation
Source: PubMed Central journal article supplement (PMC8870515; doi:10.1371/journal.pcbi.1009863), 2022-02-24

# Contents

|              |    |               |    |
|--------------|----|---------------|----|
| FMR1_K562    | 2  | FUS_HepG2     | 21 |
| FUS_K562     | 3  | FXR2_HepG2    | 22 |
| FXR1_K562    | 4  | HNRNPC_HepG2  | 23 |
| FXR2_K562    | 5  | HNRNPK_HepG2  | 24 |
| HNRNPA1_K562 | 6  | HNRNPL_HepG2  | 25 |
| HNRNPC_K562  | 7  | IGF2BP3_HepG2 | 26 |
| HNRNPK_K562  | 8  | MATR3_HepG2   | 27 |
| HNRNPL_K562  | 9  | PABPN1_HepG2  | 28 |
| IGF2BP2_K562 | 10 | PCBP1_HepG2   | 29 |
| KHDRBS1_K562 | 11 | PCBP2_HepG2   | 30 |
| MATR3_K562   | 12 | PTBP1_HepG2   | 31 |
| PABPC4_K562  | 13 | RBM5_HepG2    | 32 |
| PCBP1_K562   | 14 | SFPQ_HepG2    | 33 |
| PTBP1_K562   | 15 | SRSF1_HepG2   | 34 |
| SRSF1_K562   | 16 | SRSF7_HepG2   | 35 |
| SRSF7_K562   | 17 | SRSF9_HepG2   | 36 |
| TARDBP_K562  | 18 | TIA1_HepG2    | 37 |
| TIA1_K562    | 19 | U2AF2_HepG2   | 38 |
| U2AF2_K562   | 20 |               |    |

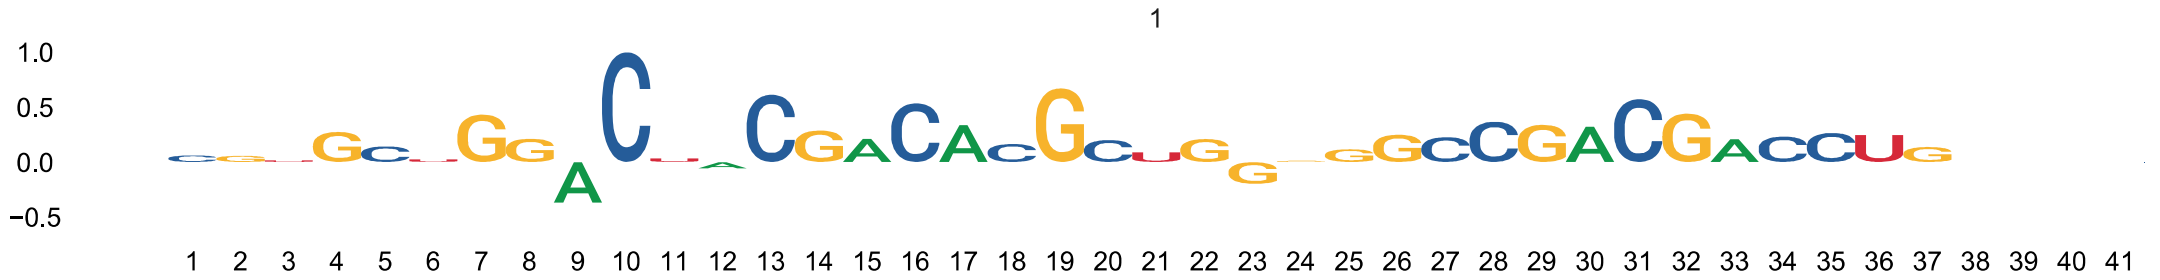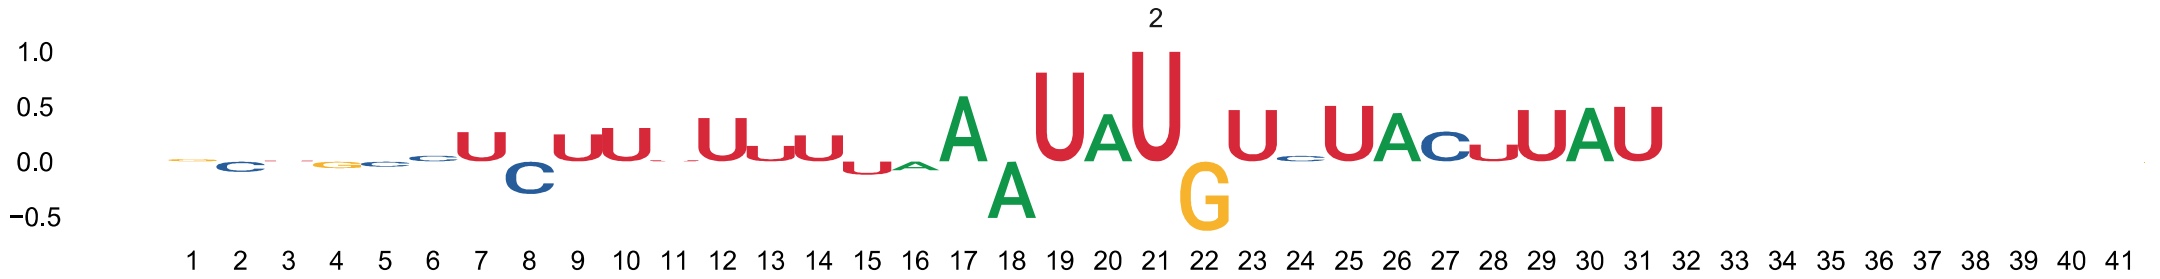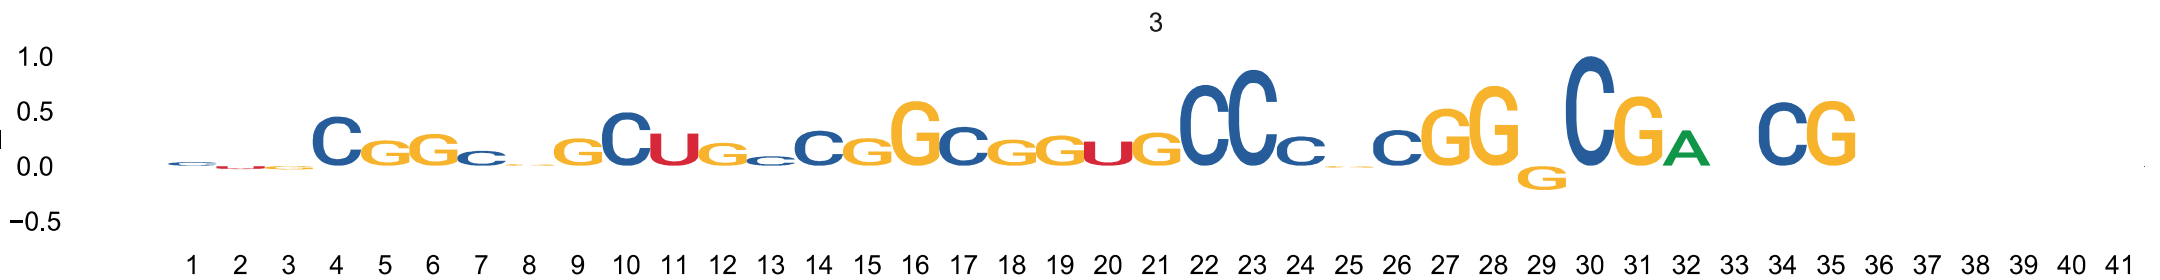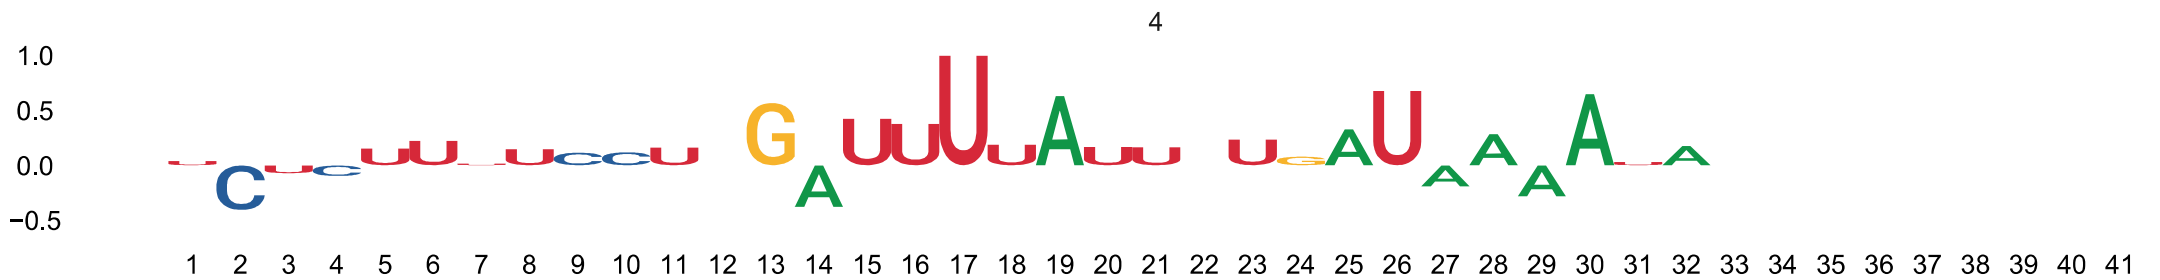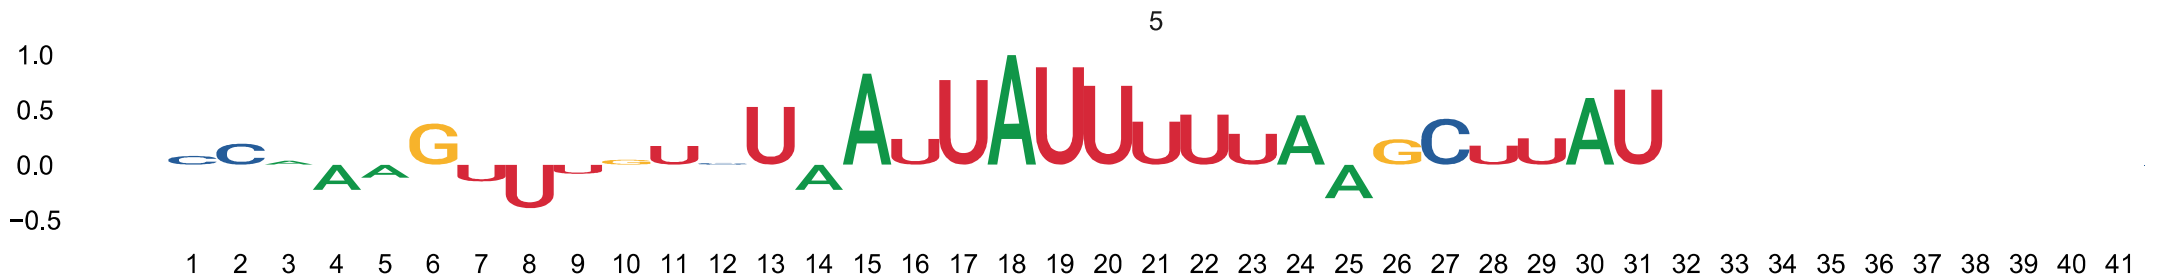

1

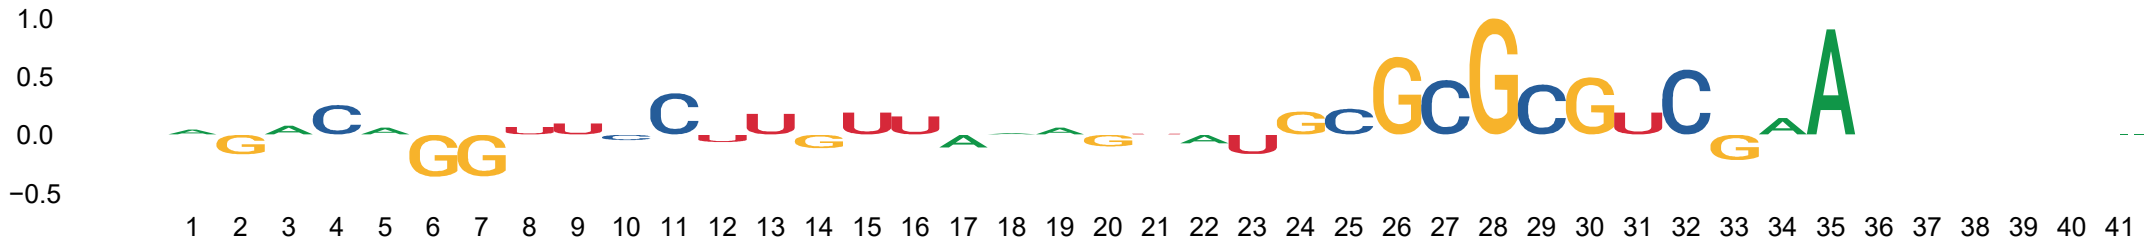

2

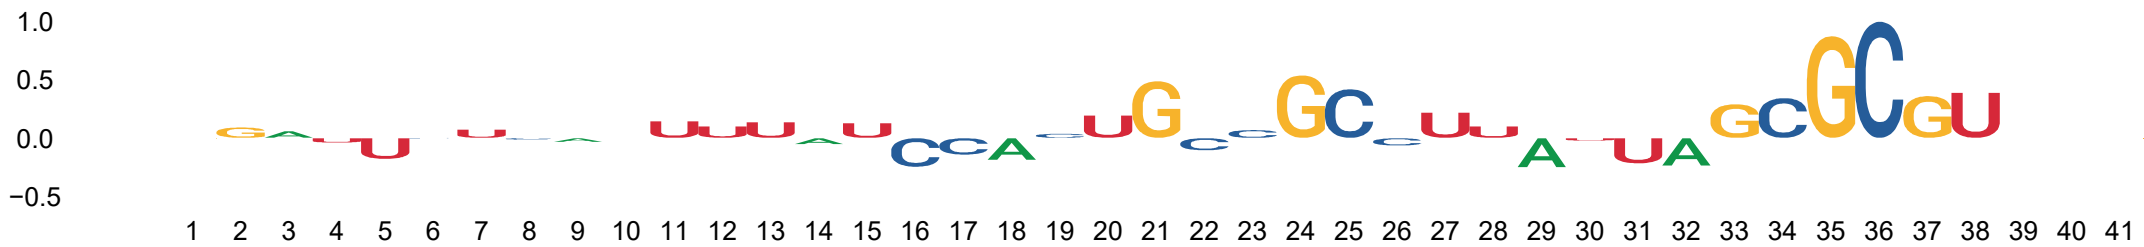

3

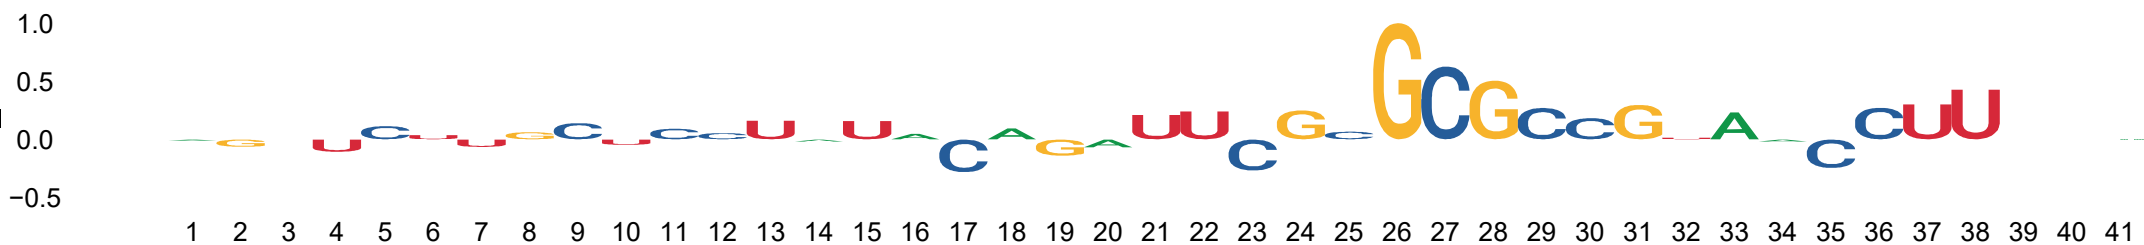

4

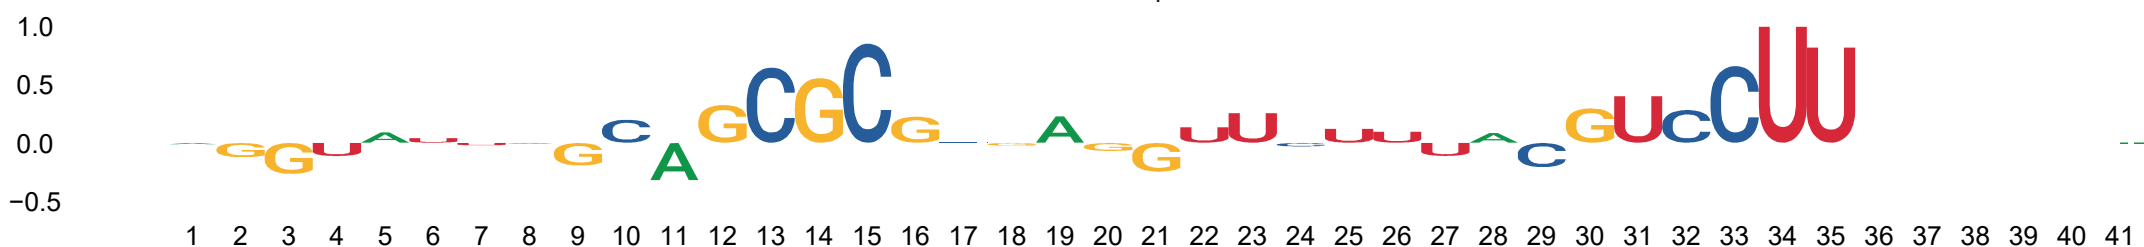

5

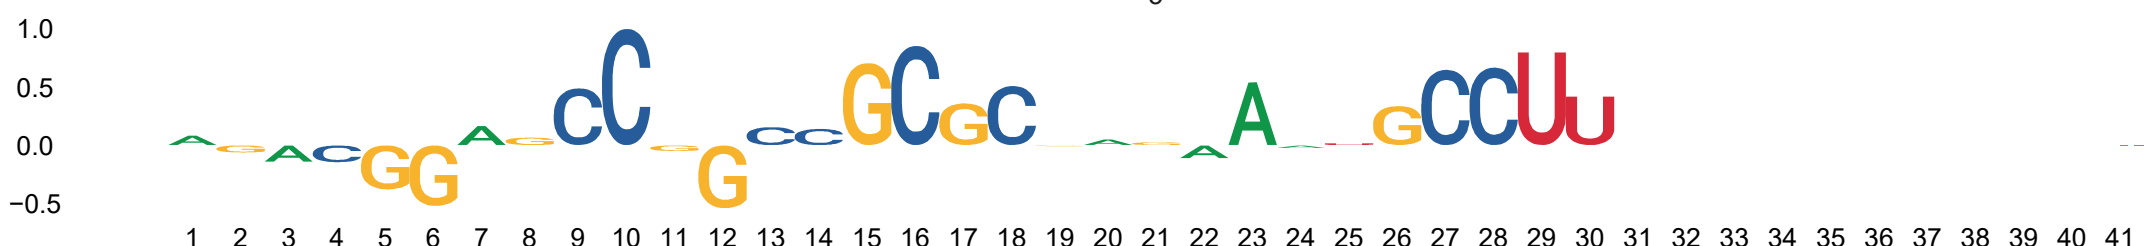

FUS\_K562

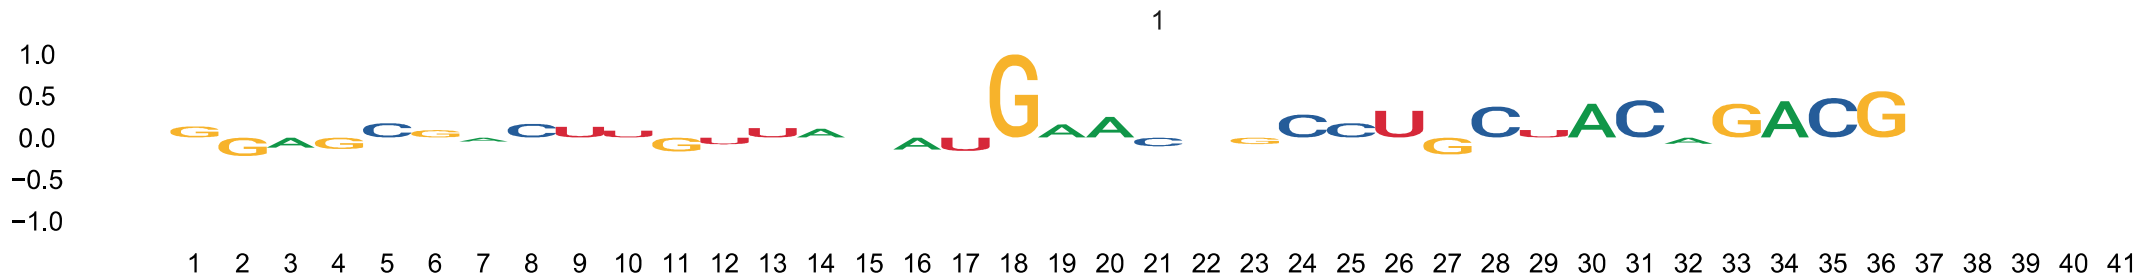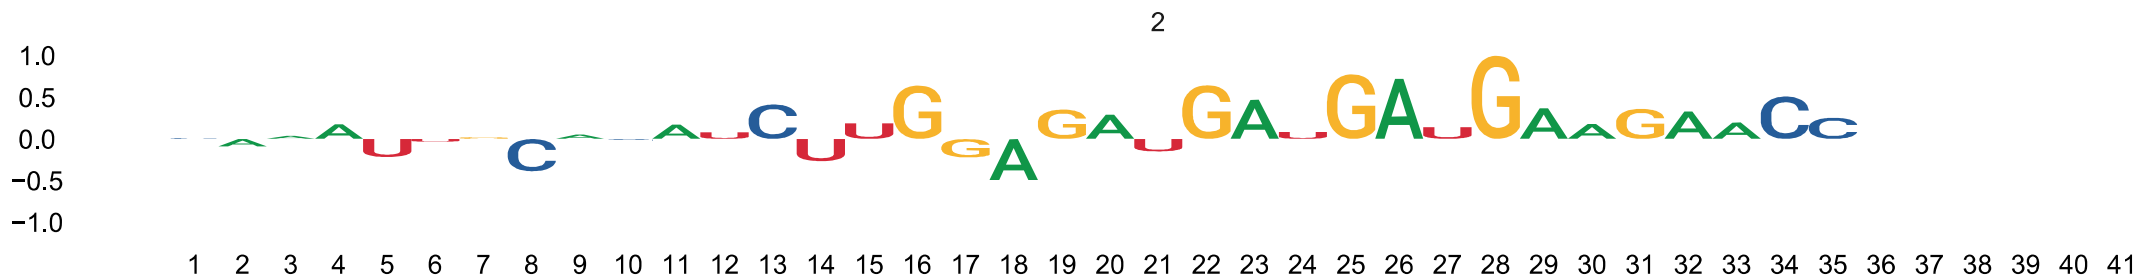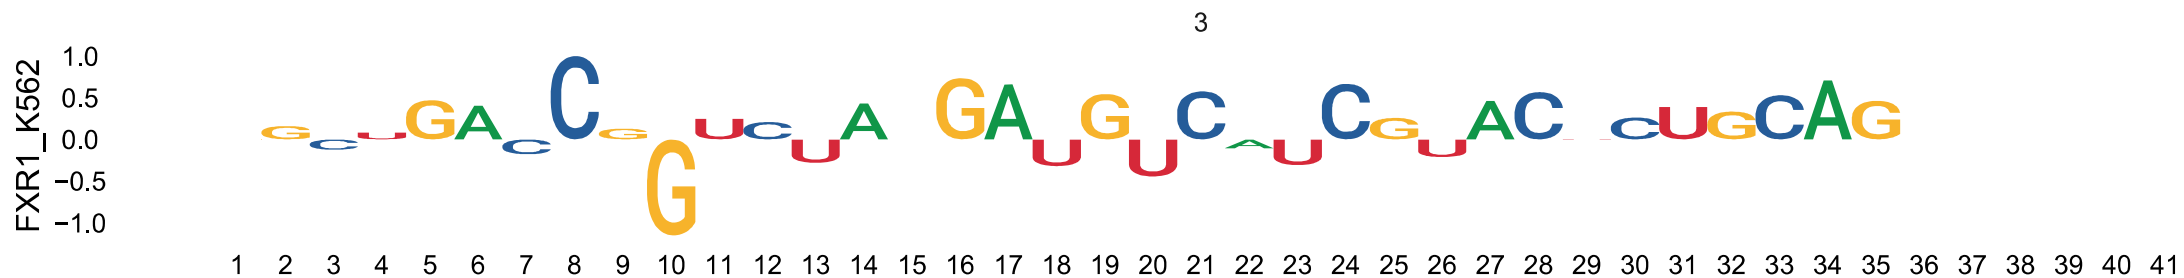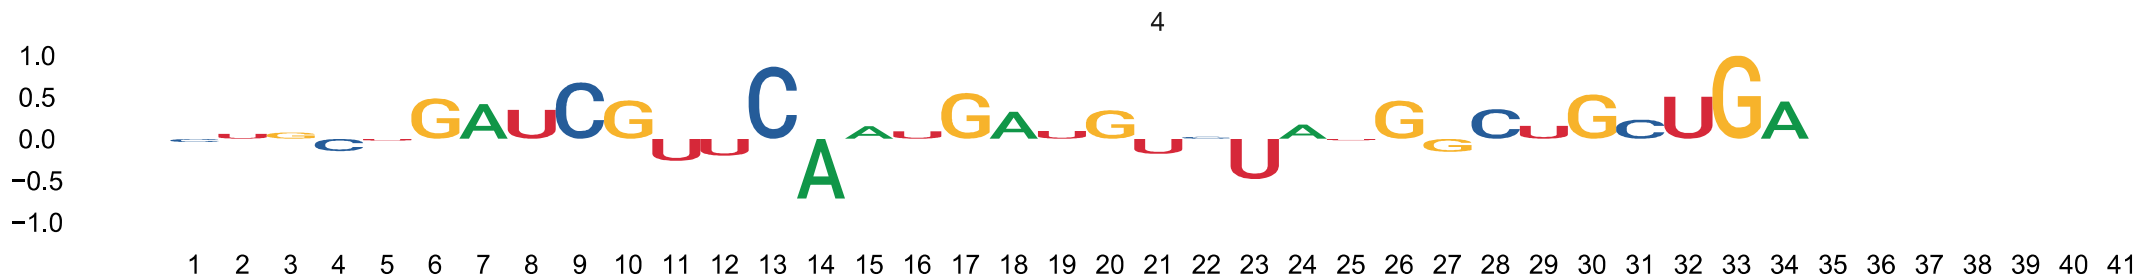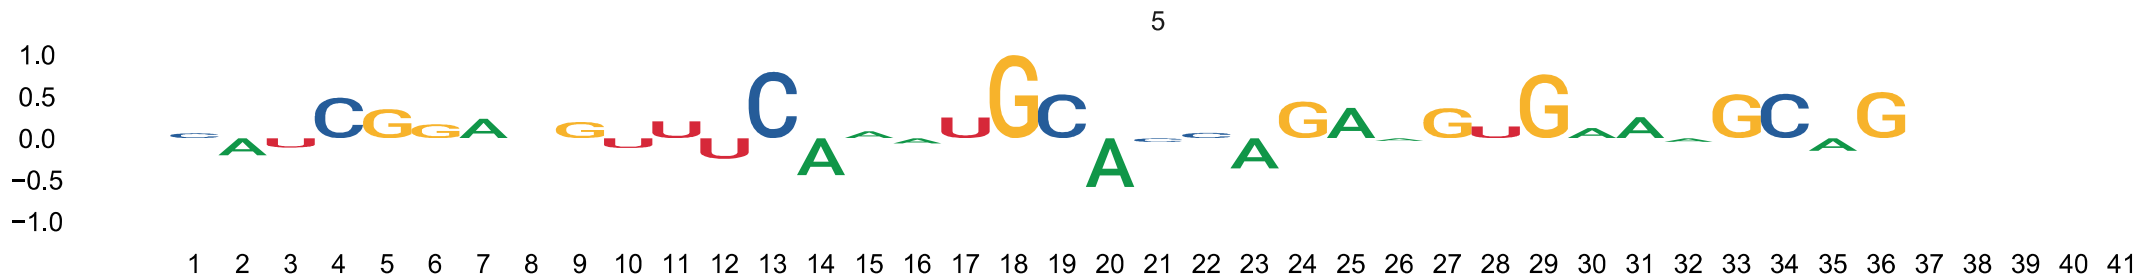

1

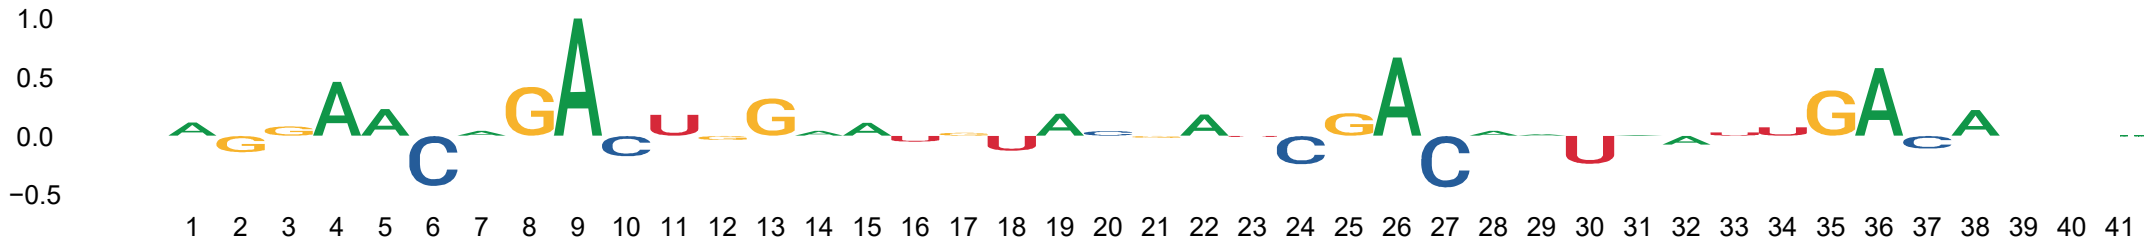

2

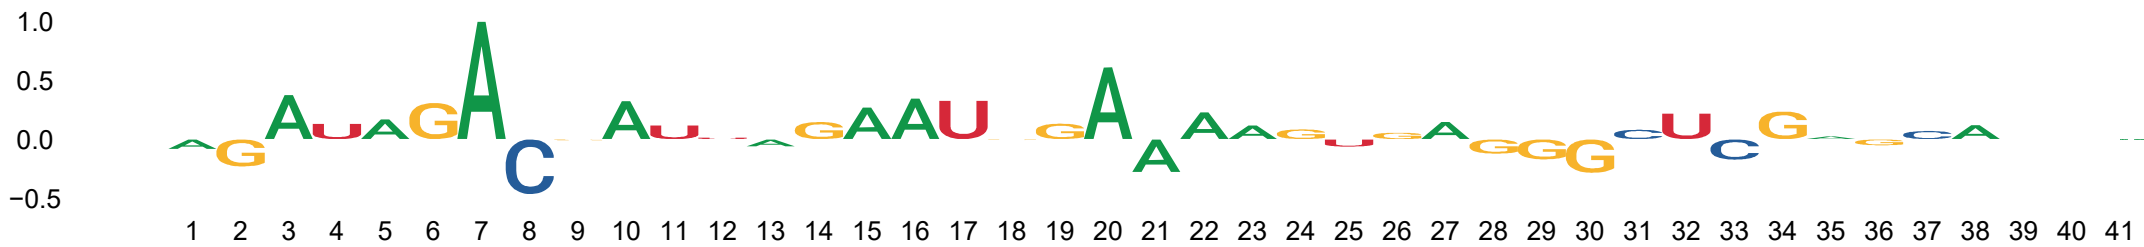

3

FXR2\_K562

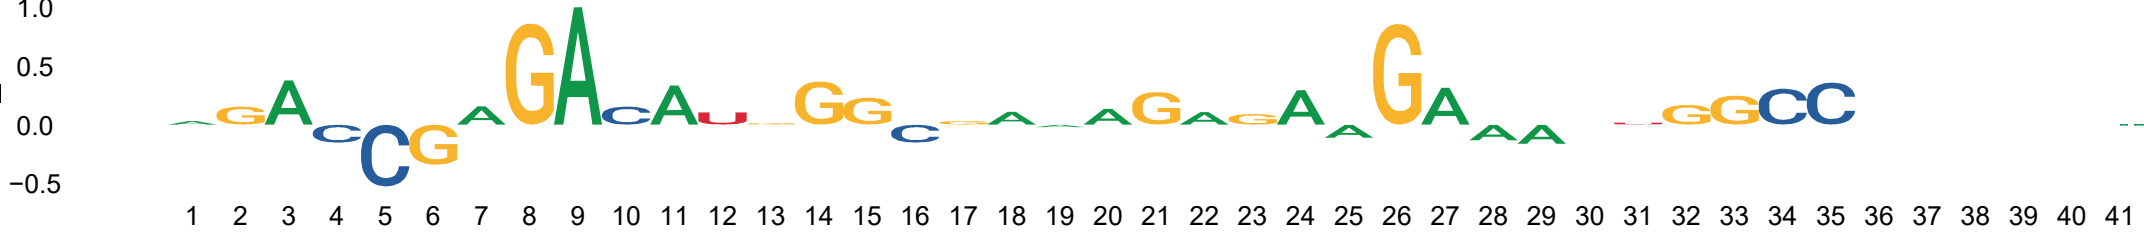

4

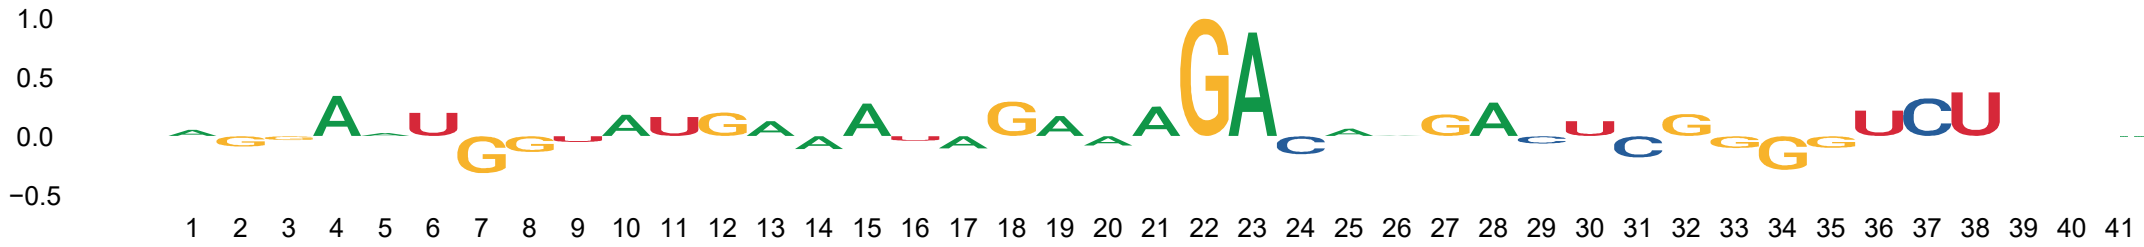

5

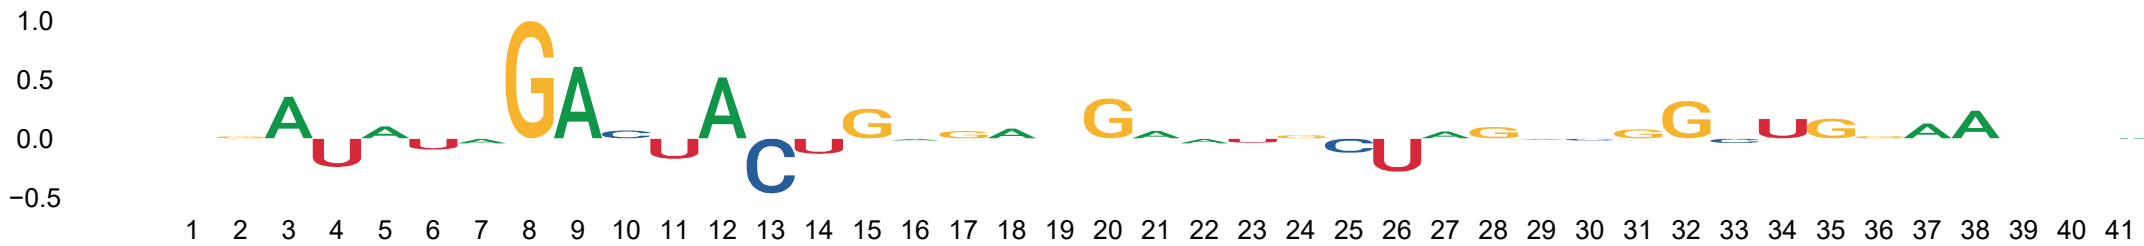

HNRNPA1\_K562

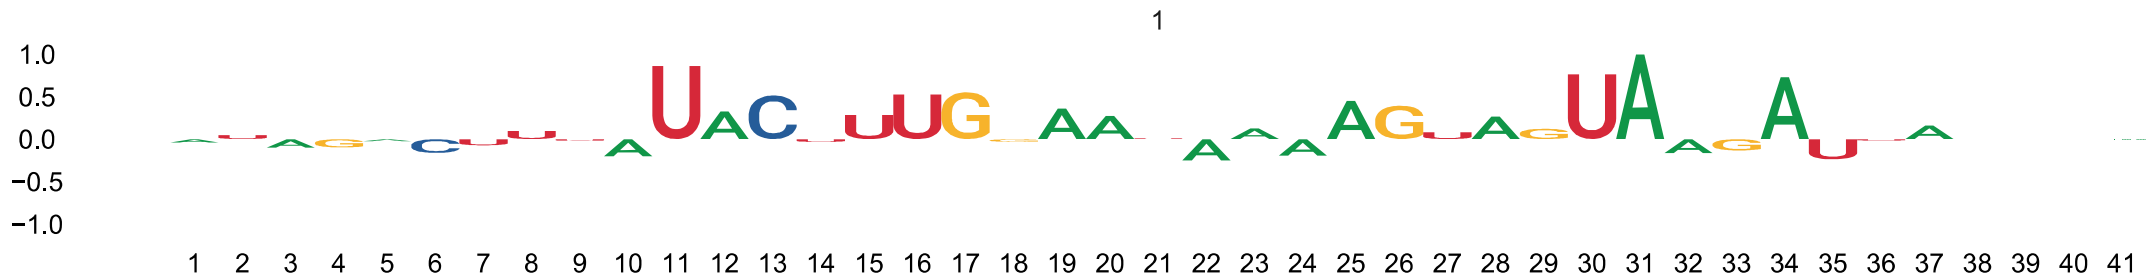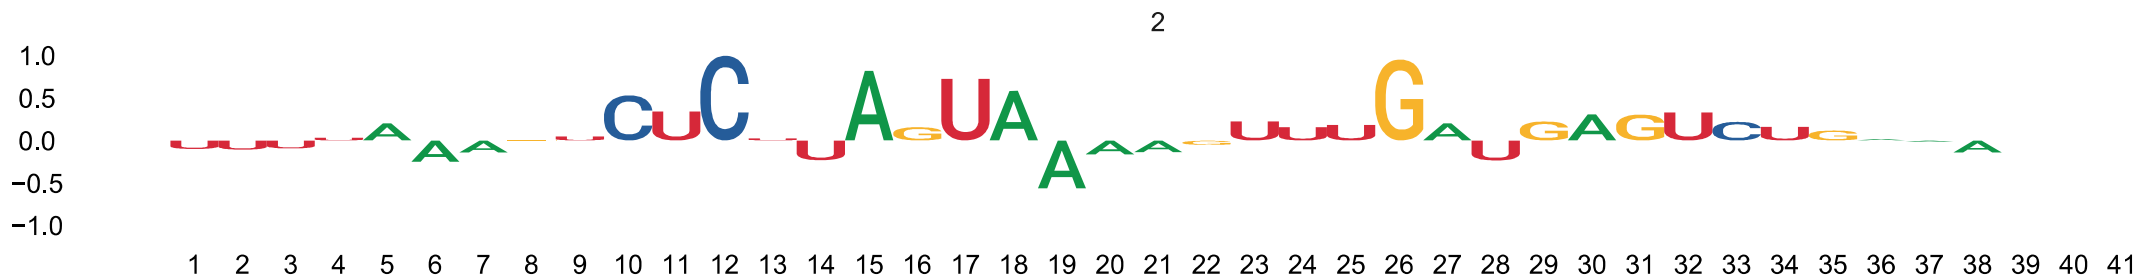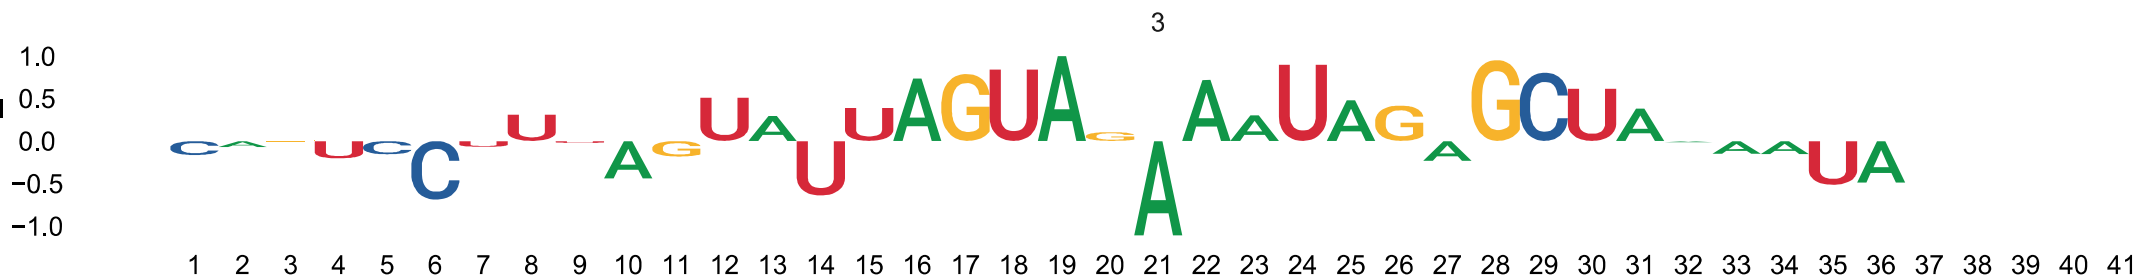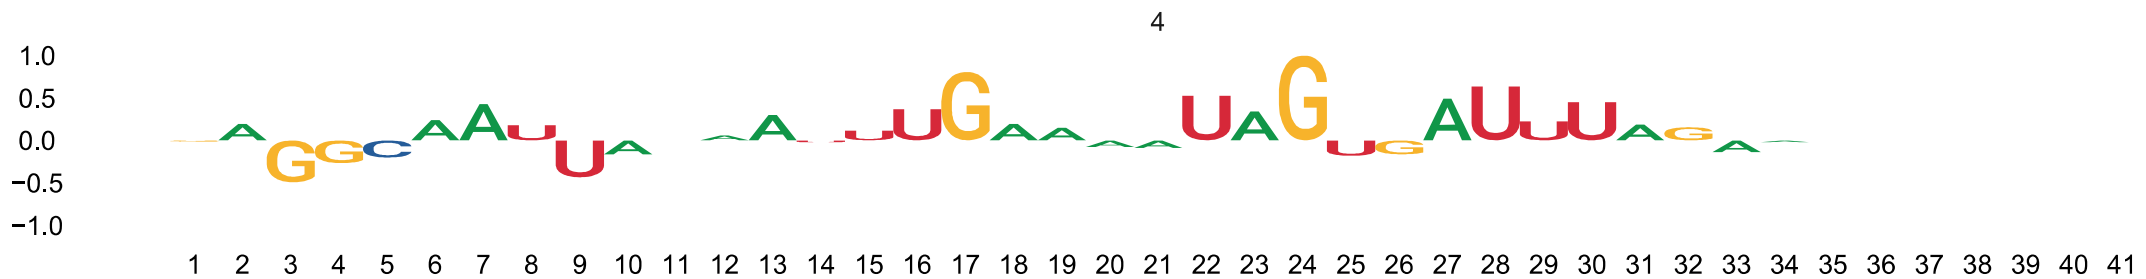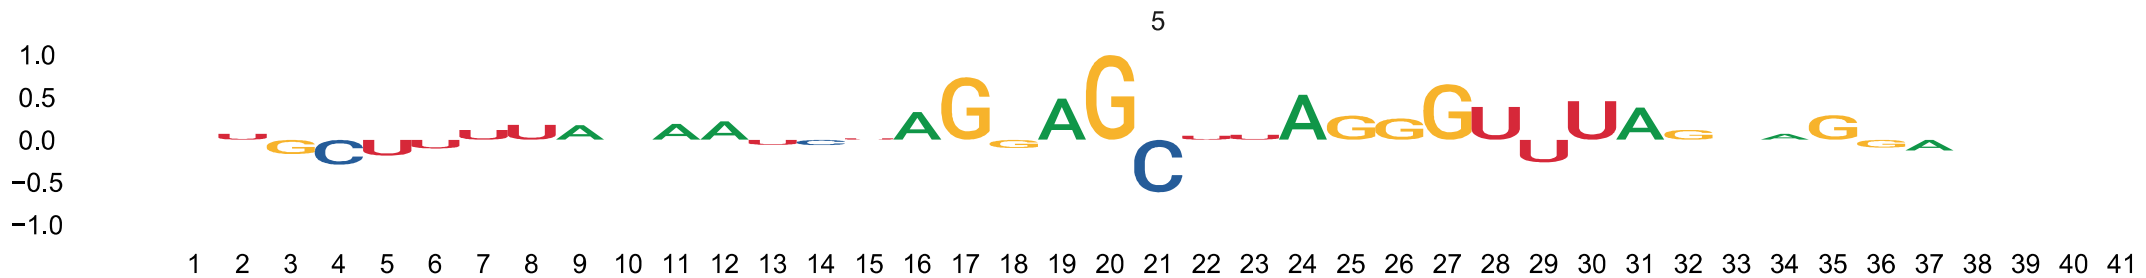

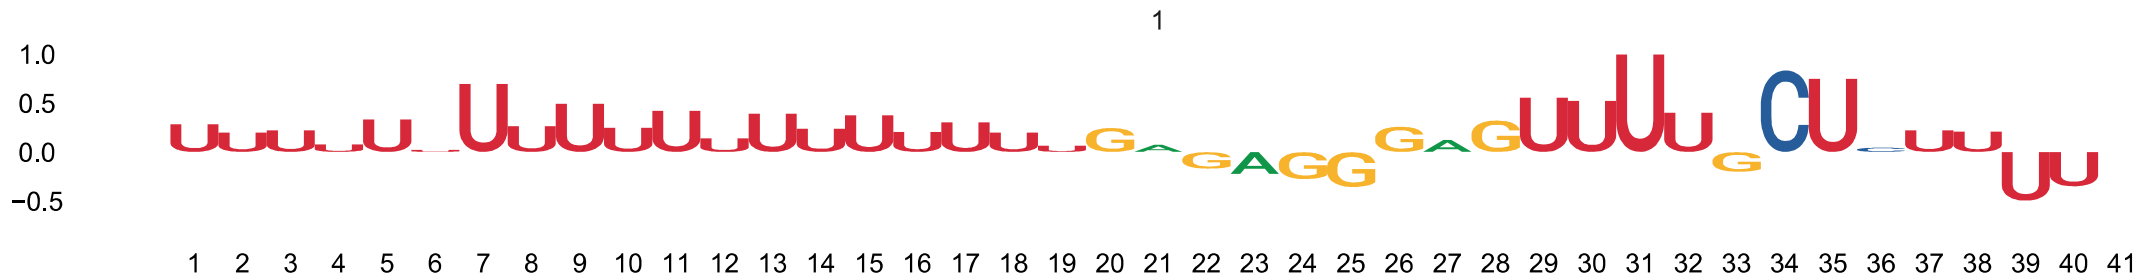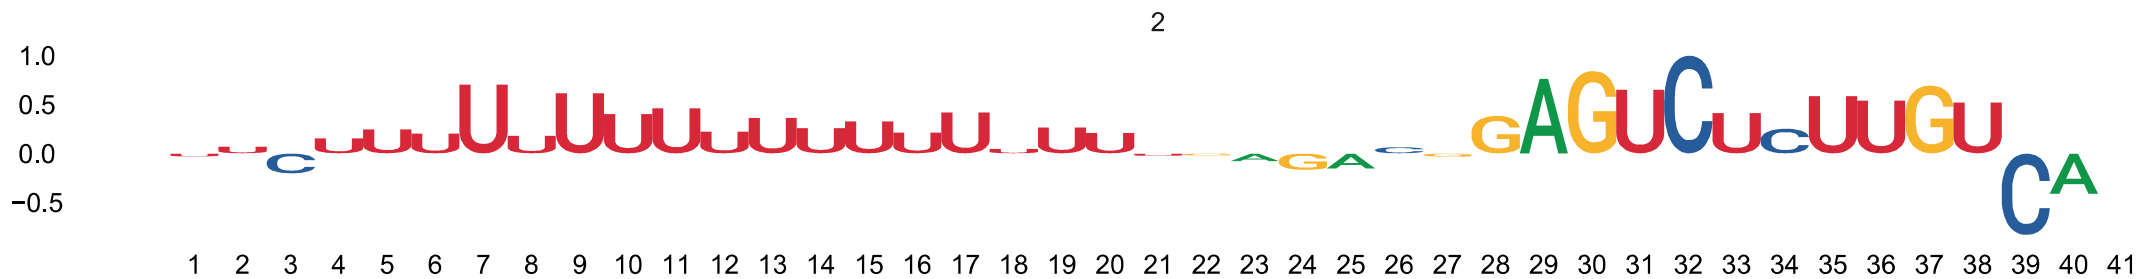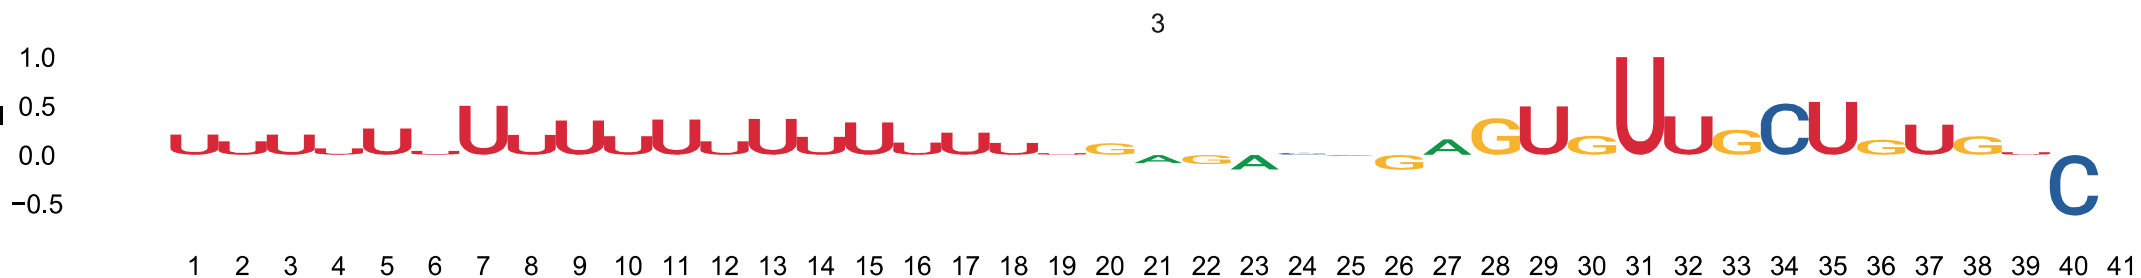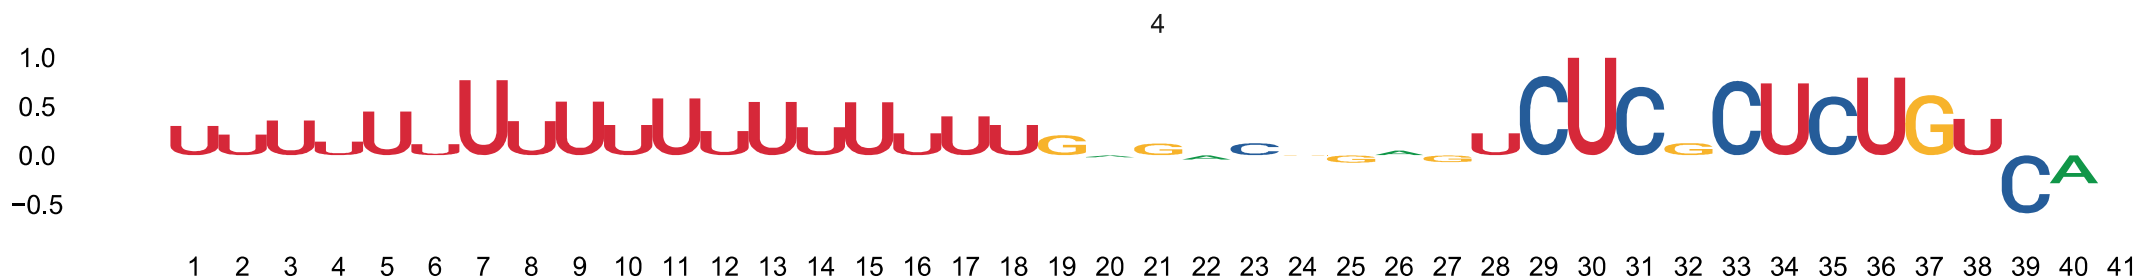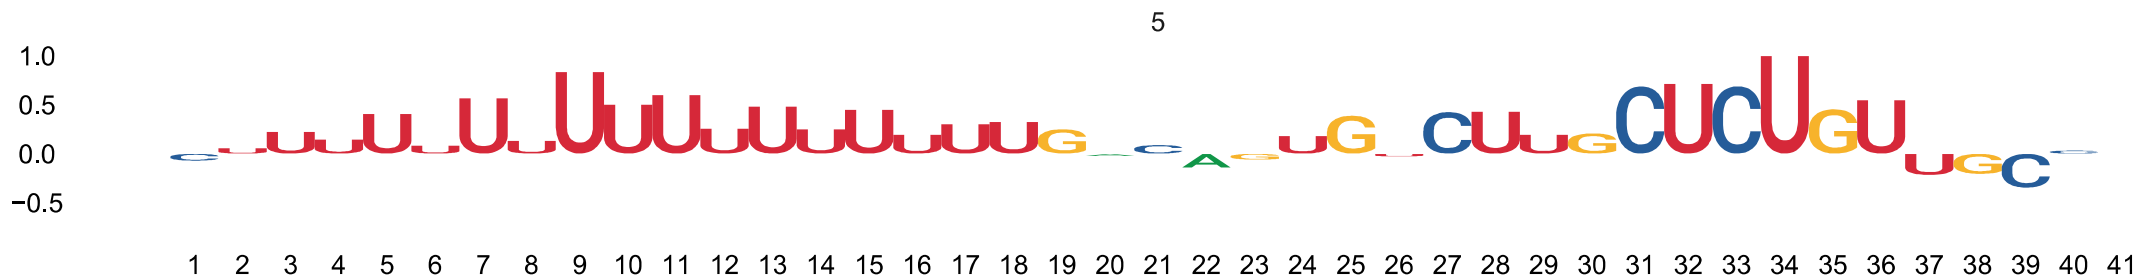

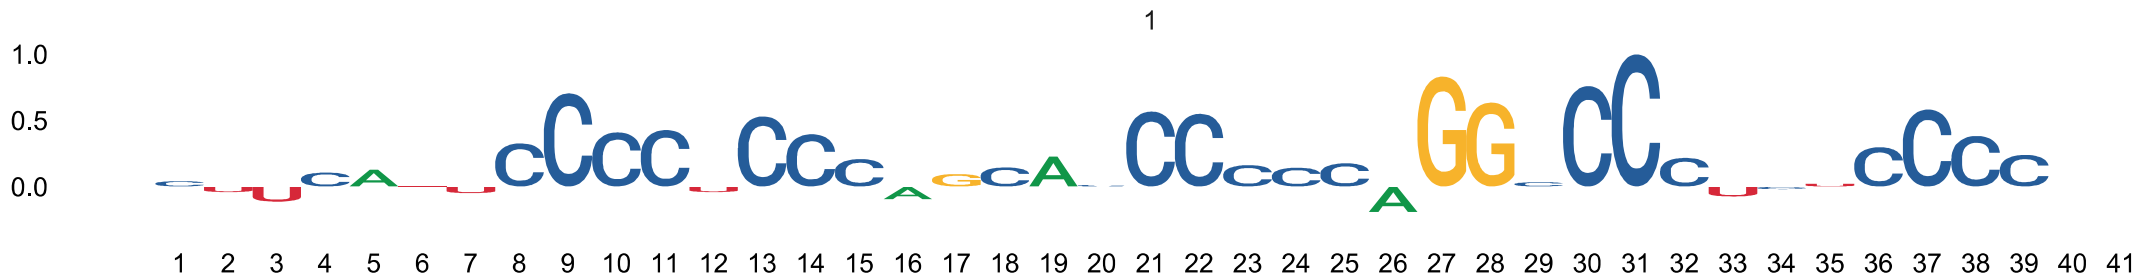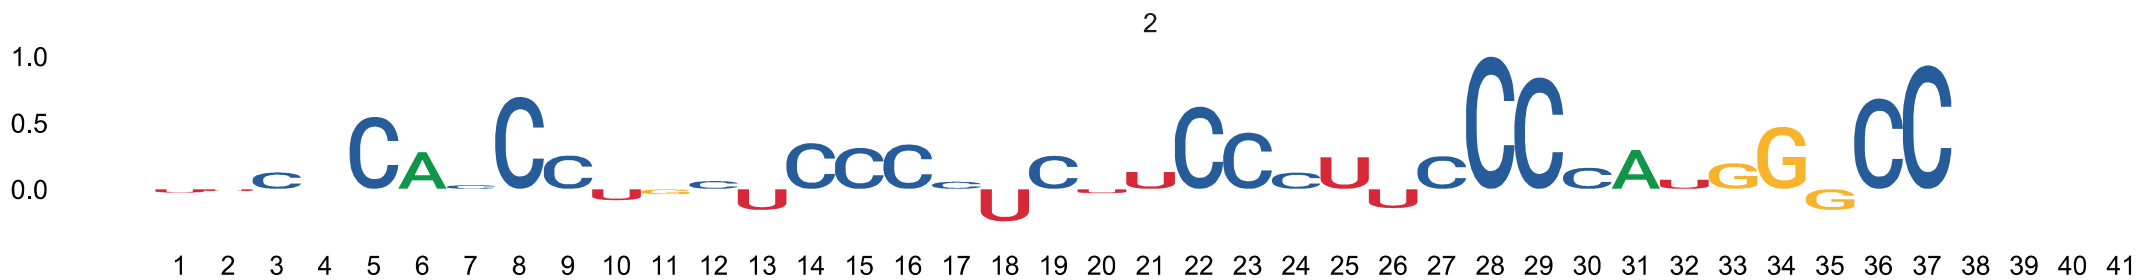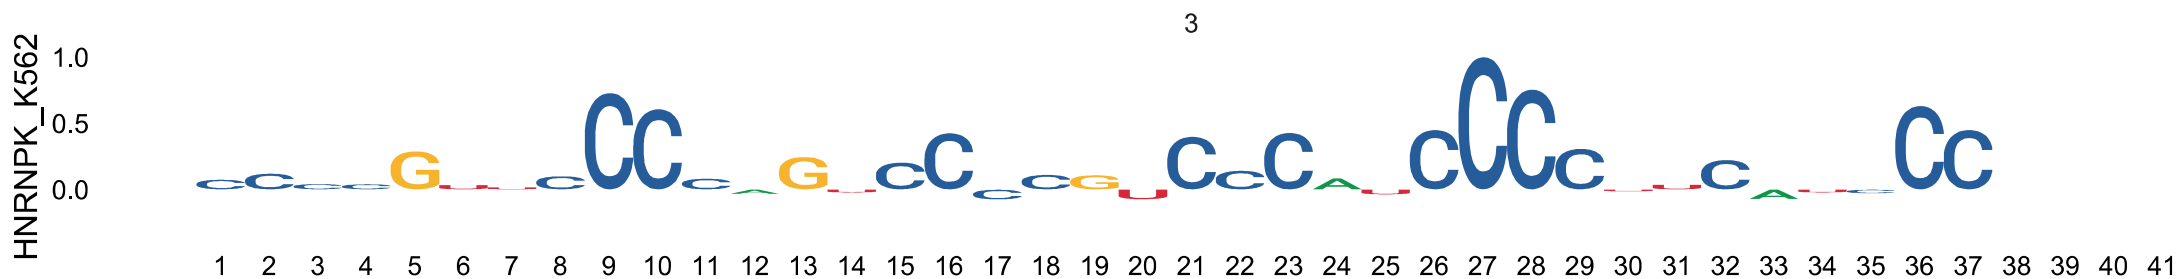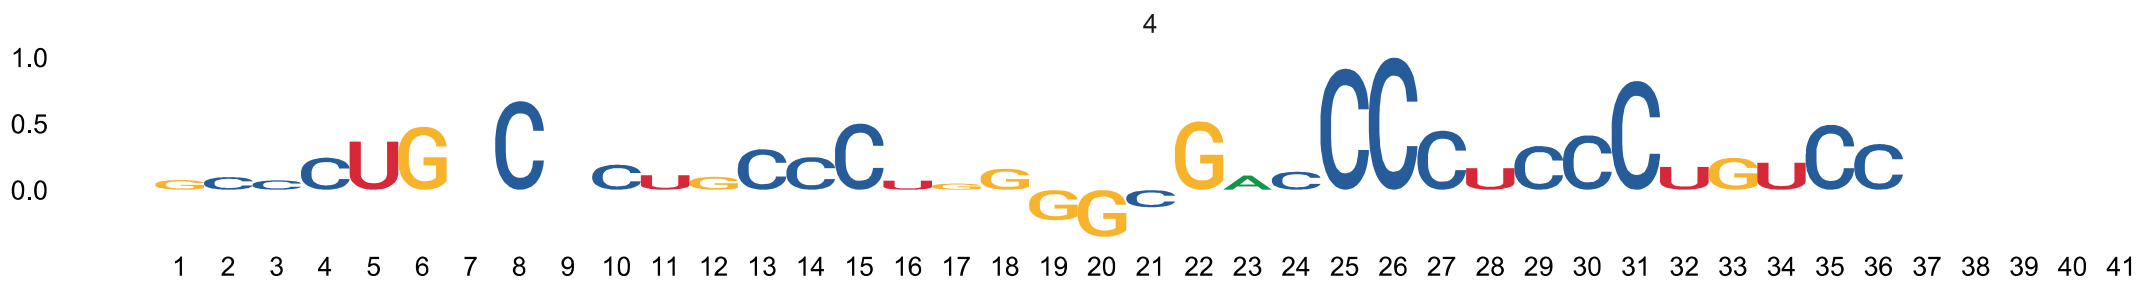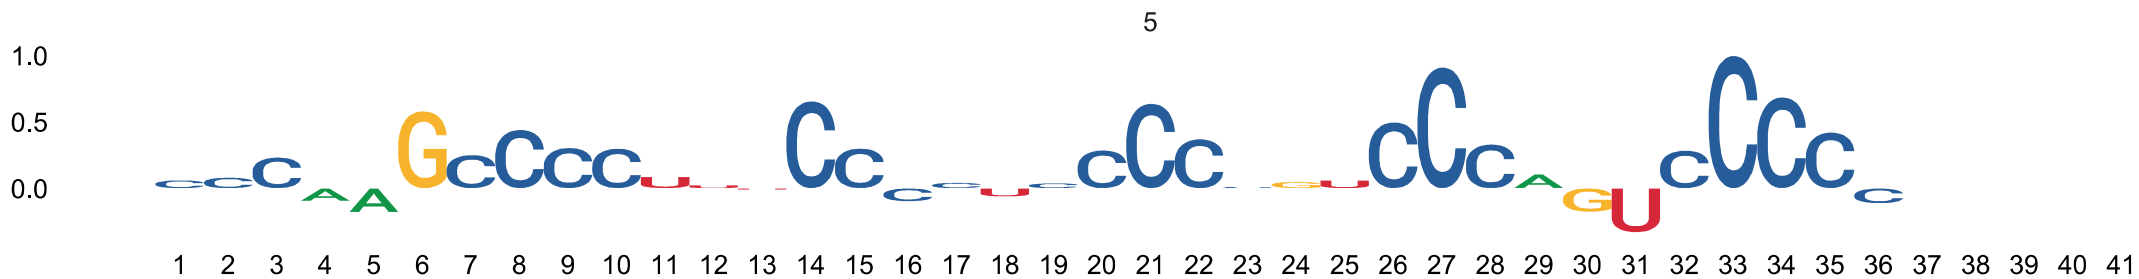



HNRNPL\_K562

1

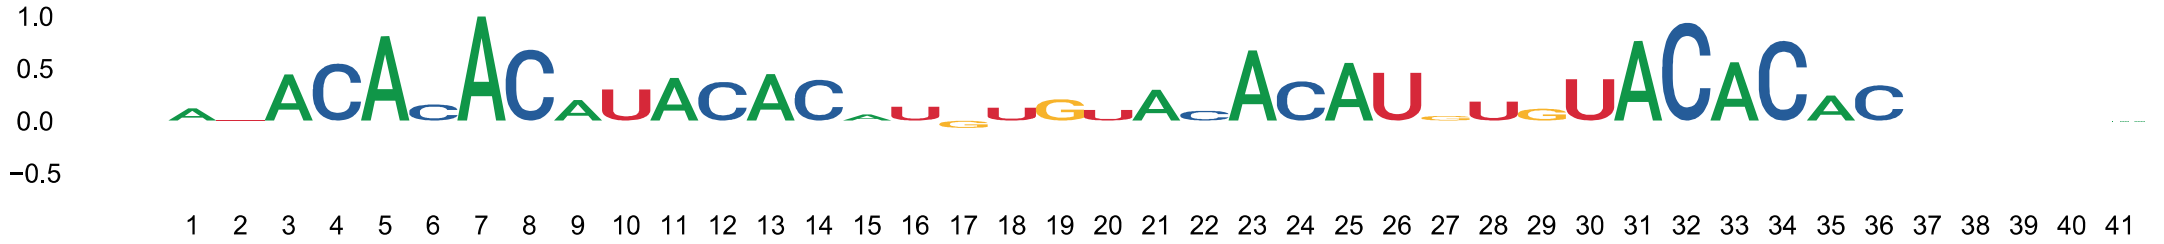

2

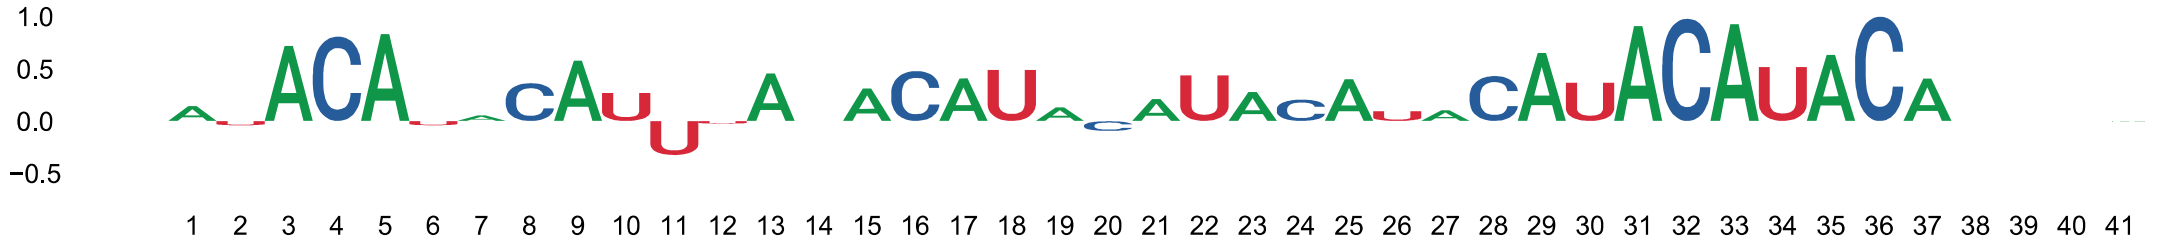

3

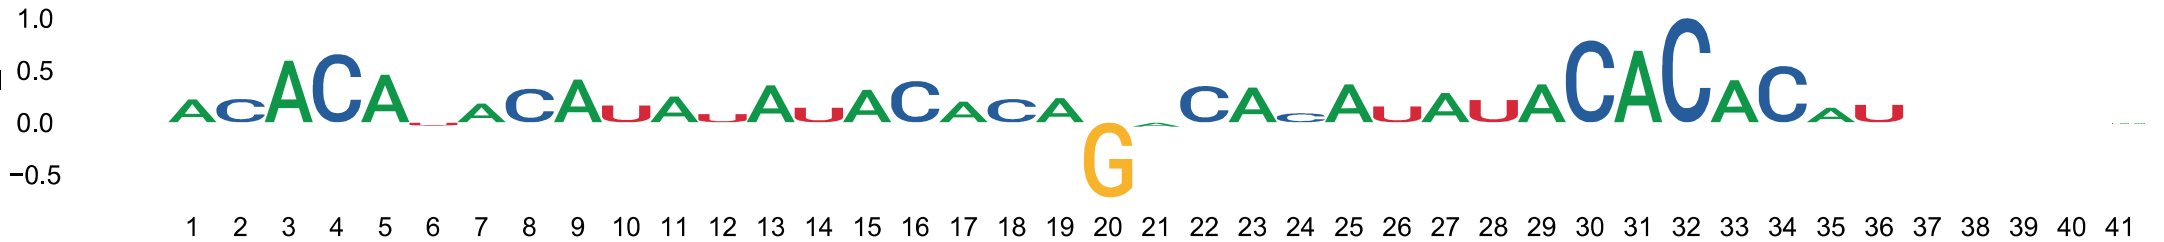

4

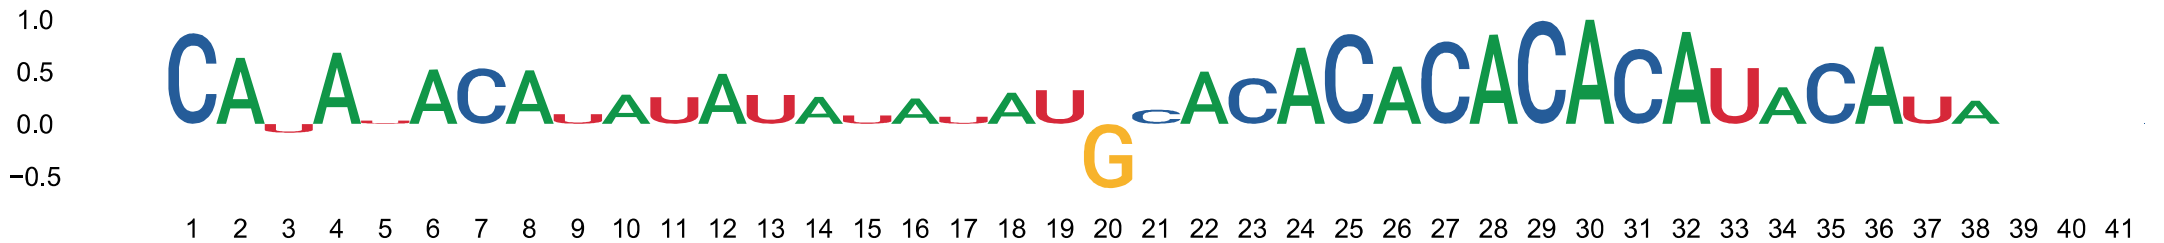

5

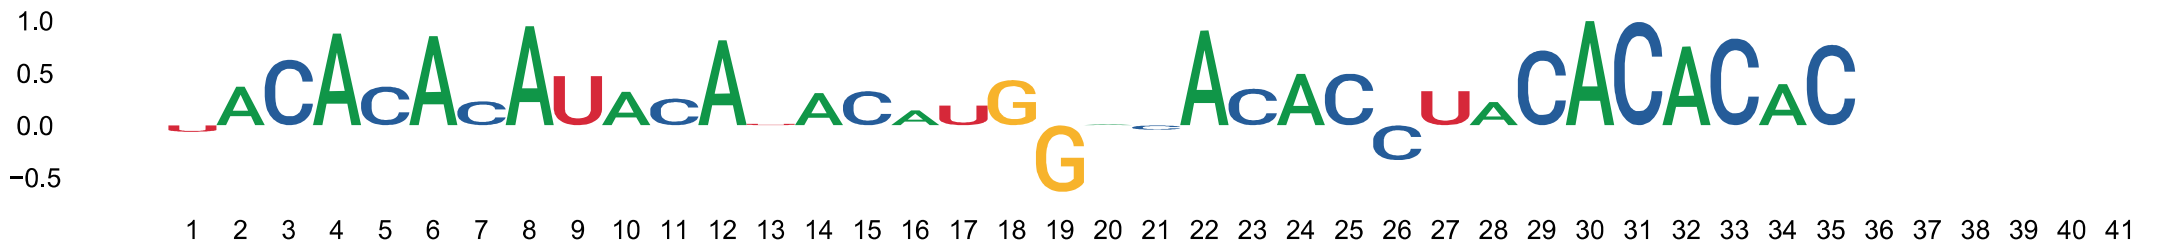

1

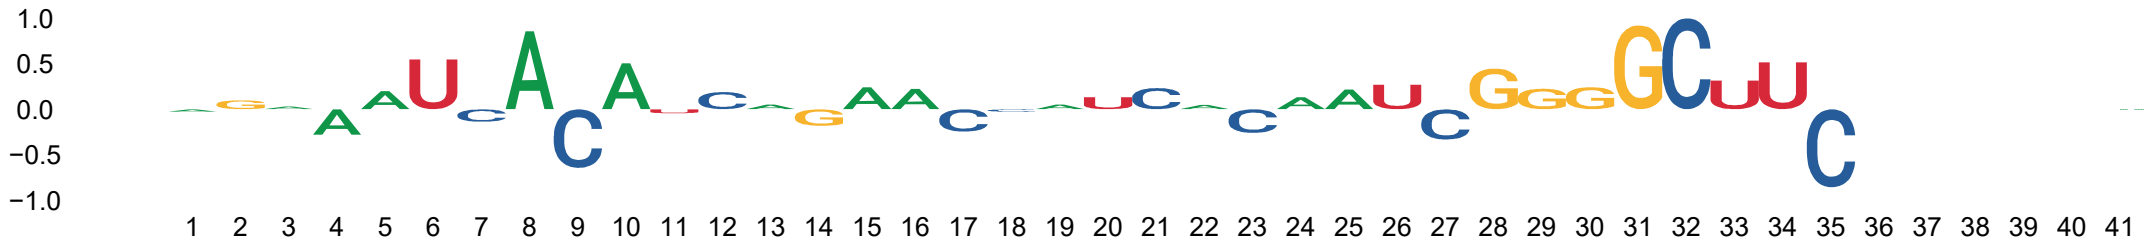

2

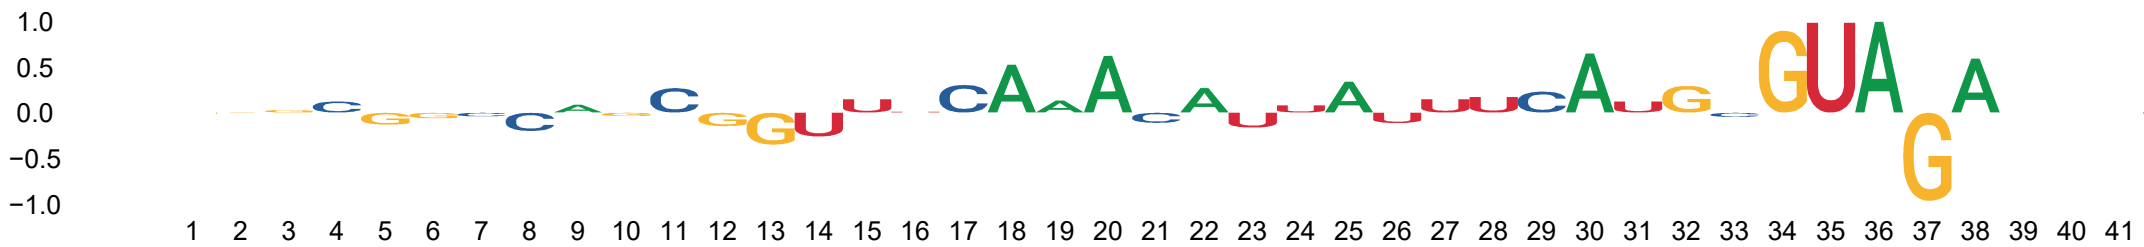

3

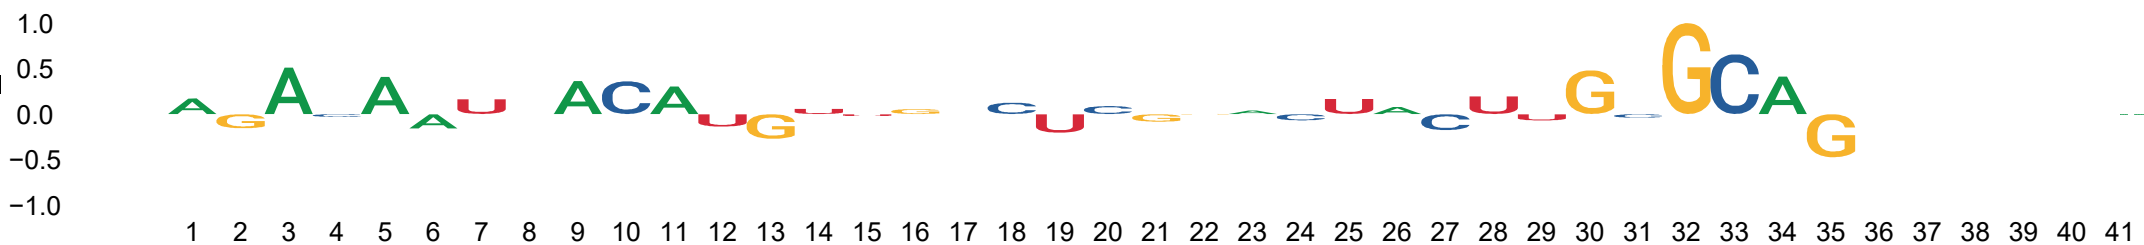

4

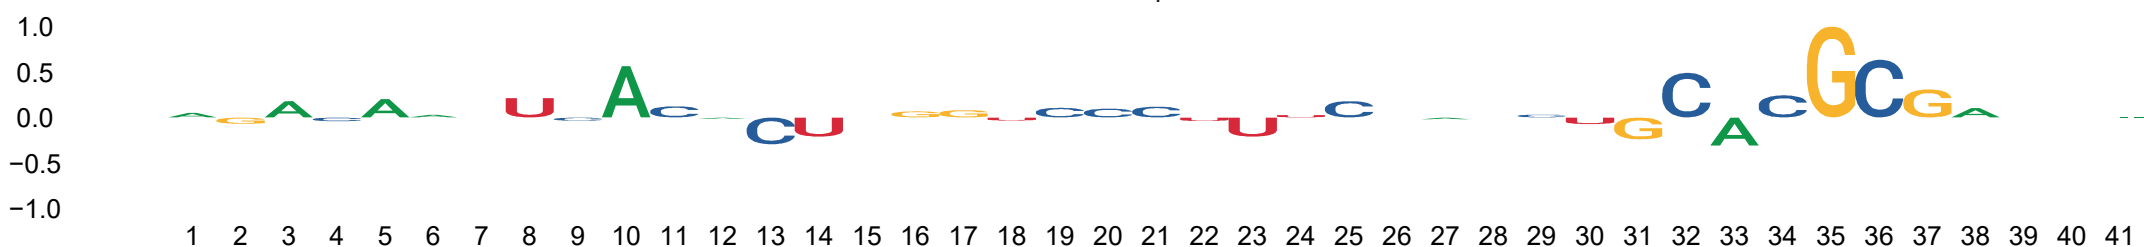

5

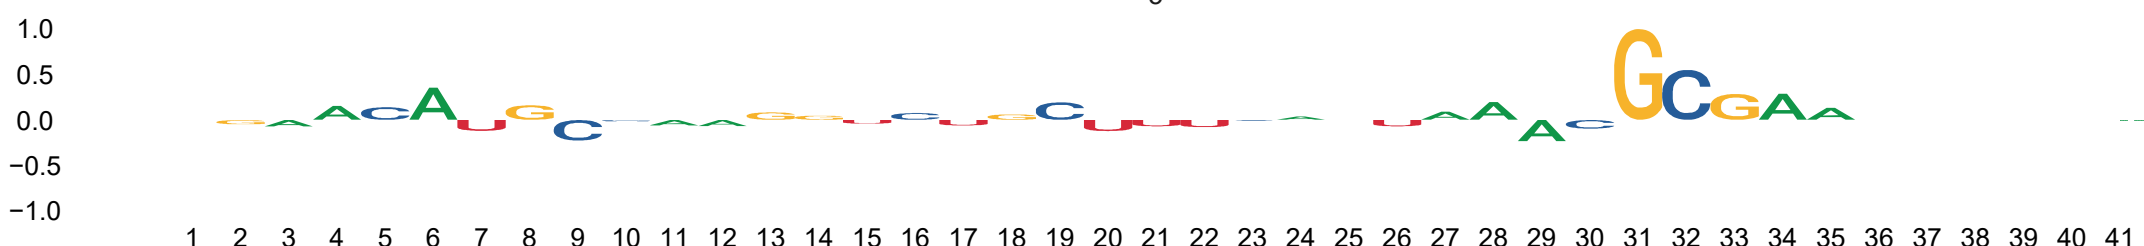

IGF2BP2\_K562

KHDRBS1\_K562

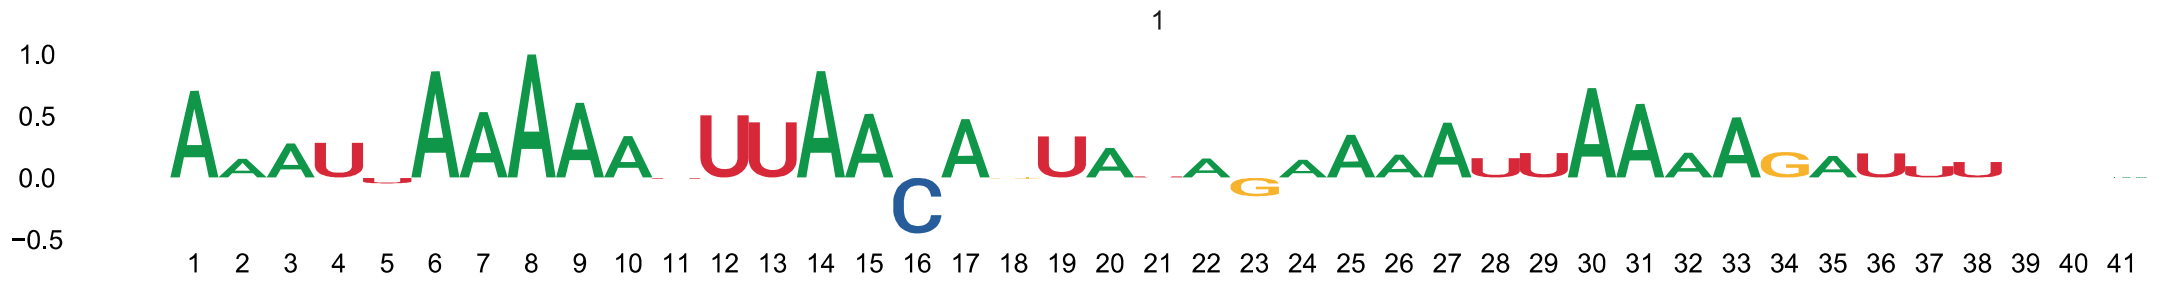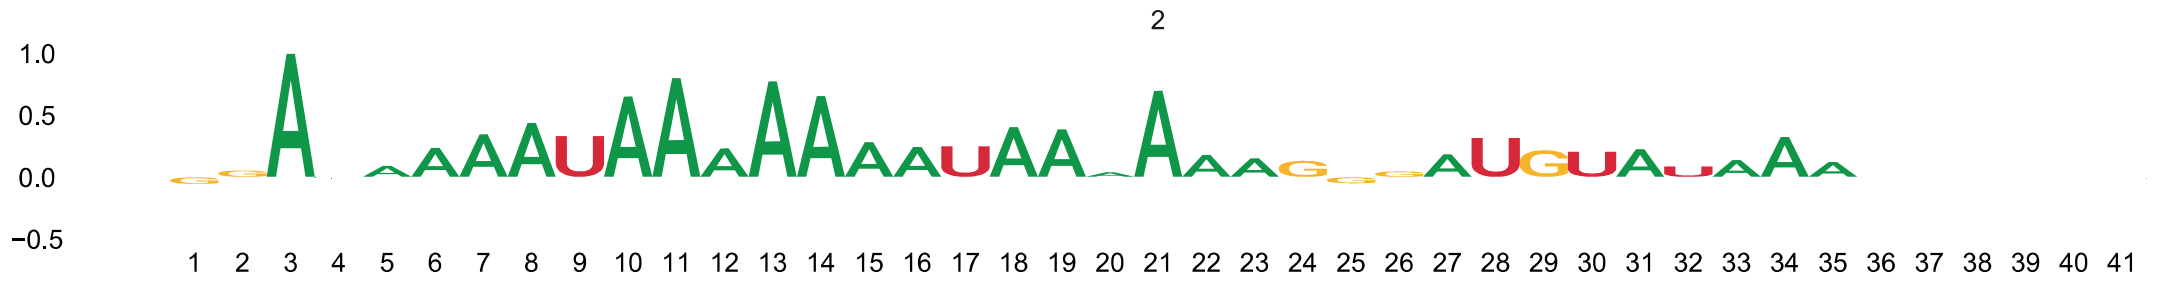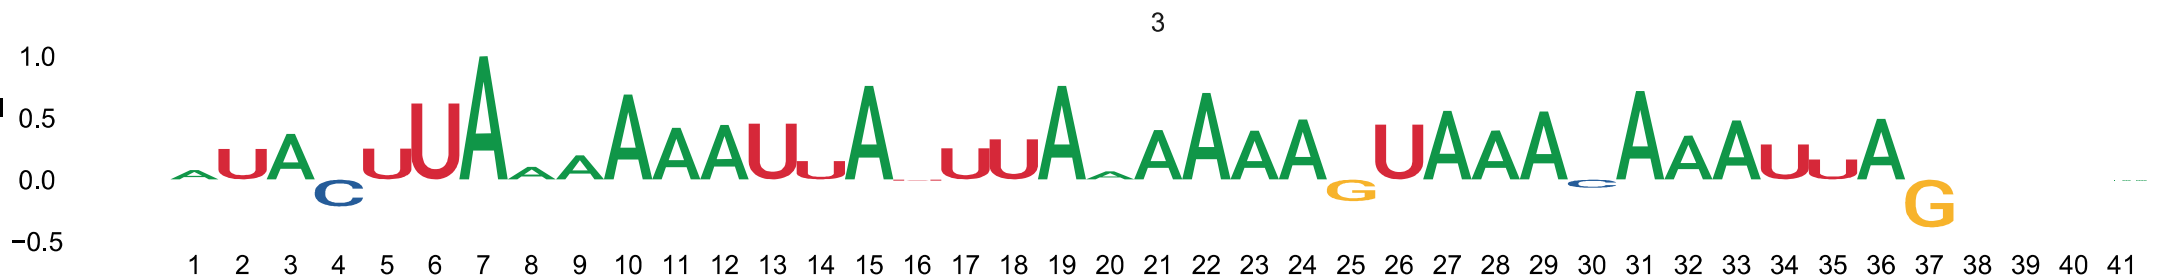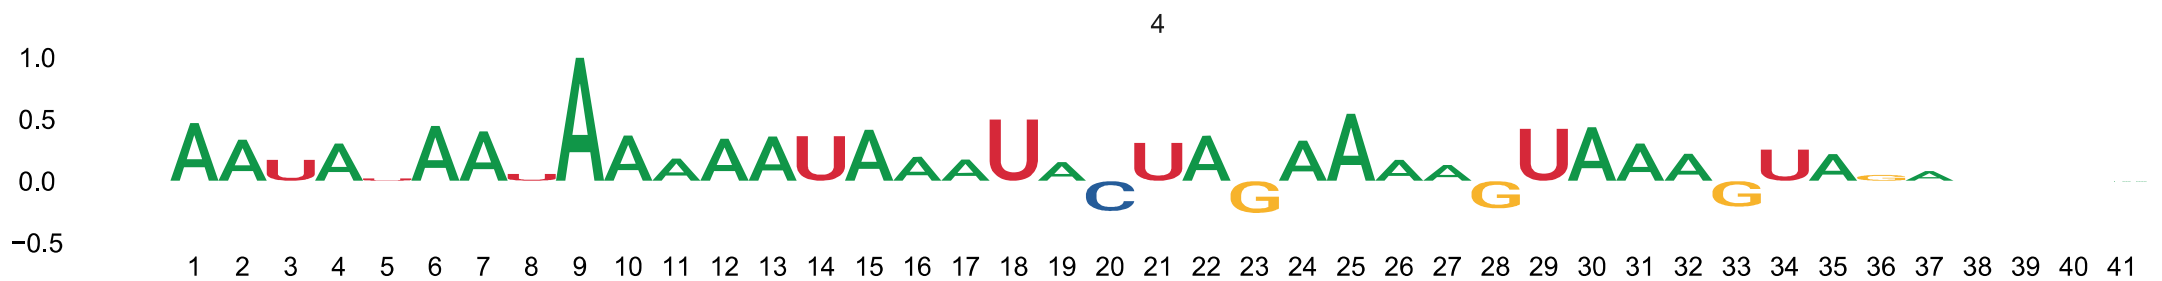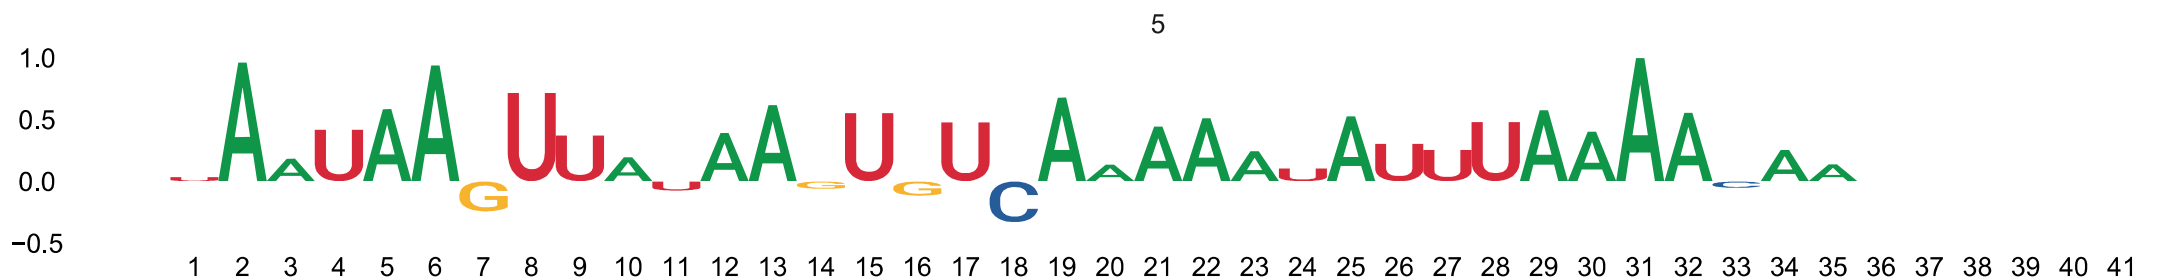

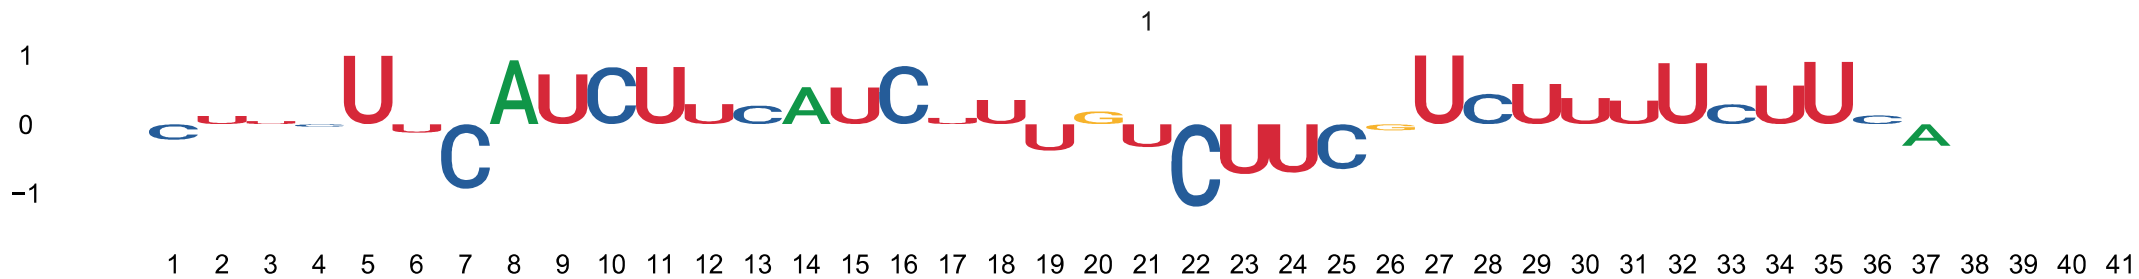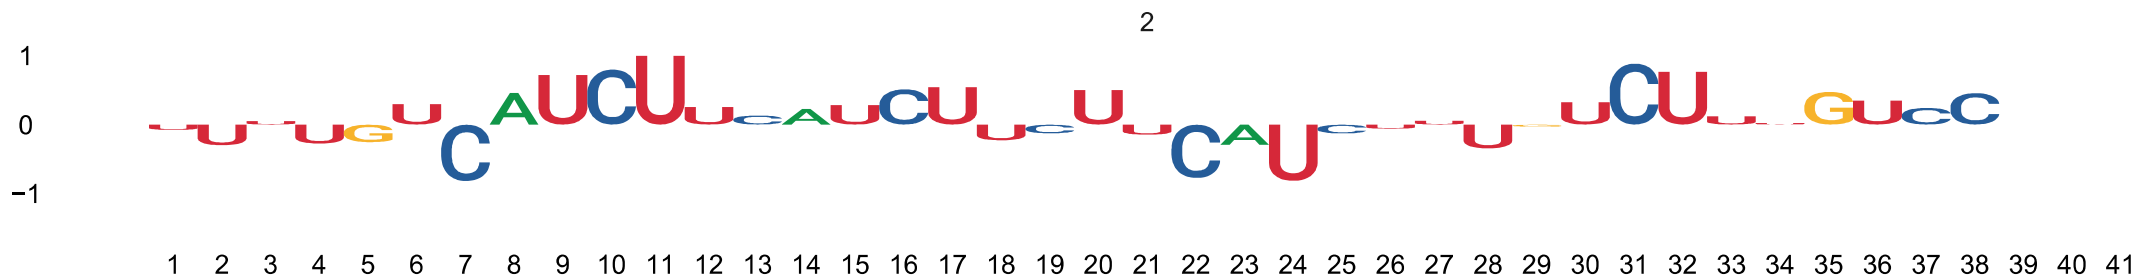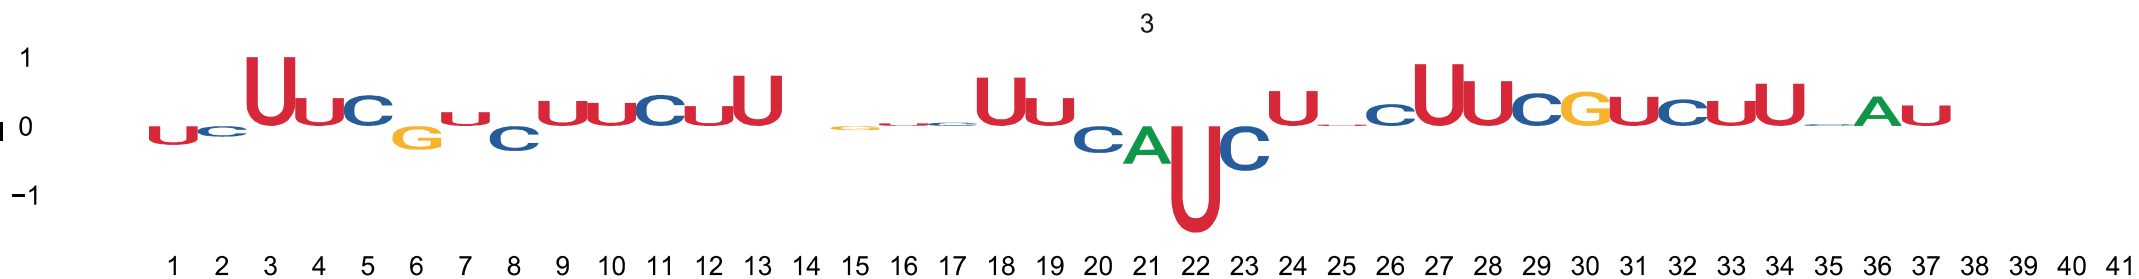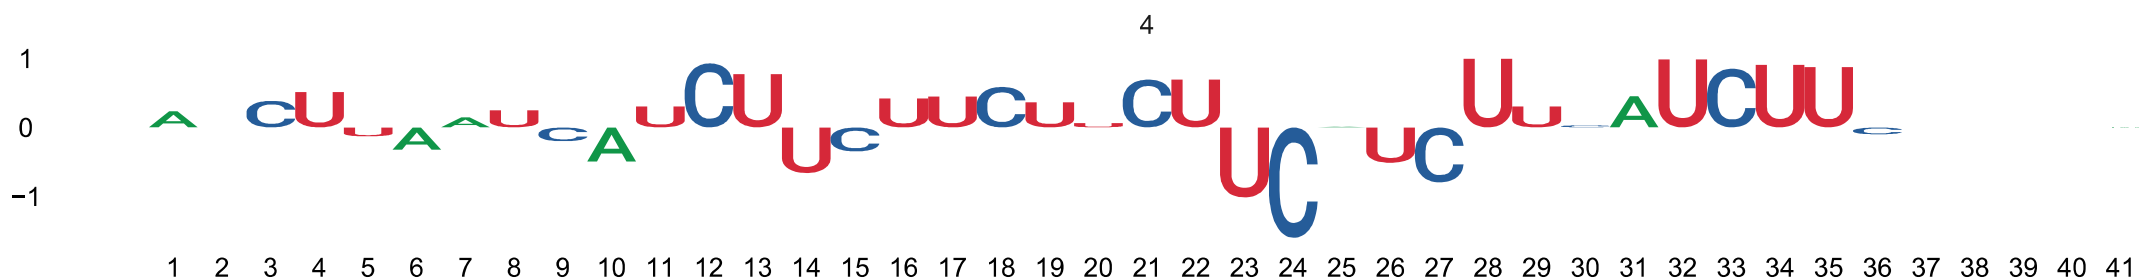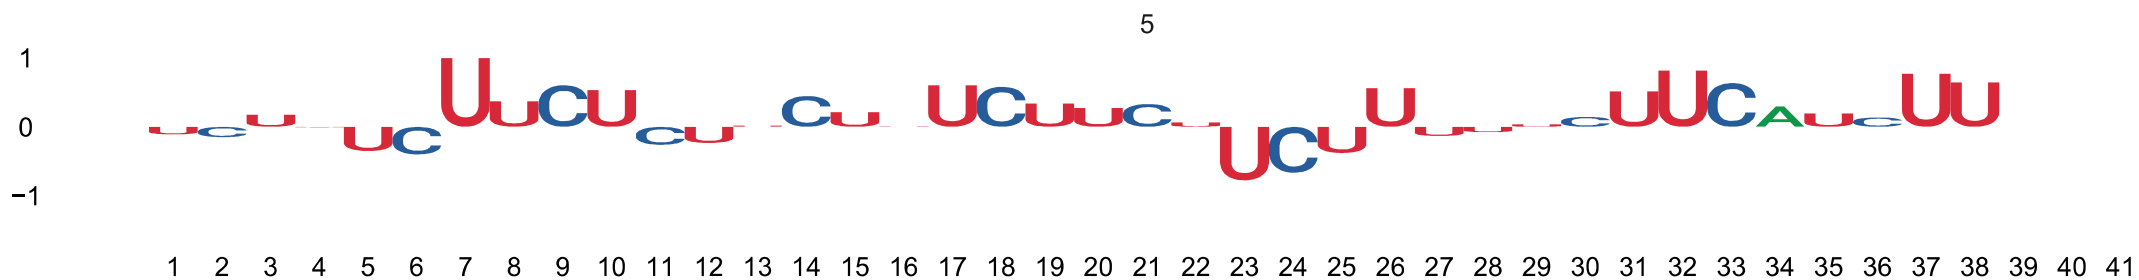

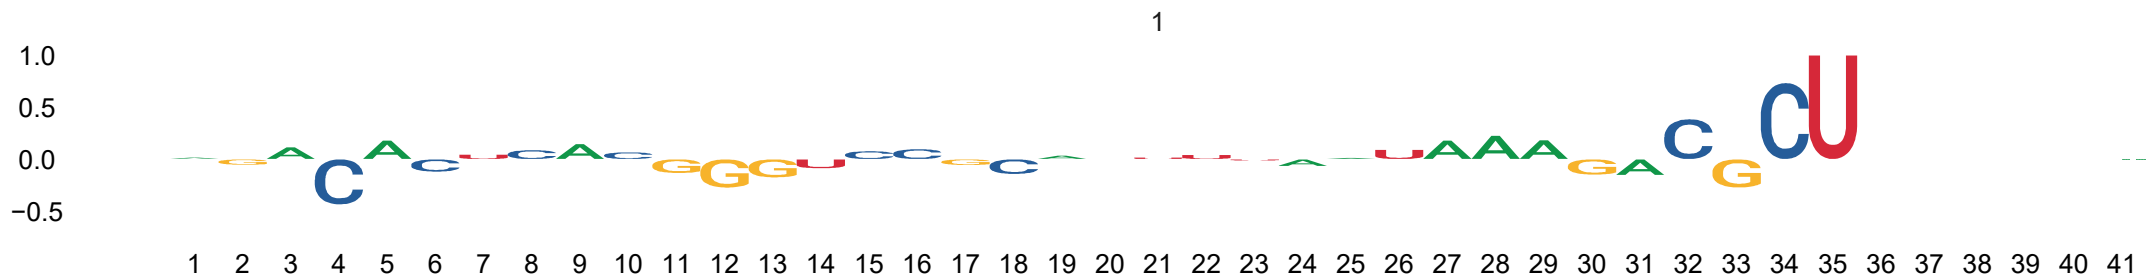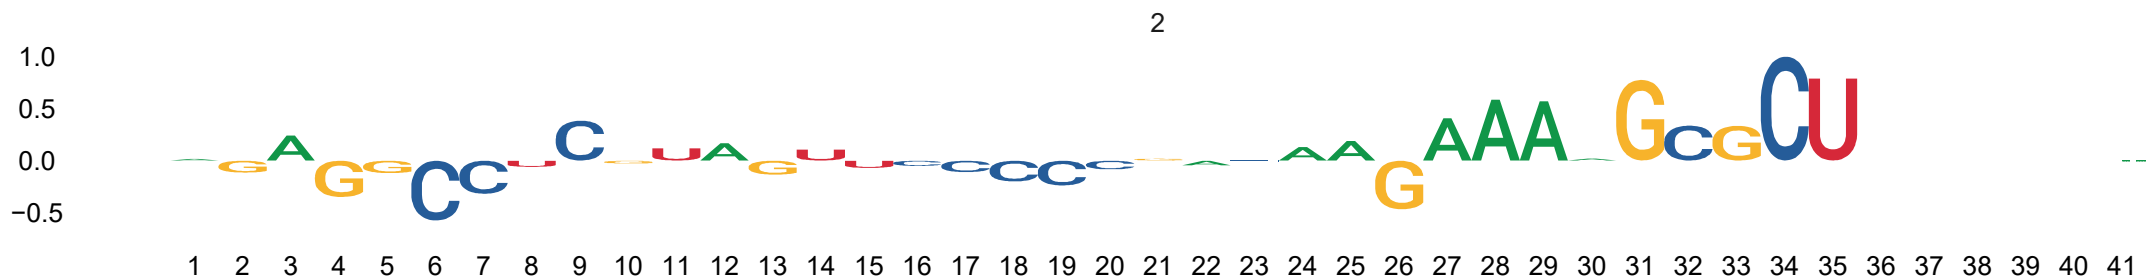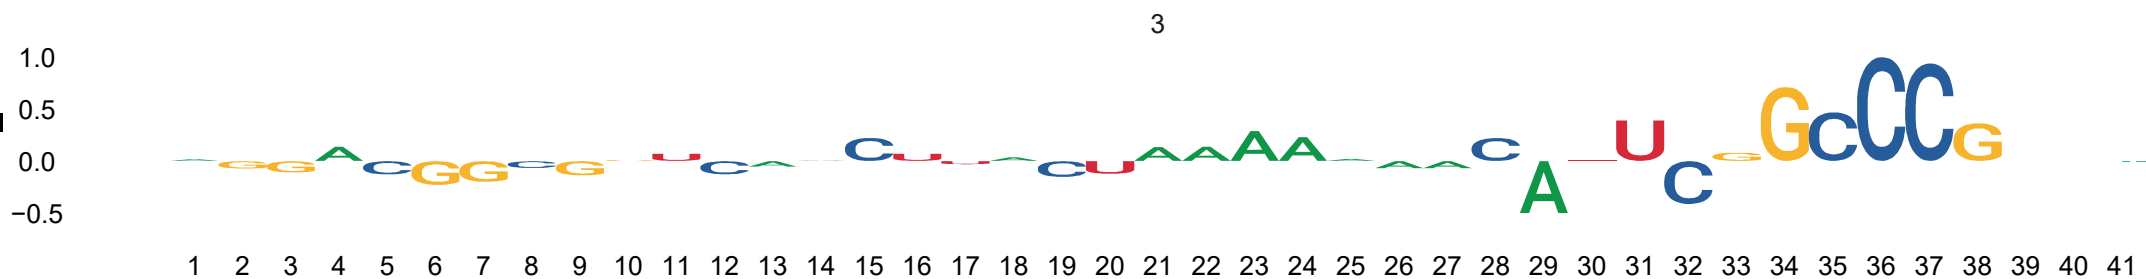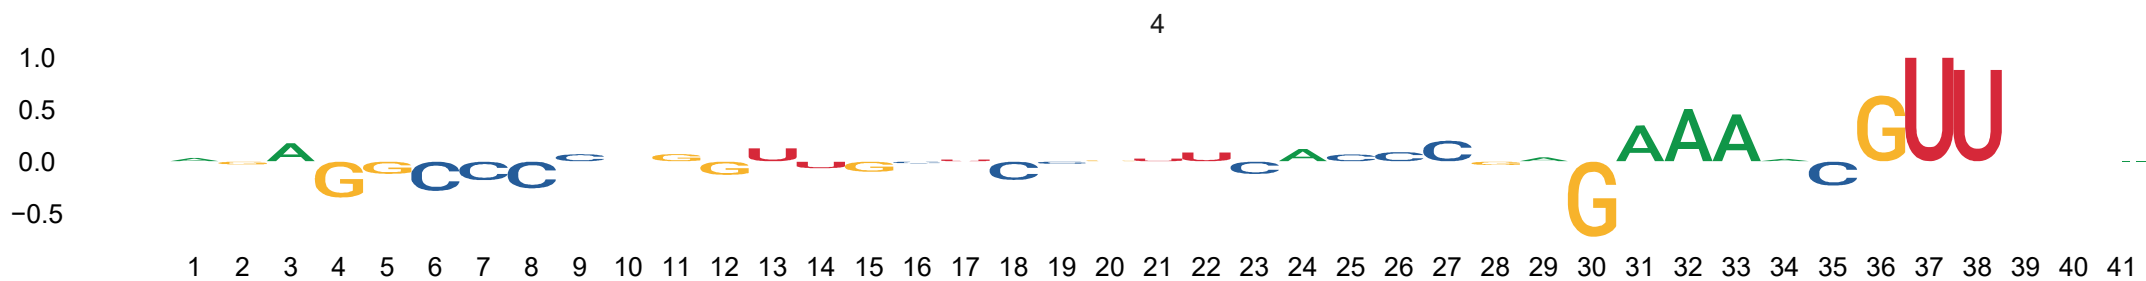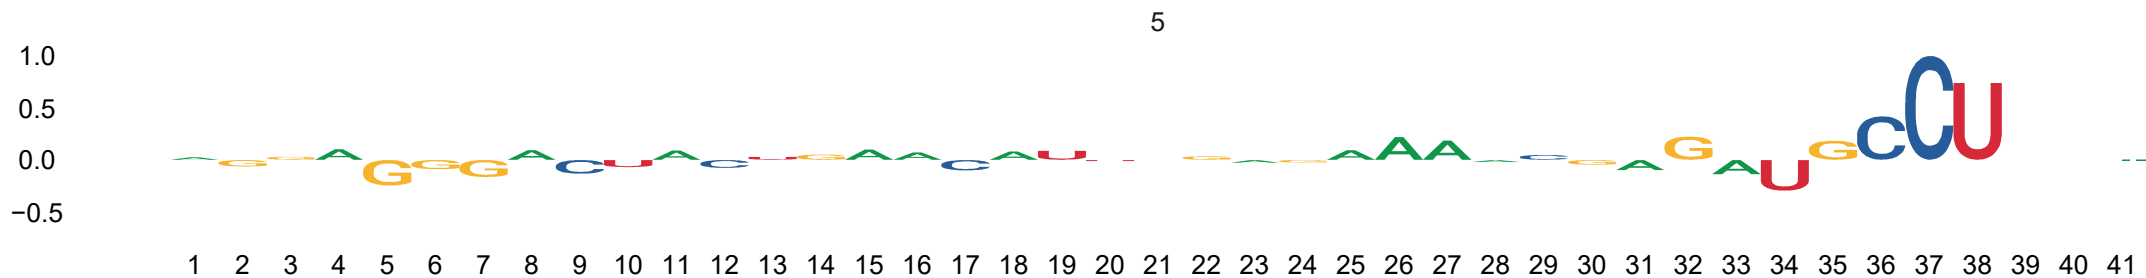

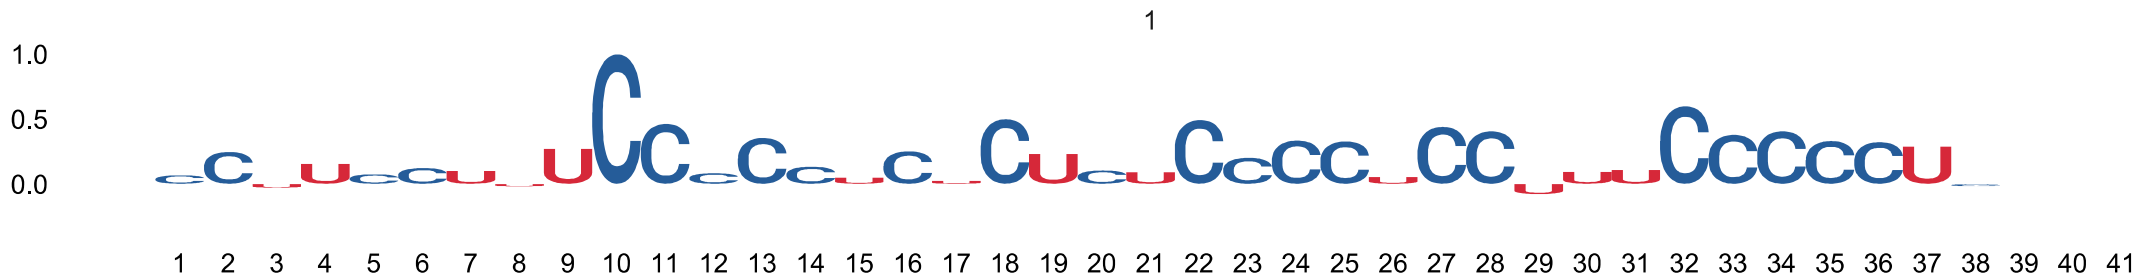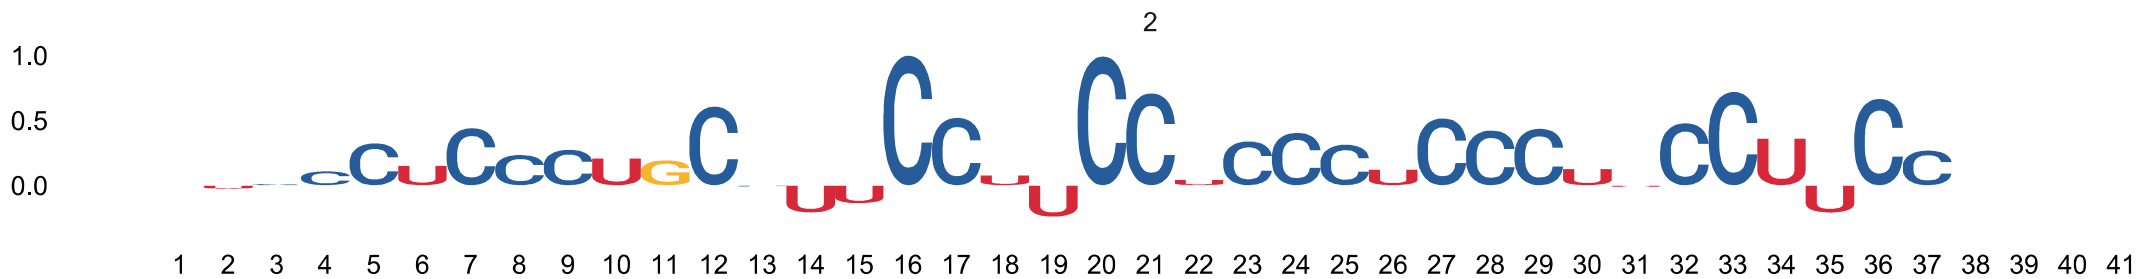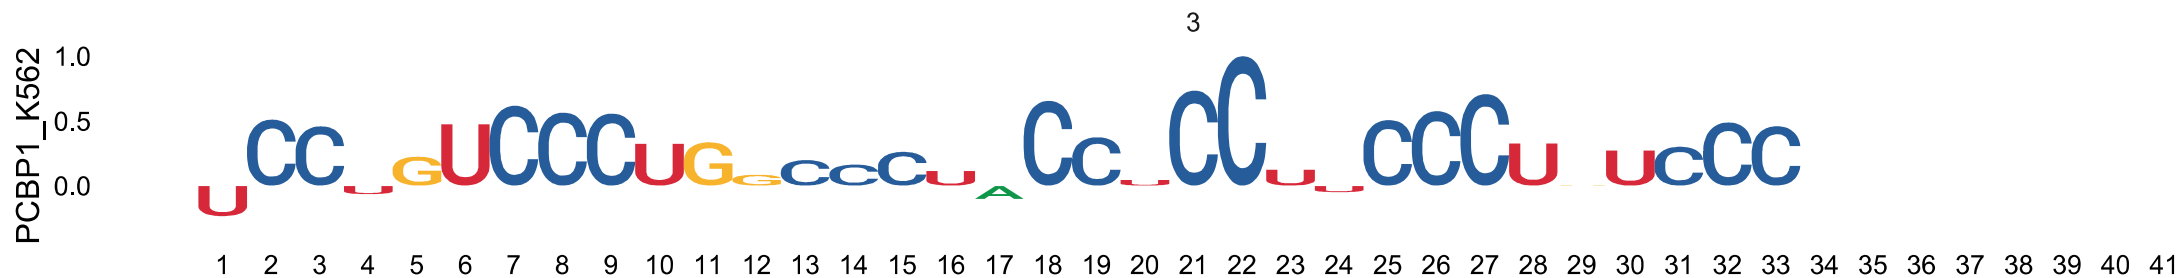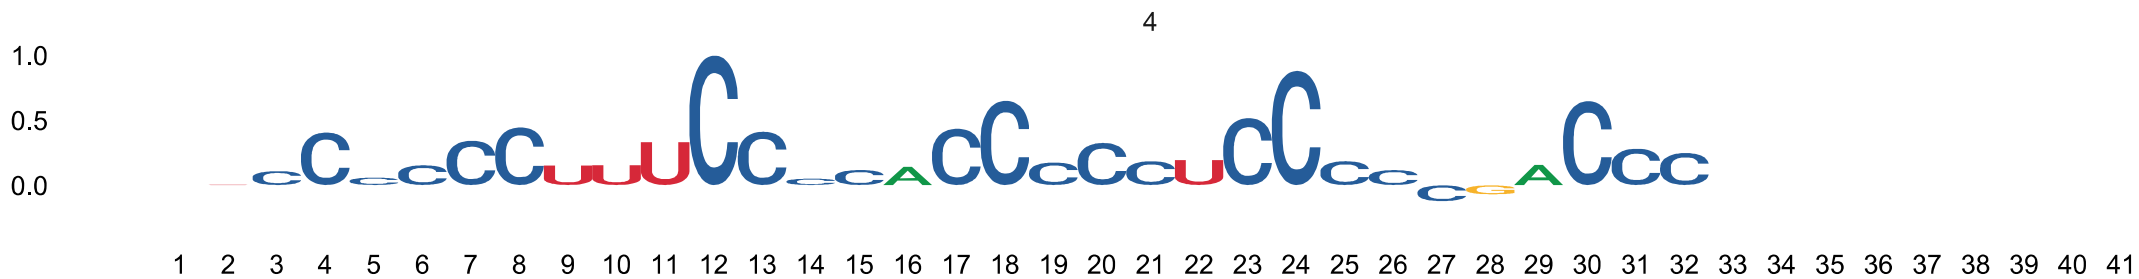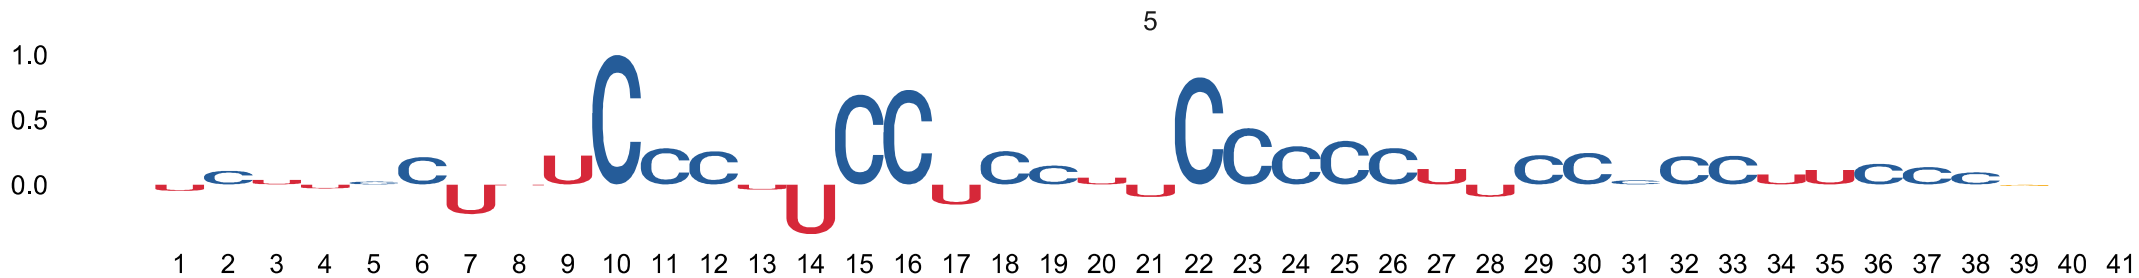

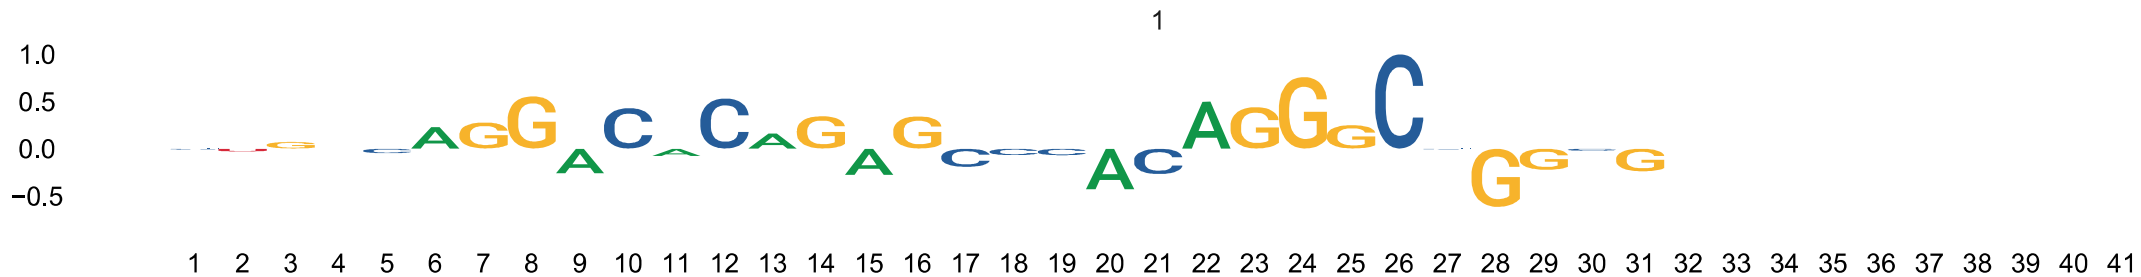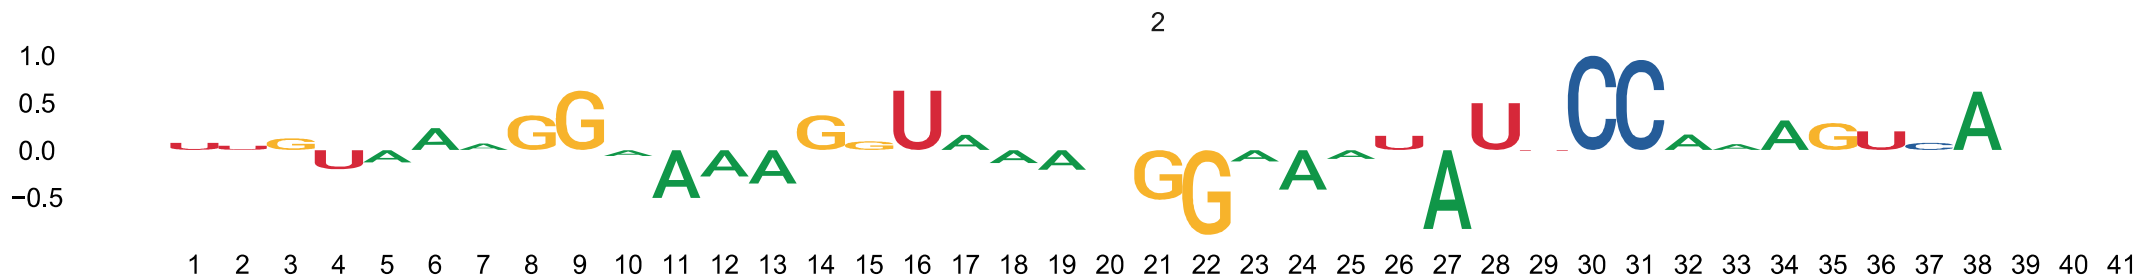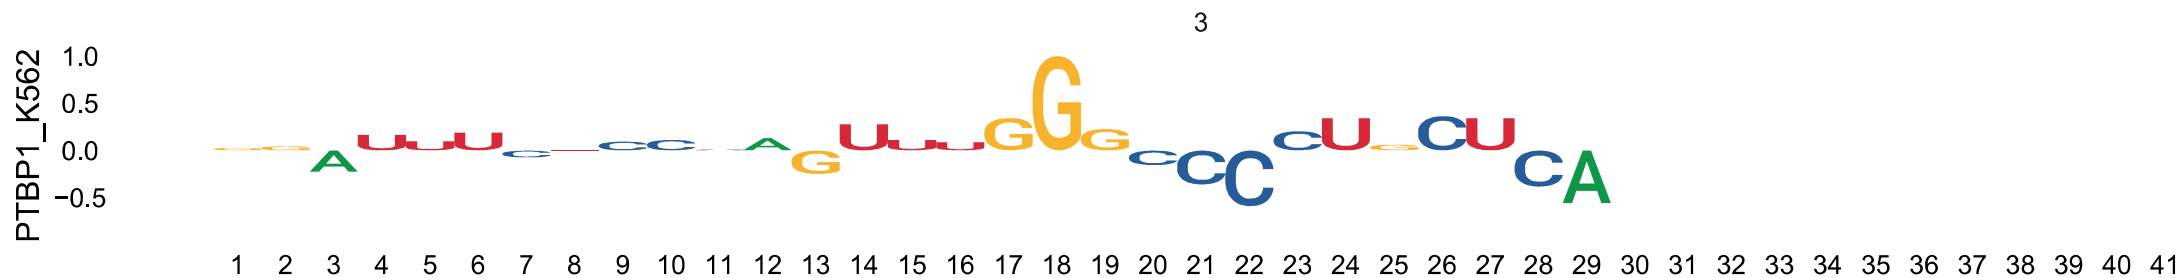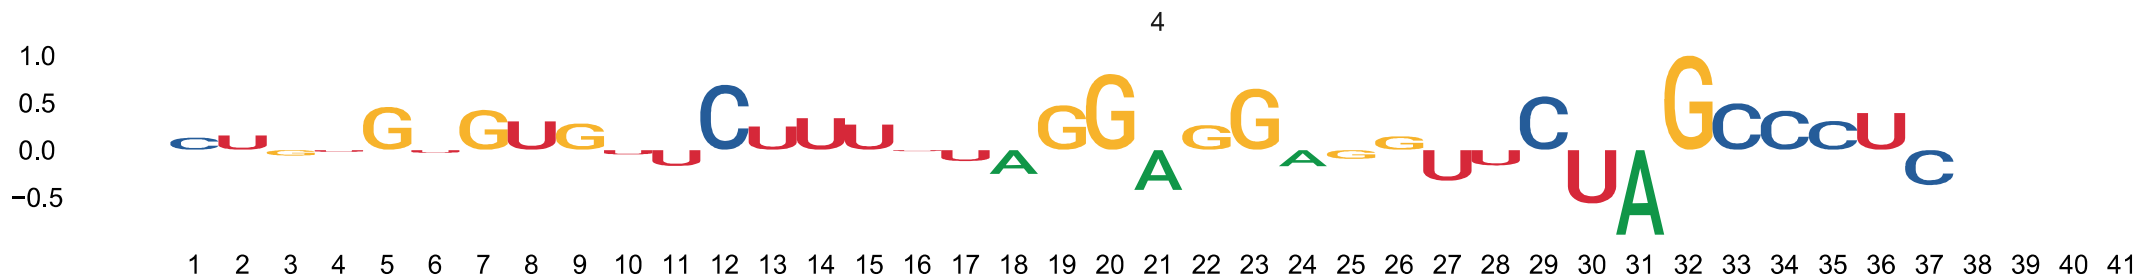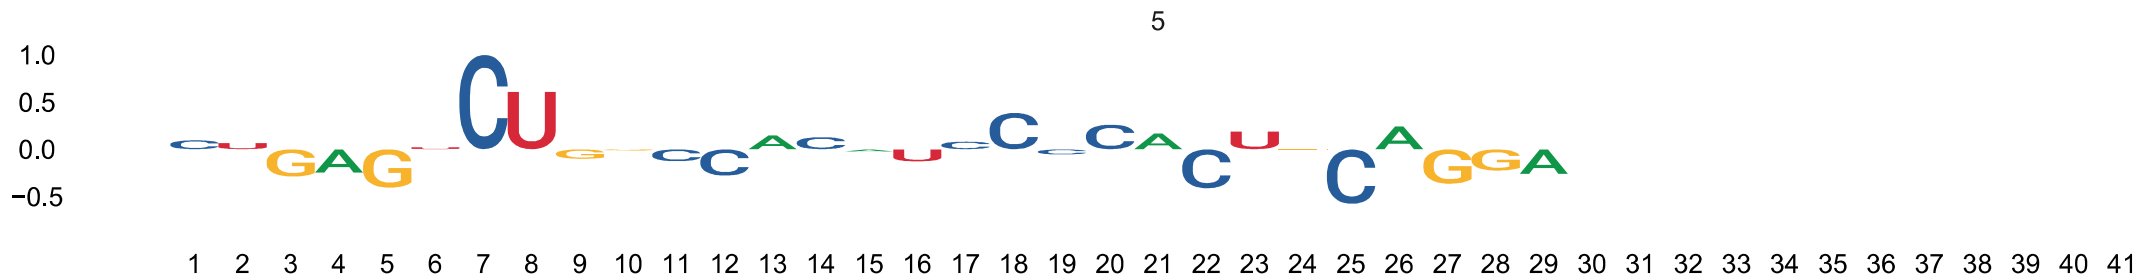

1

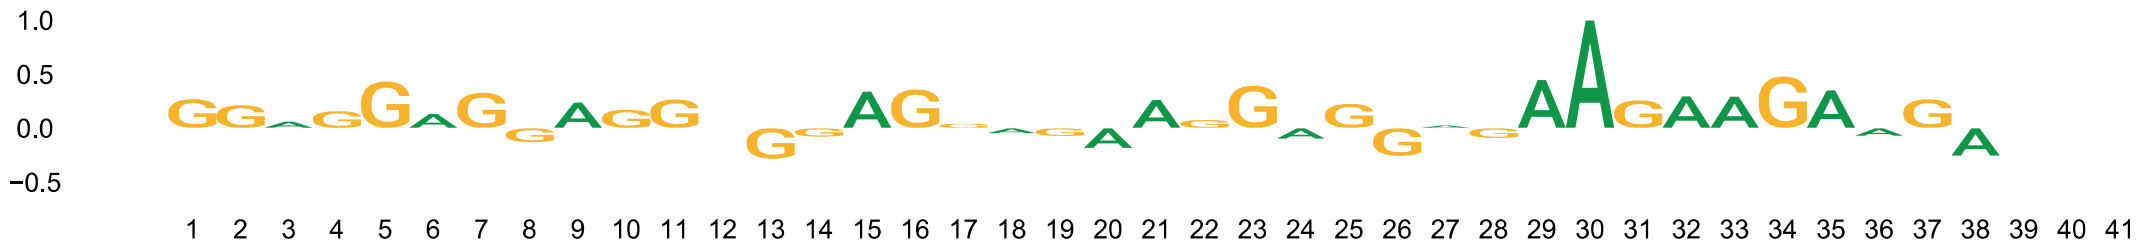

2

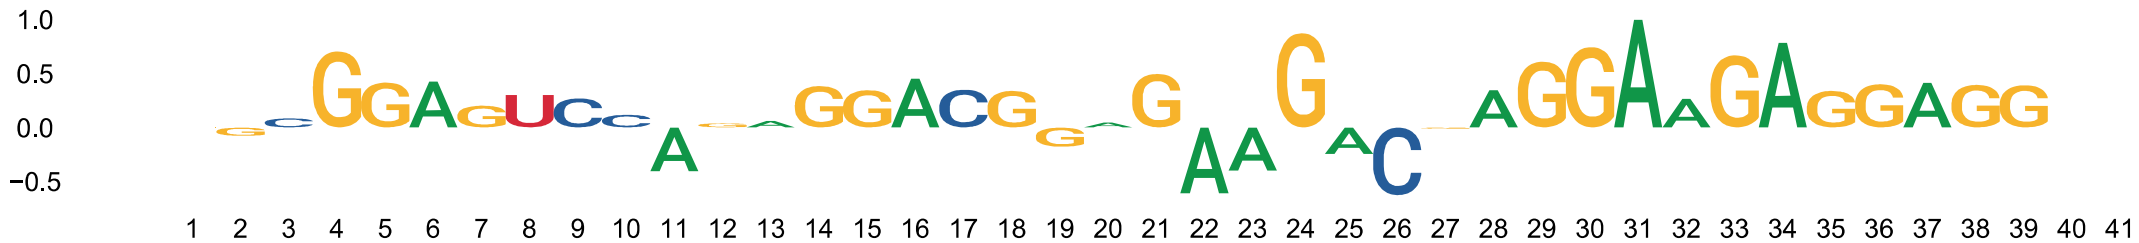

3

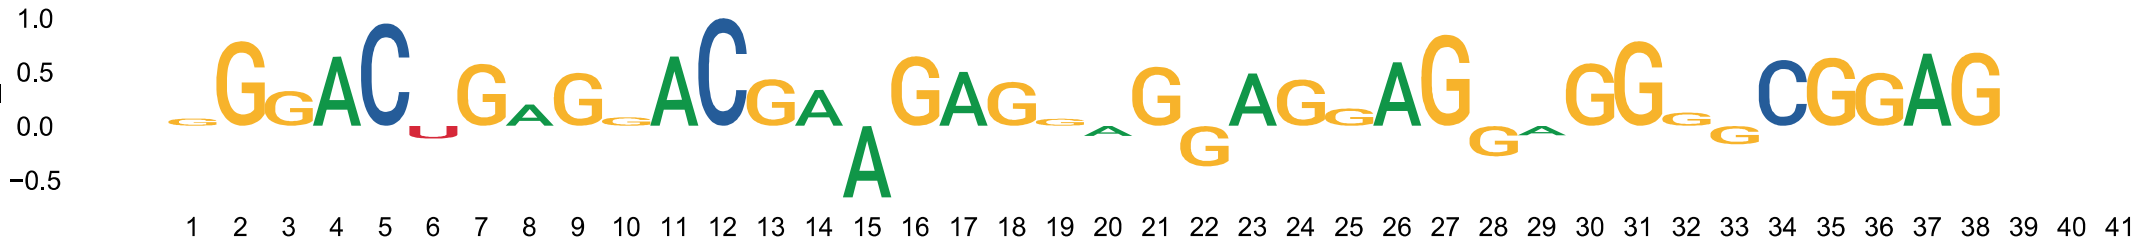

4

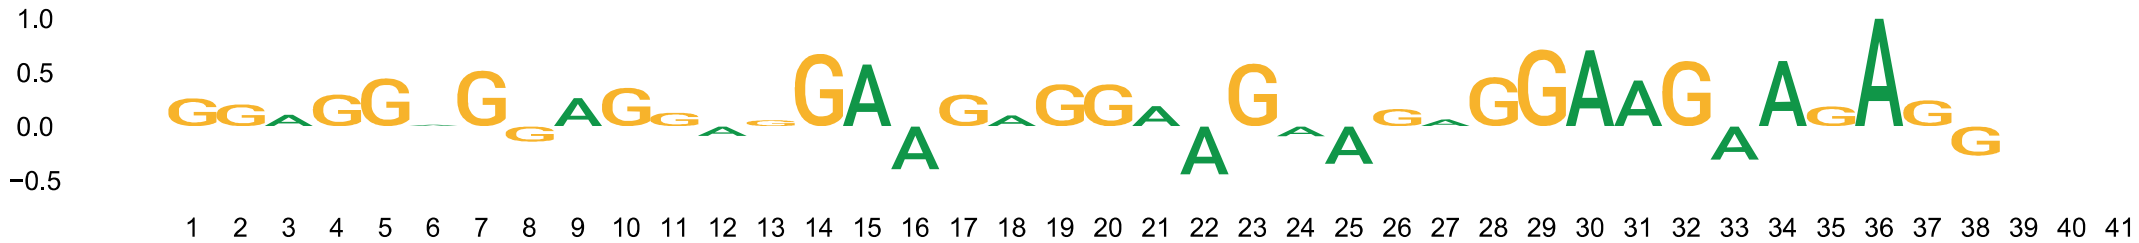

5

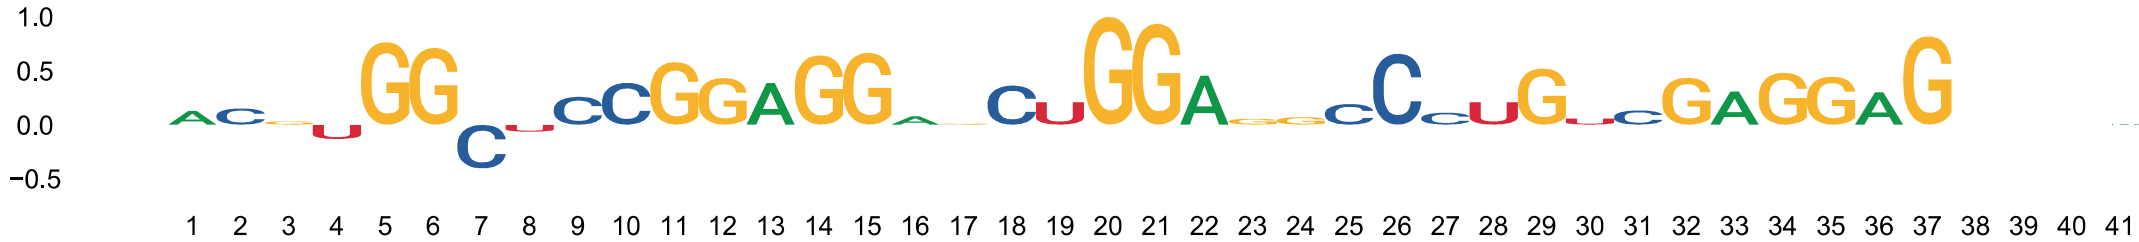

SRSF1\_K562



1

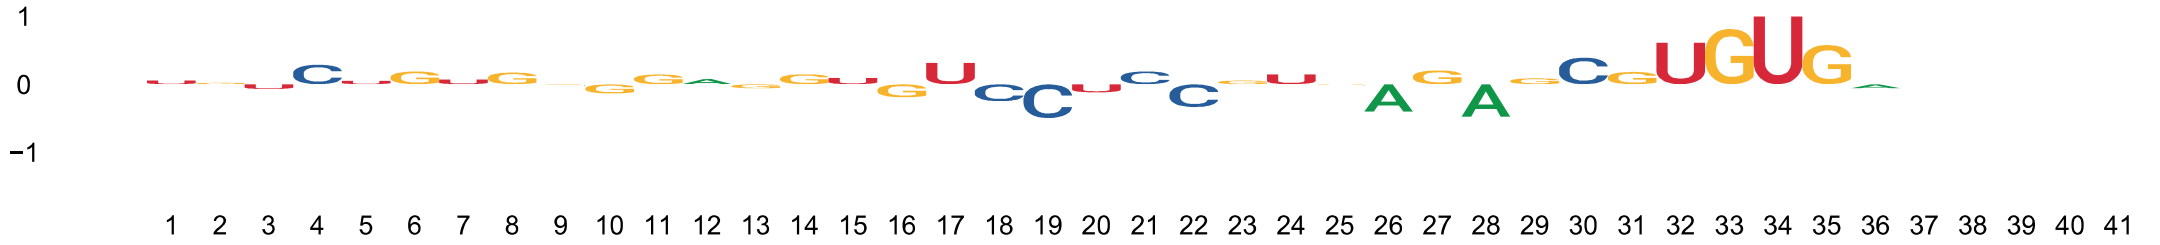

2

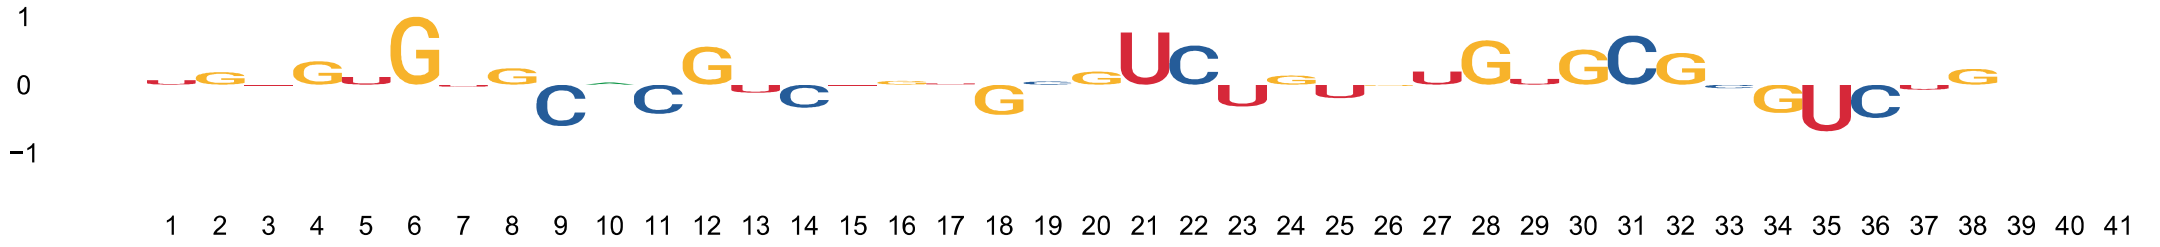

3

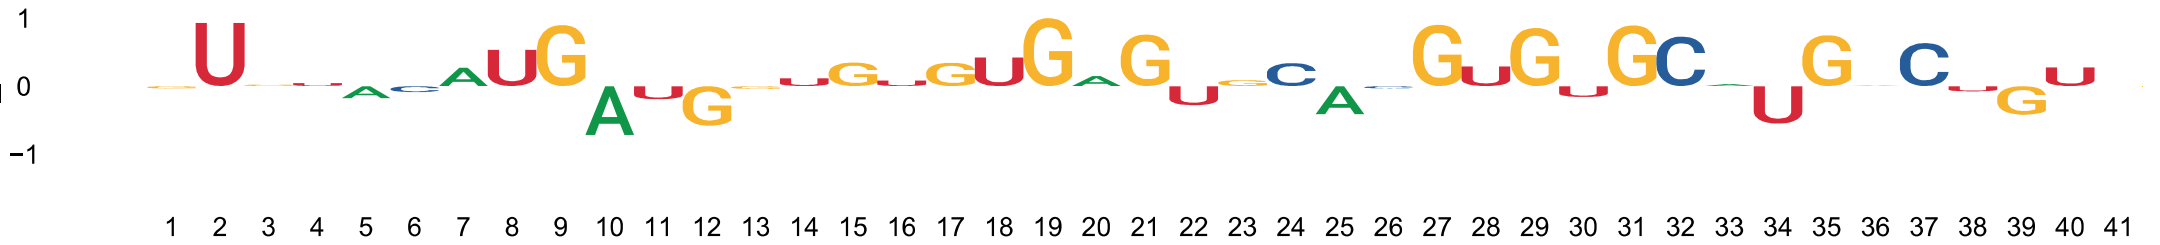

4

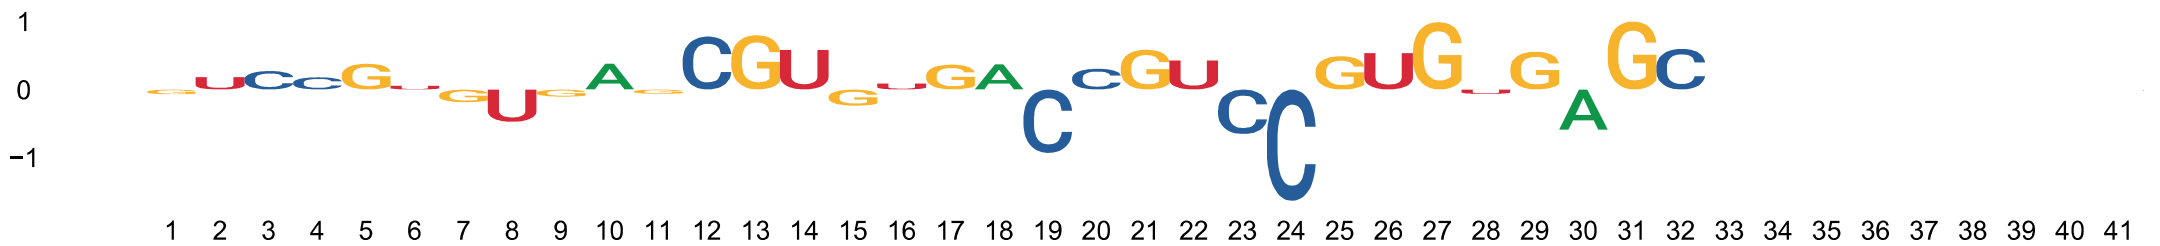

5

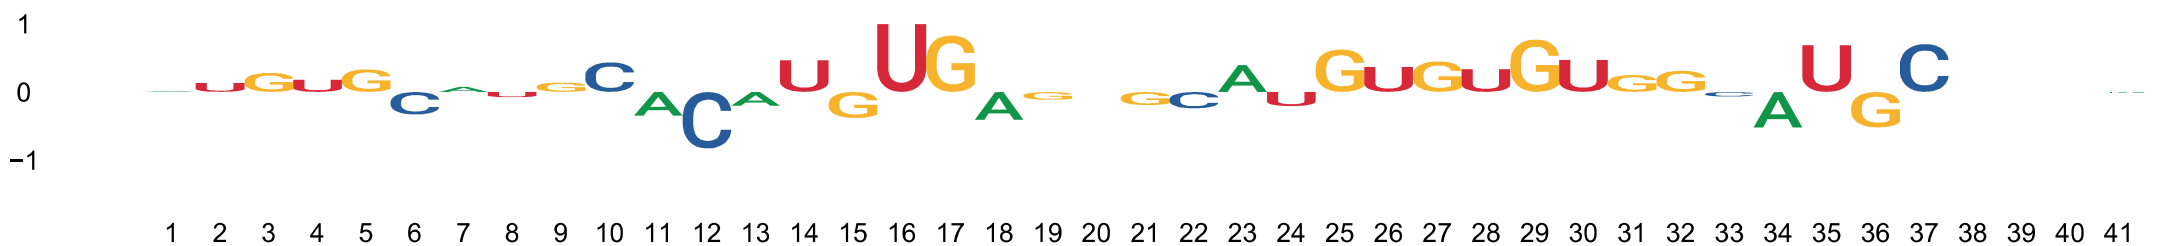

SRSF7\_K562



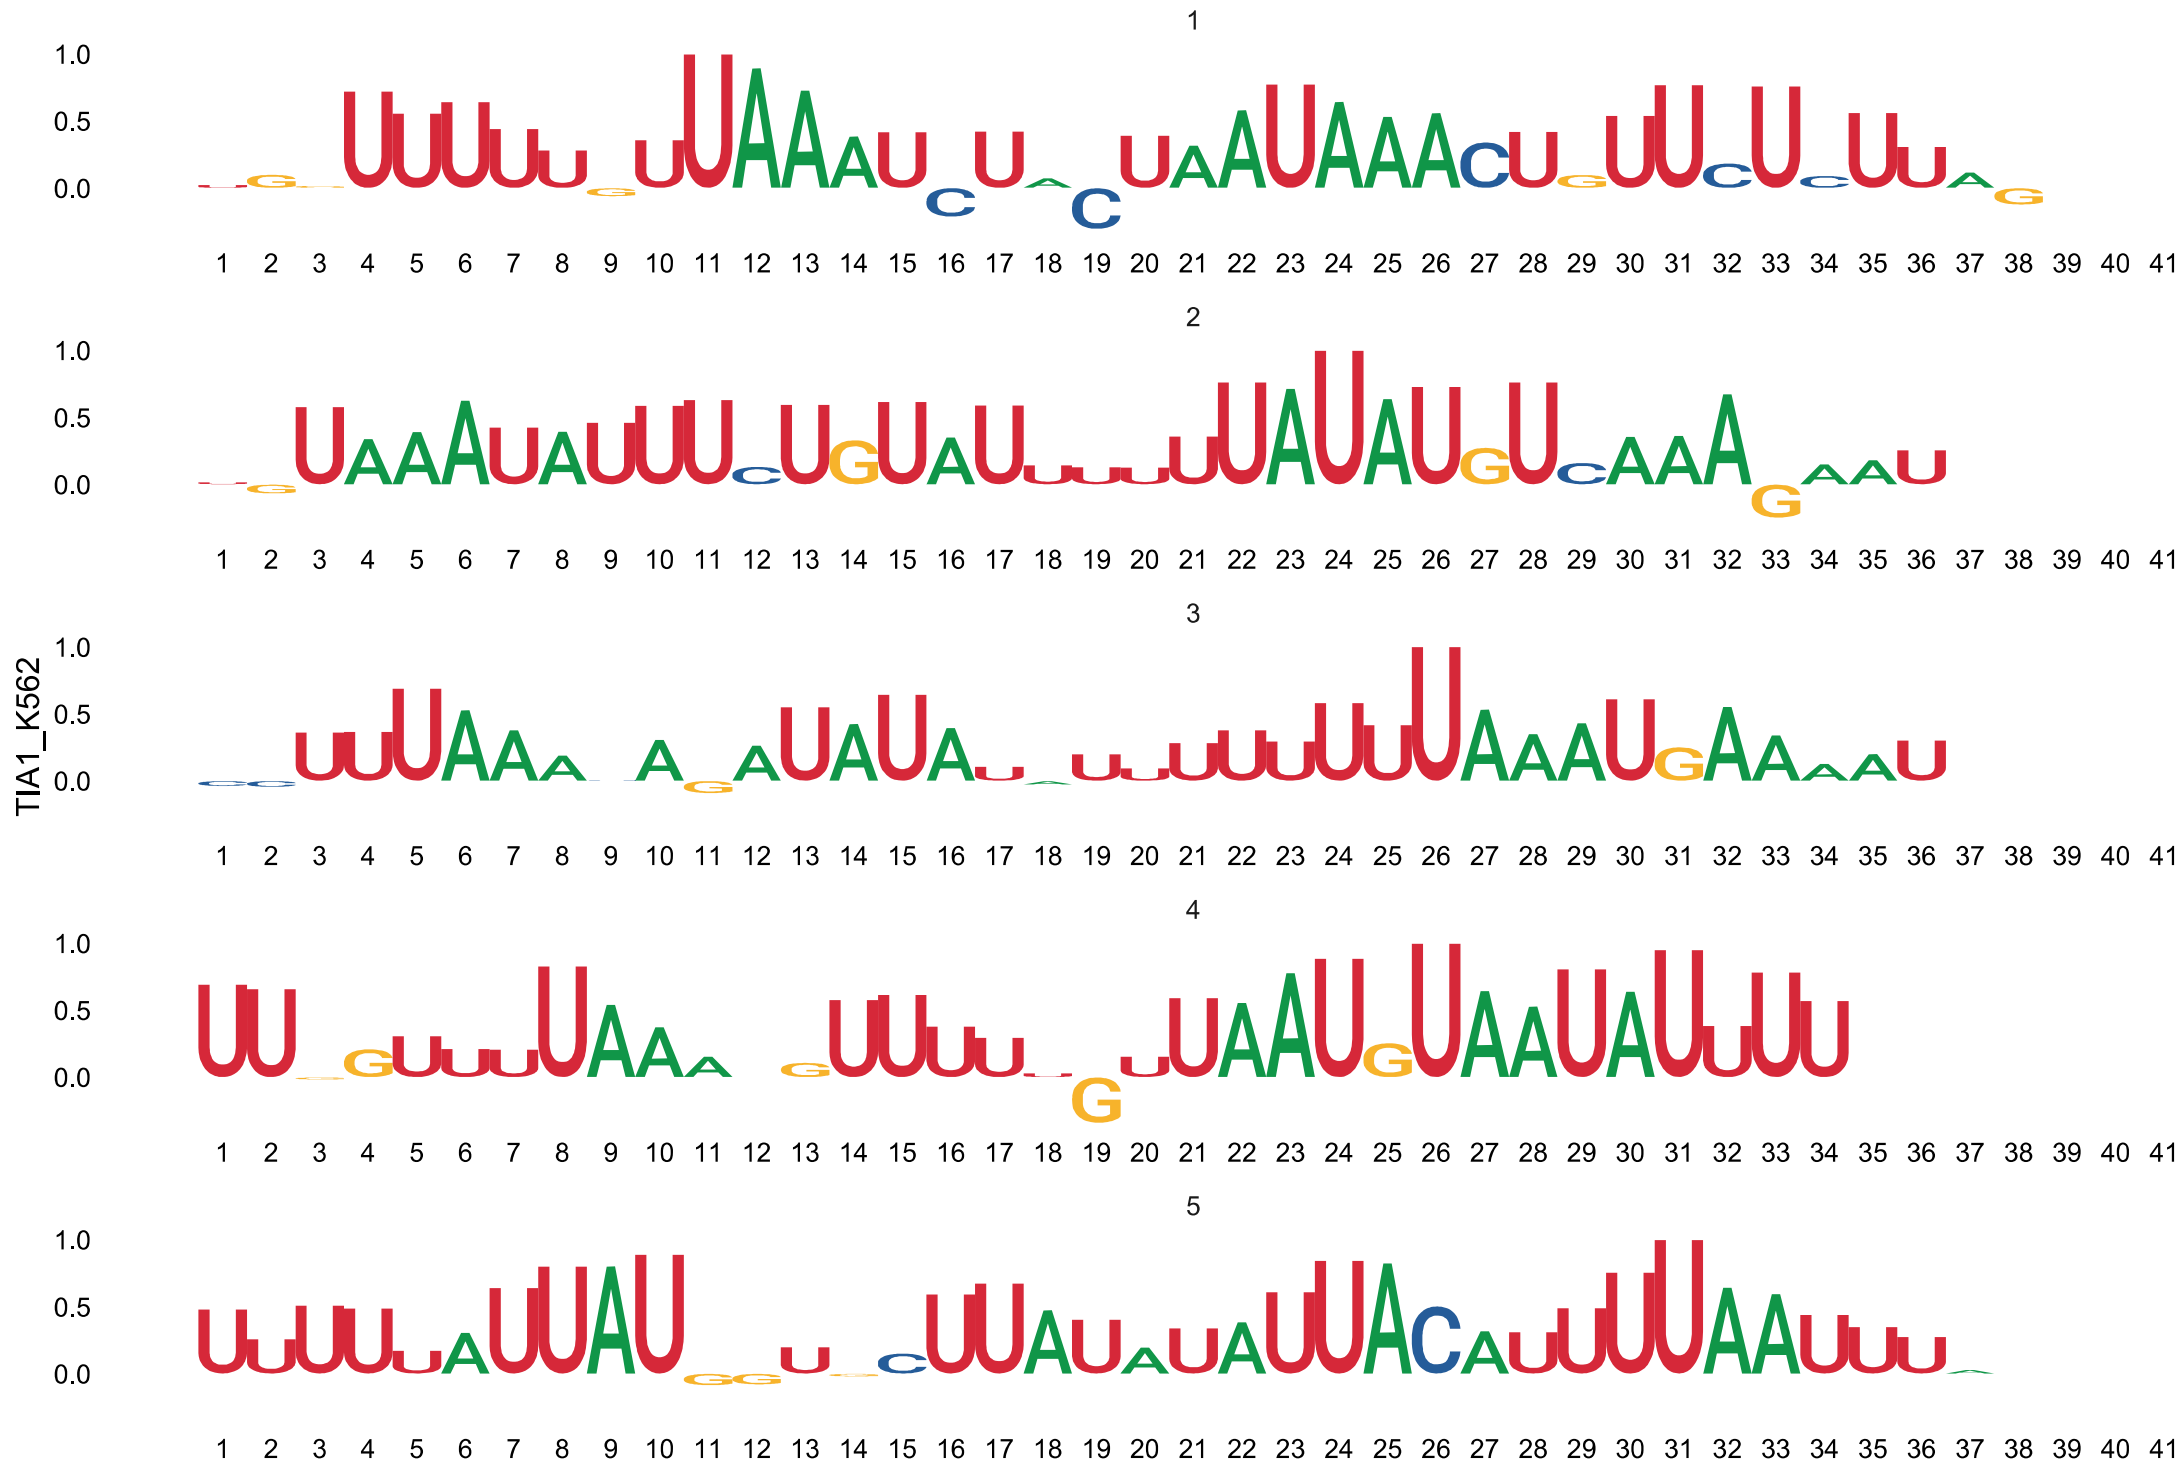

1

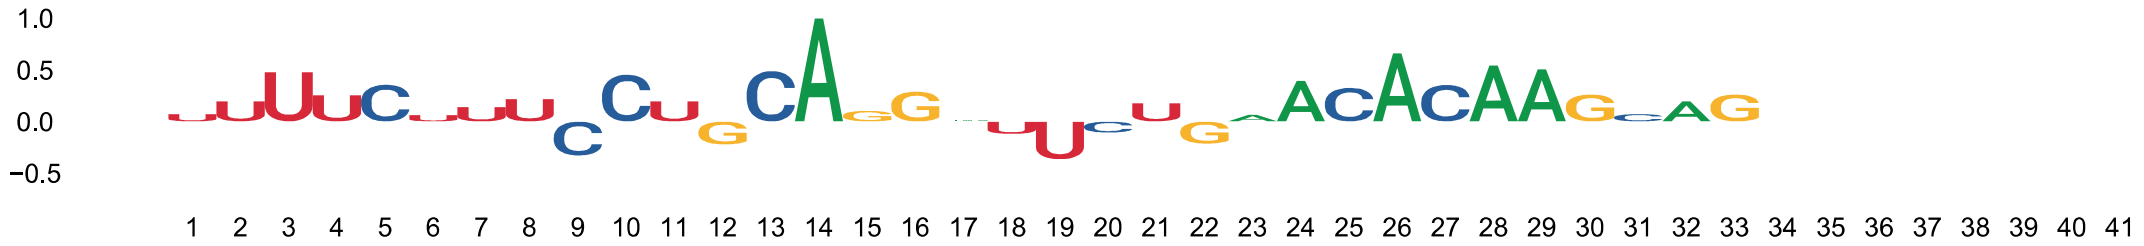

2

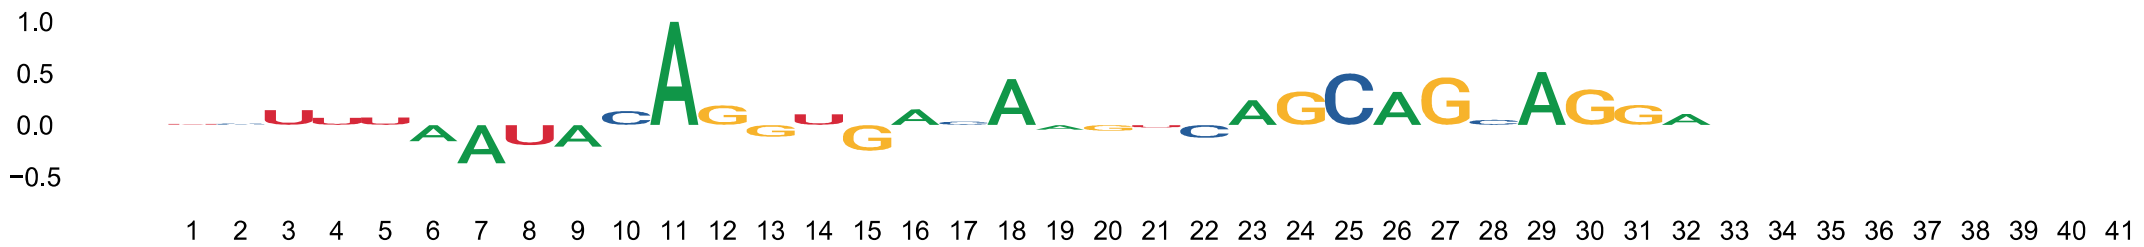

3

U2AF2\_K562

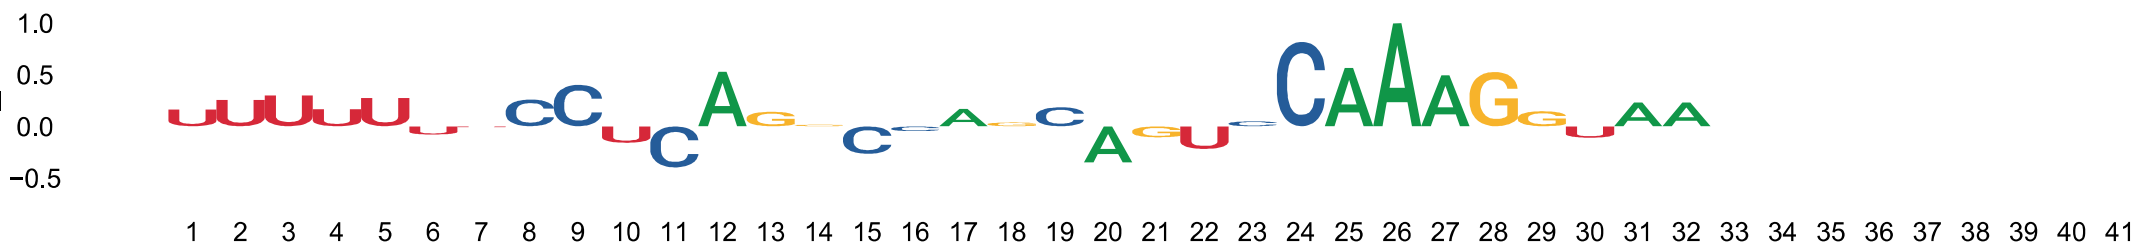

4

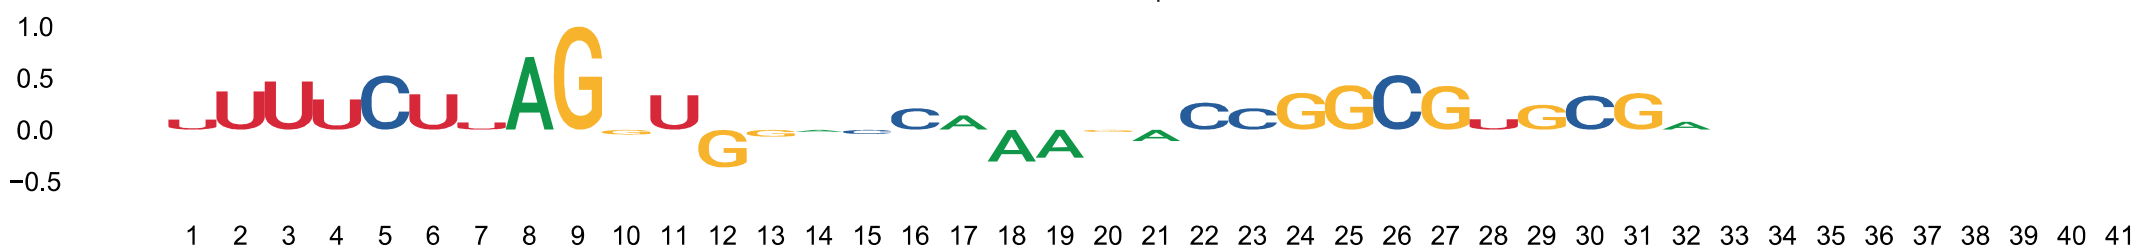

5

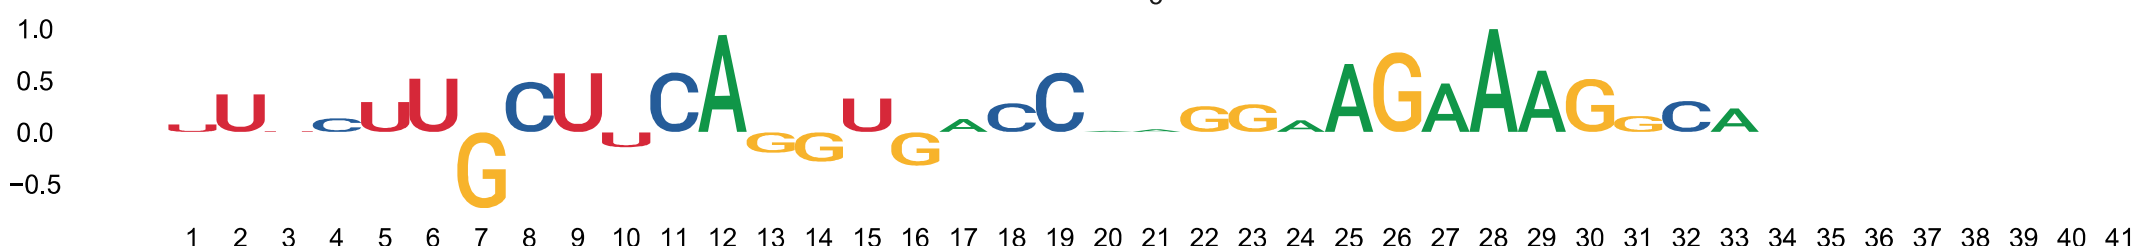

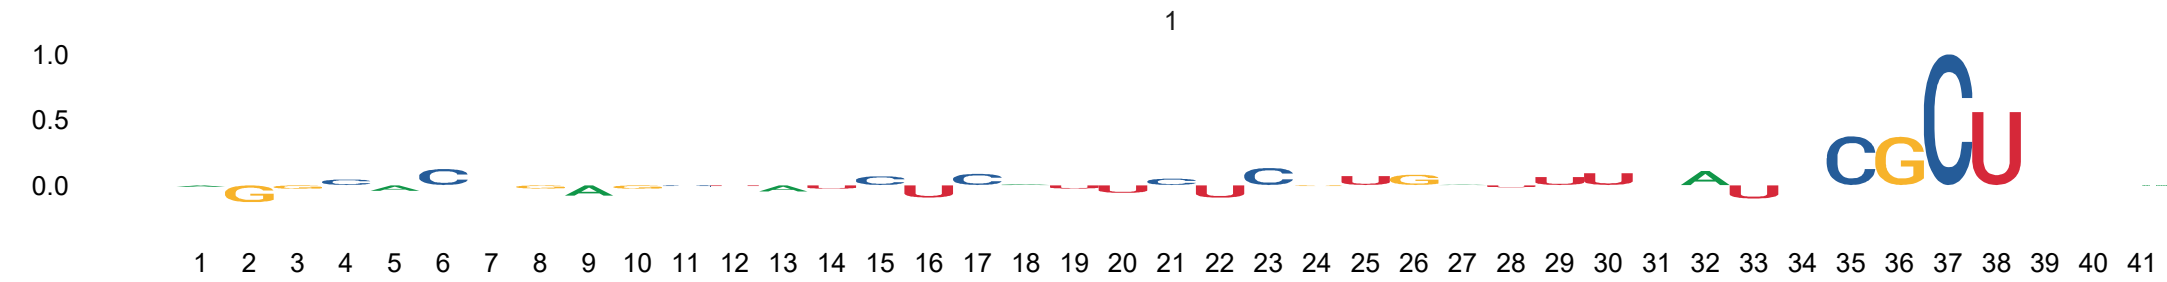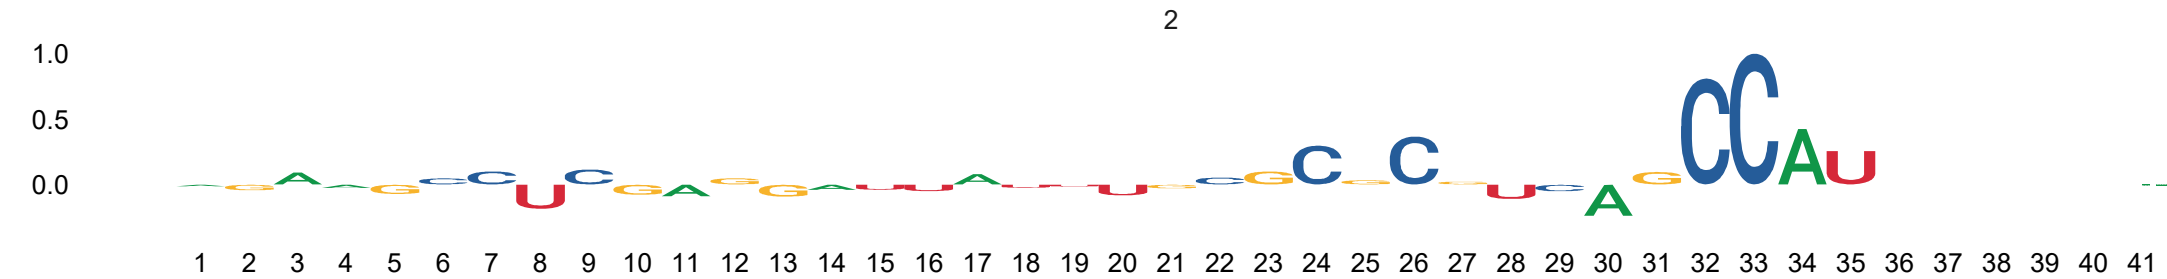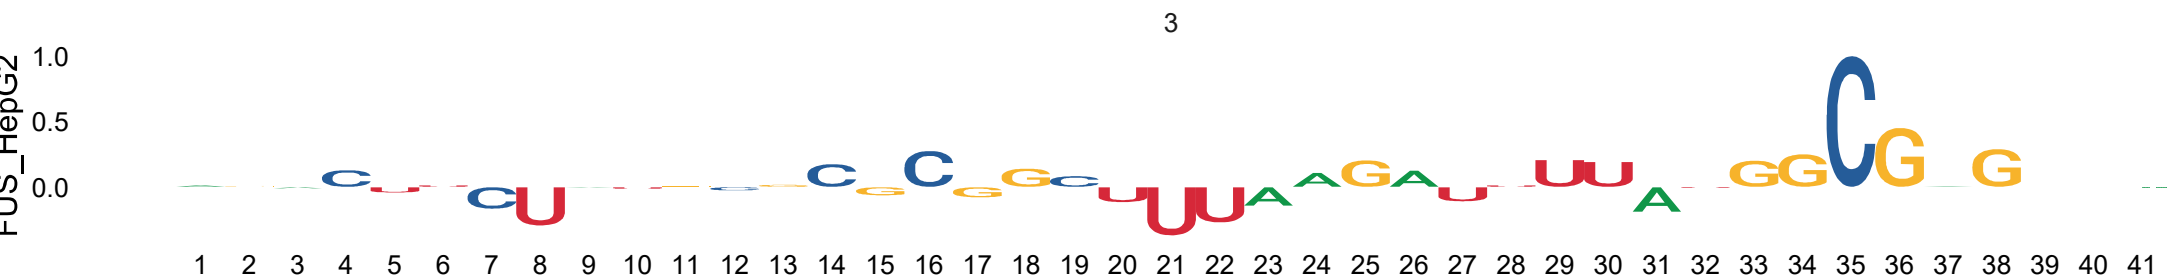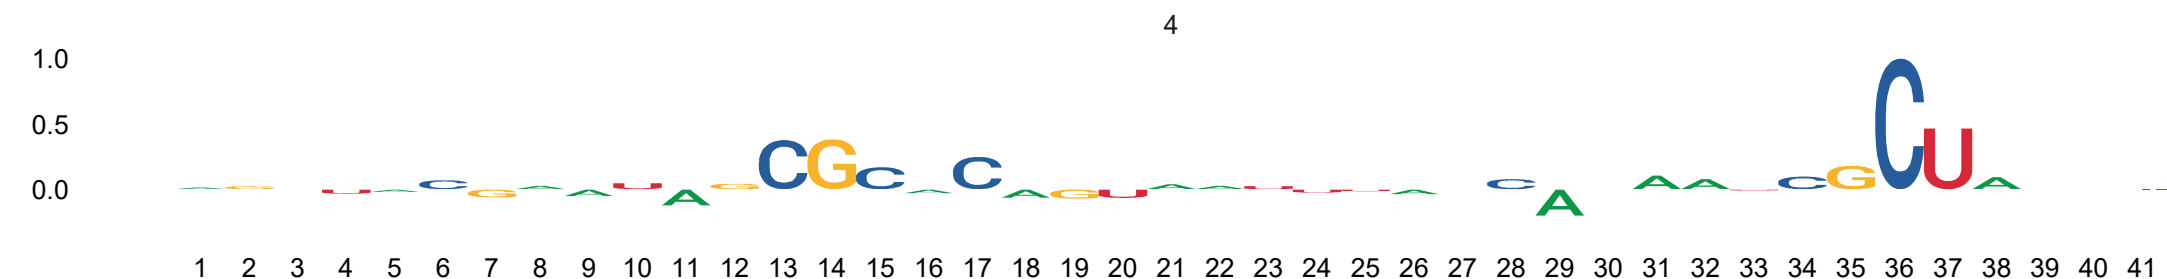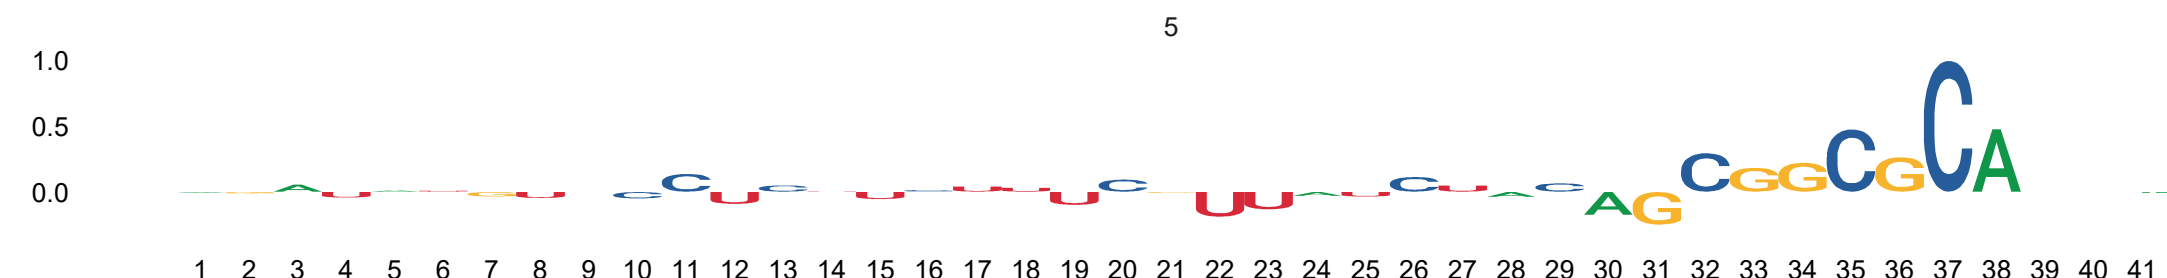

FUS\_HepG2

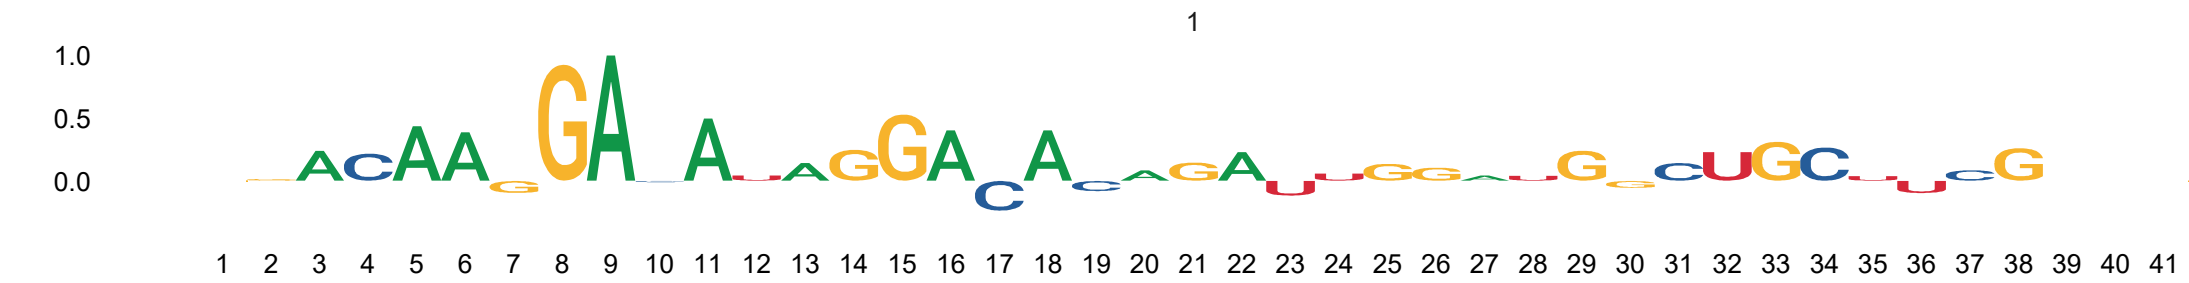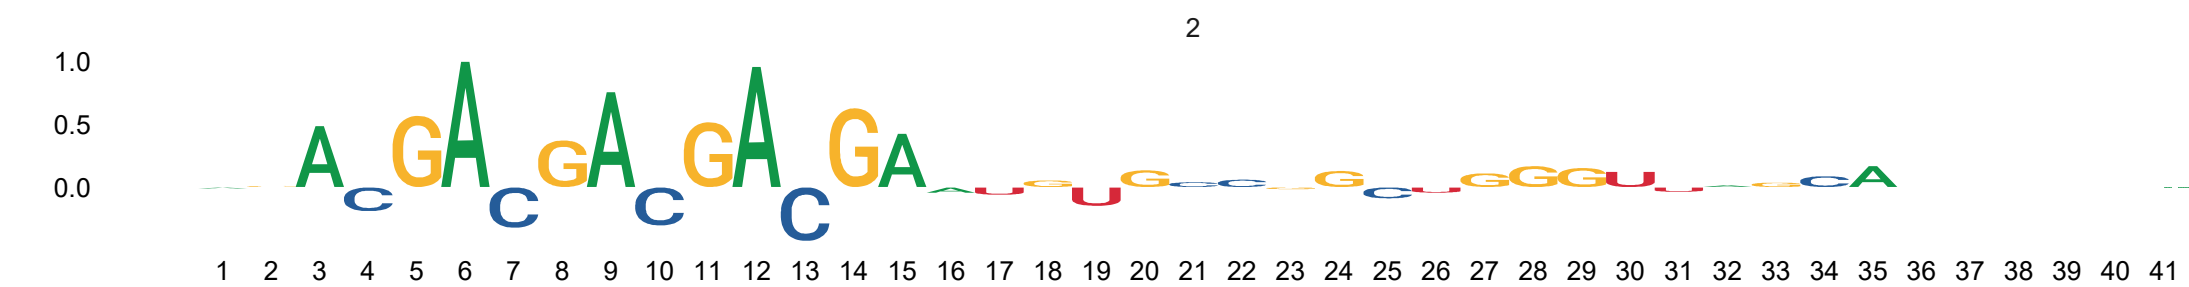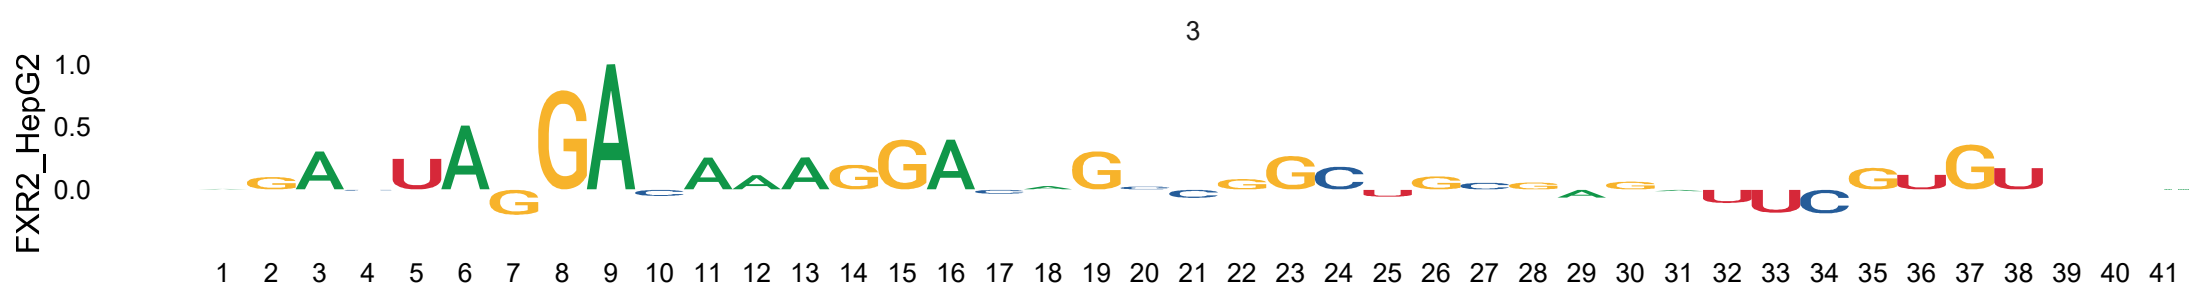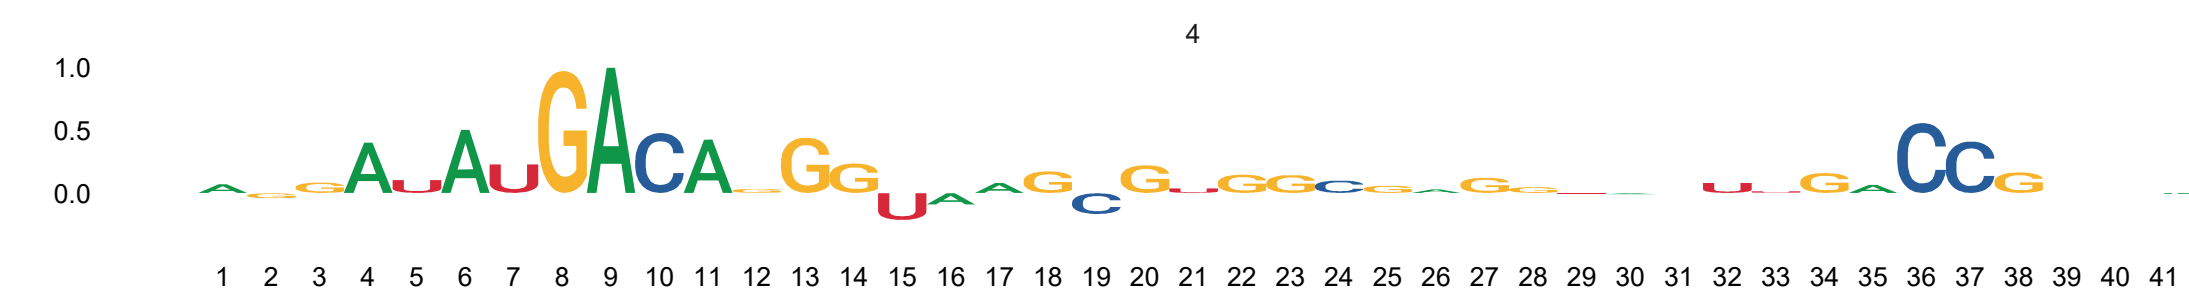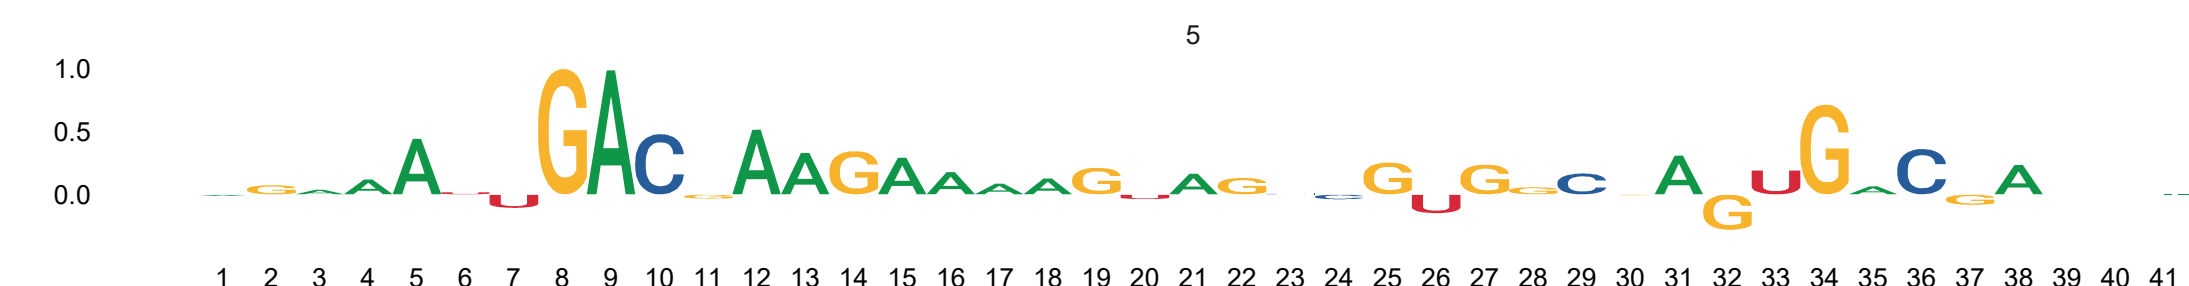



1

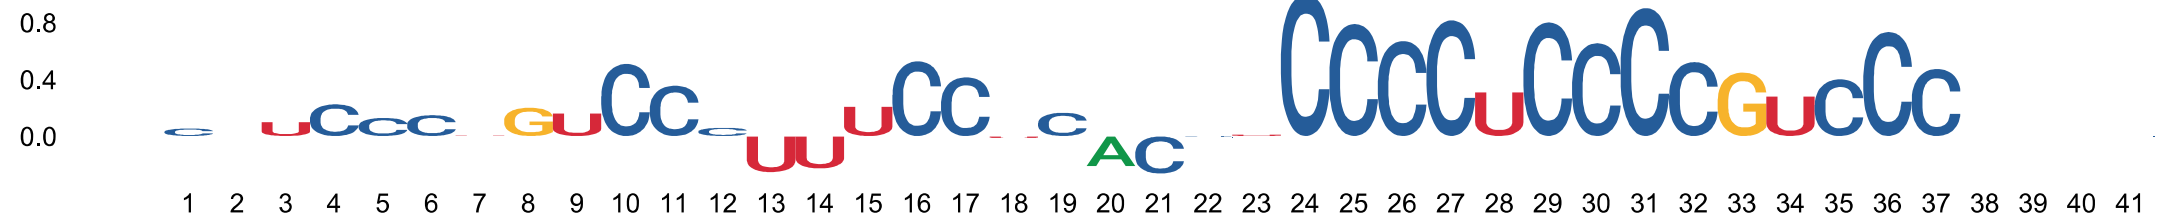

2

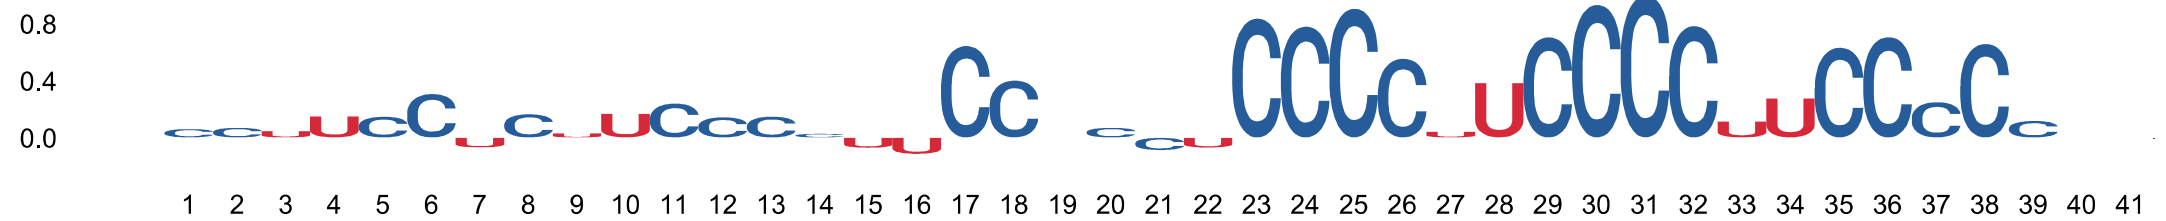

3

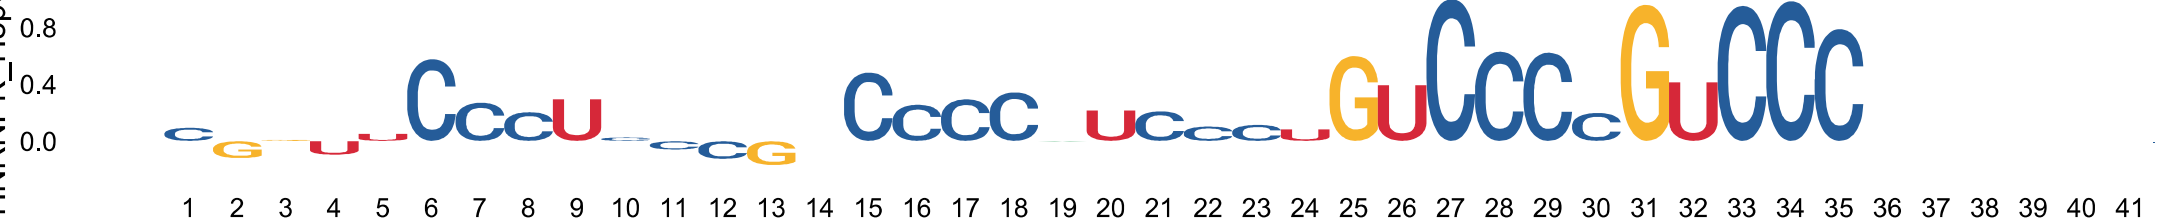

4

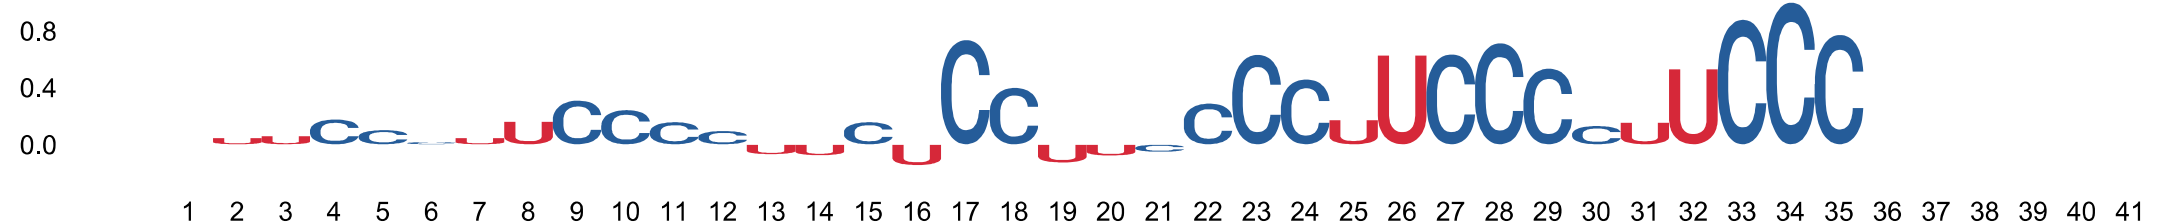

5

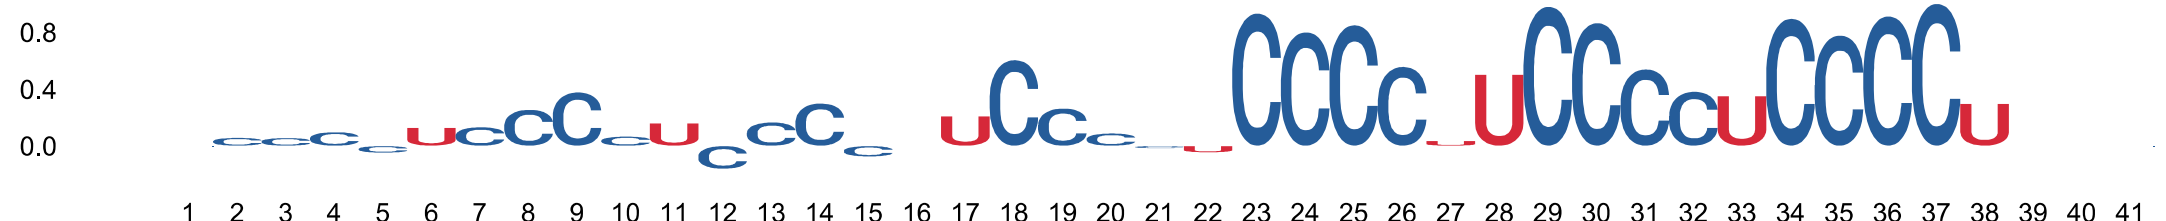

HNRNPk\_HepG2



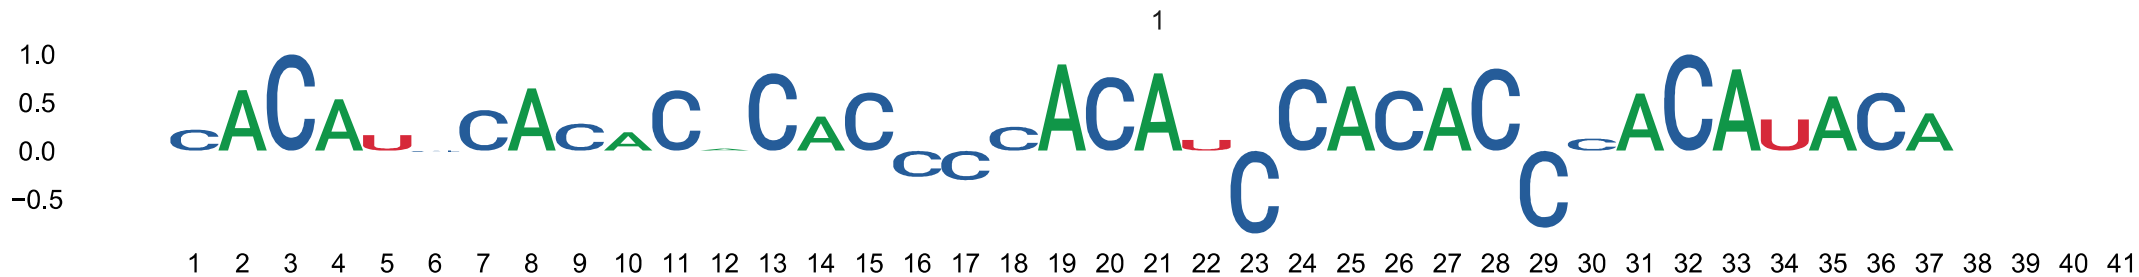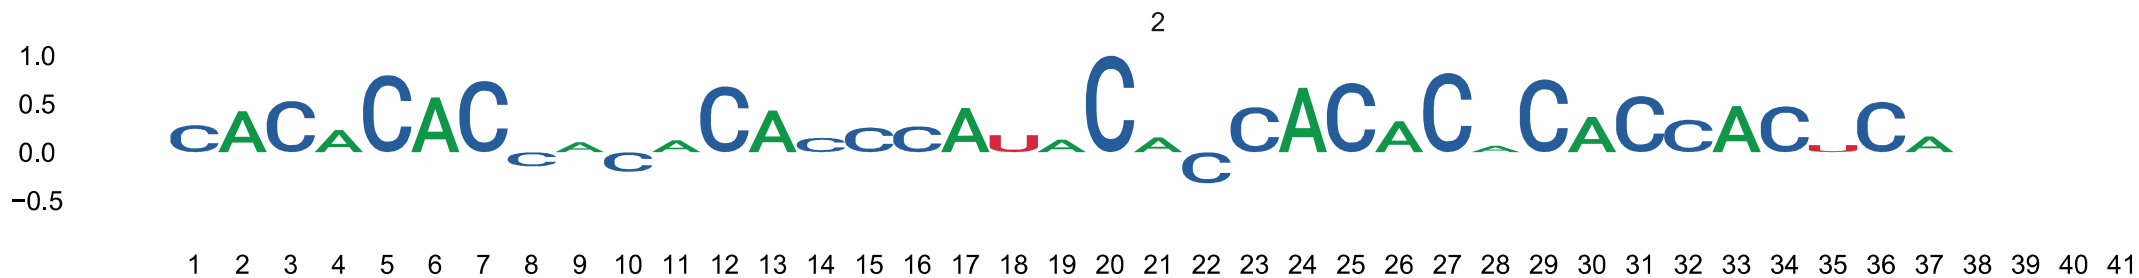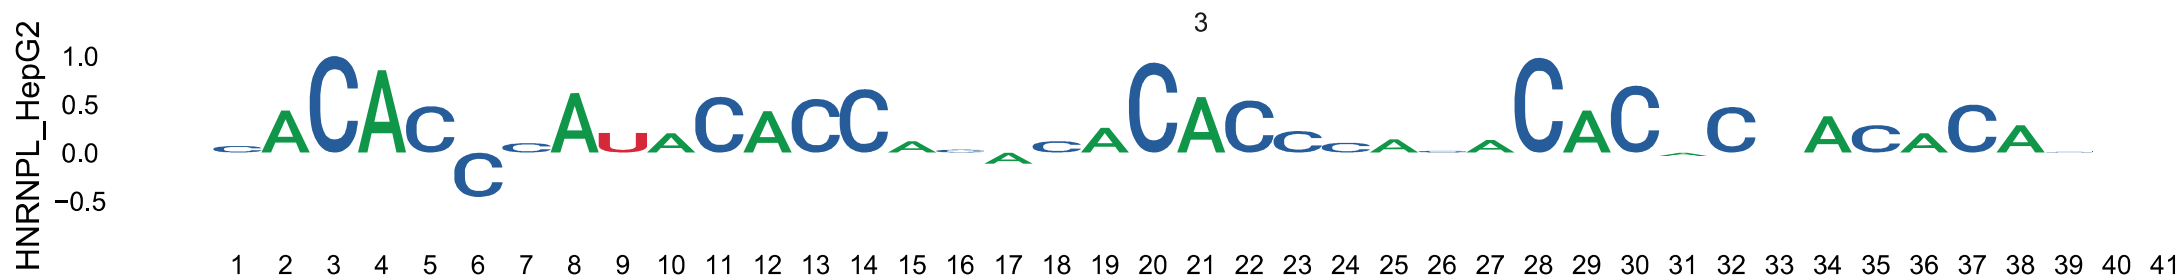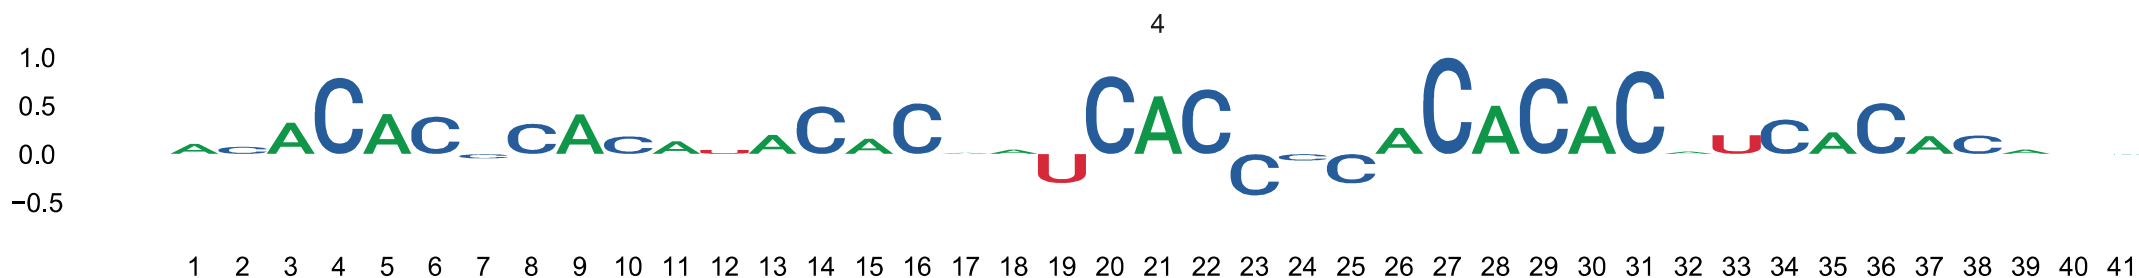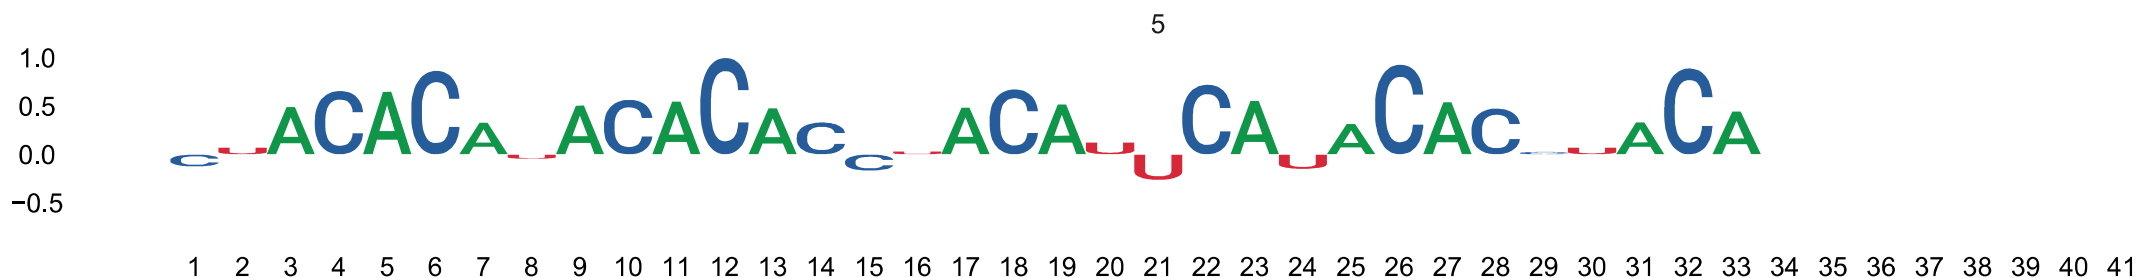

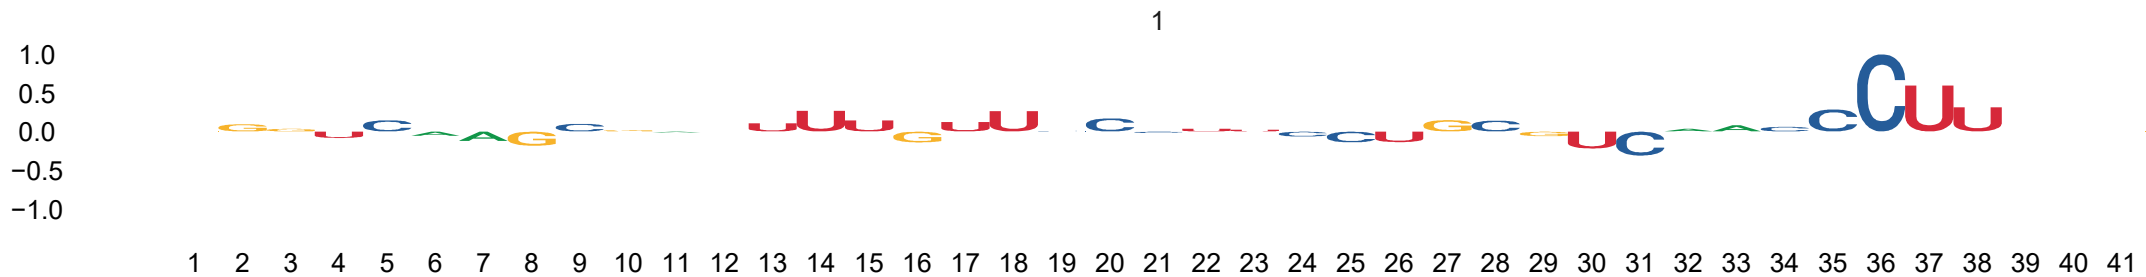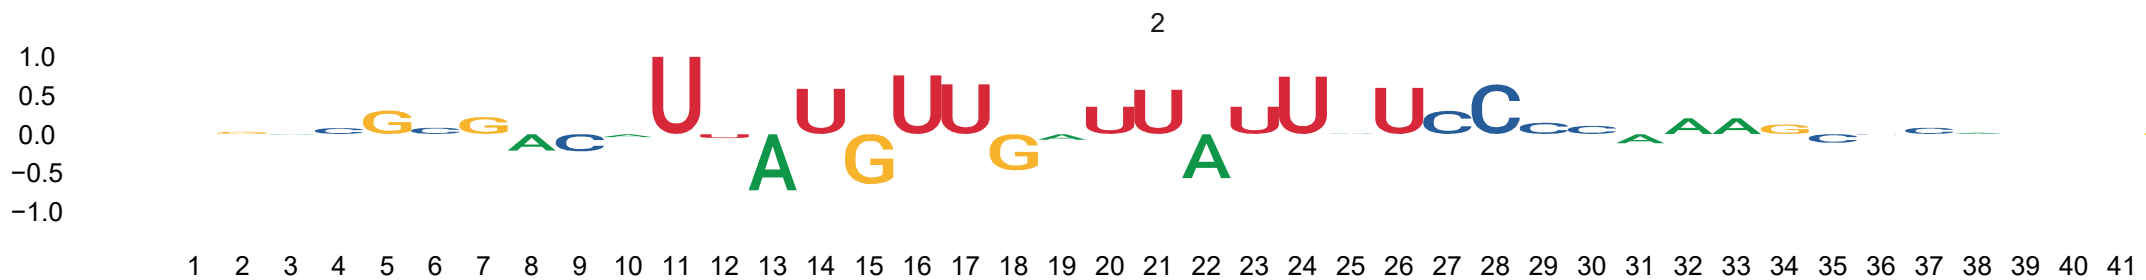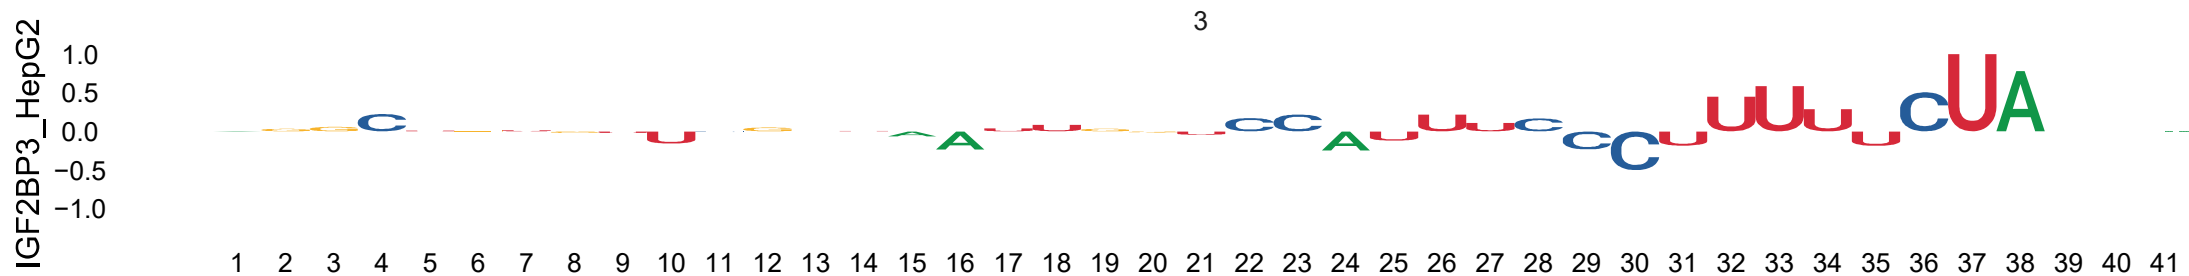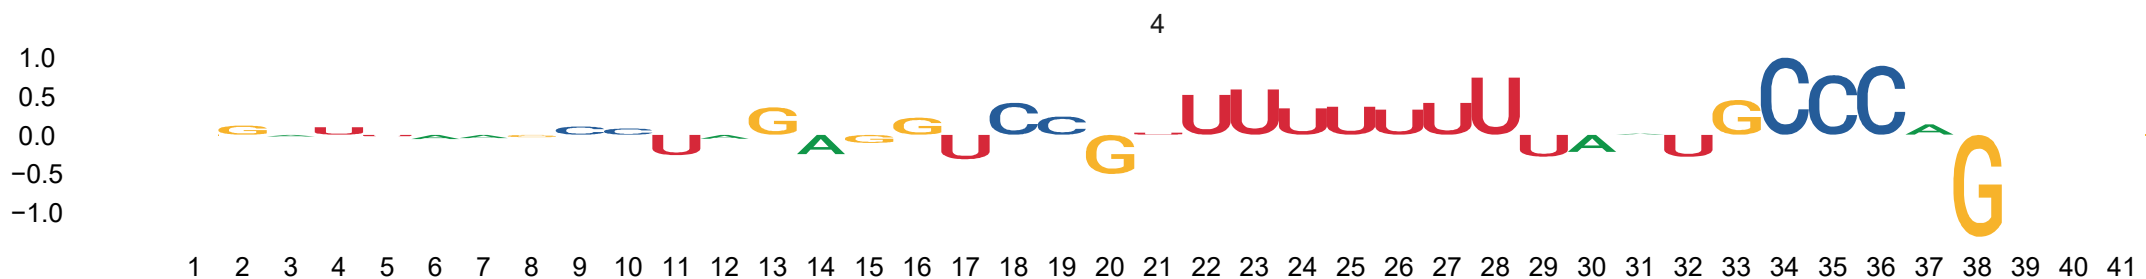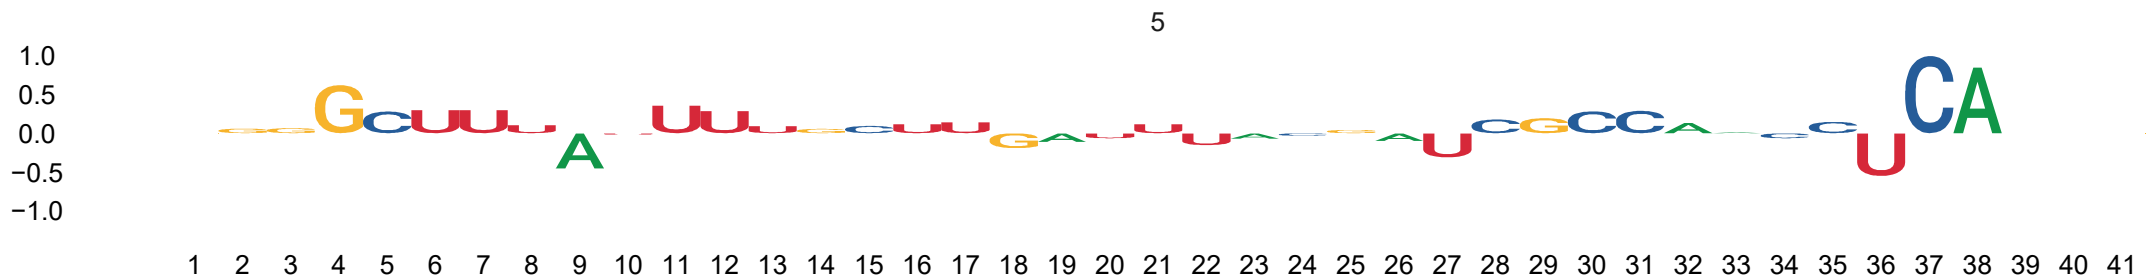

MATR3\_HepG2

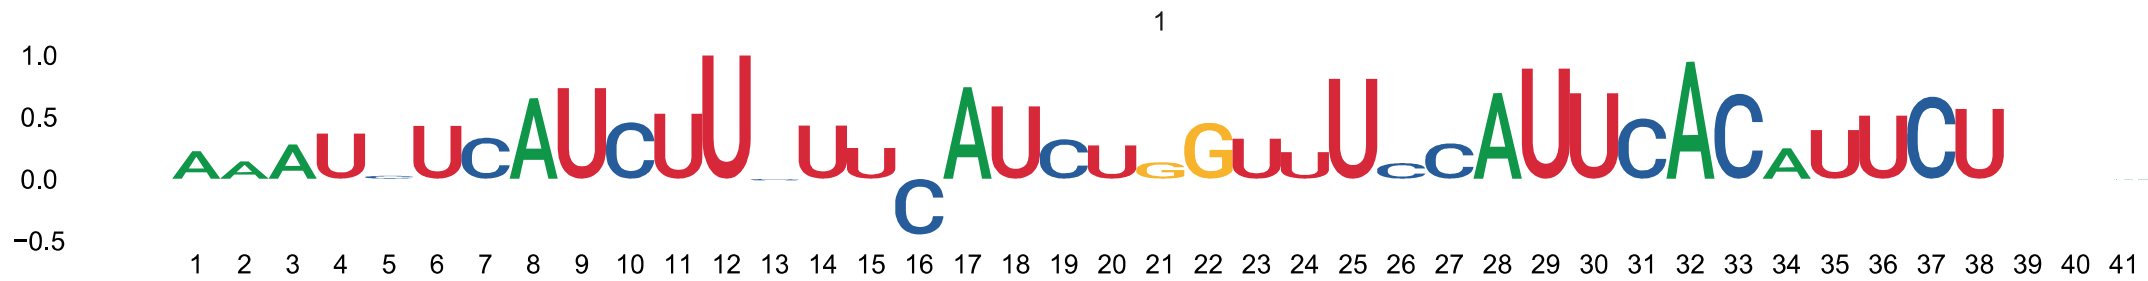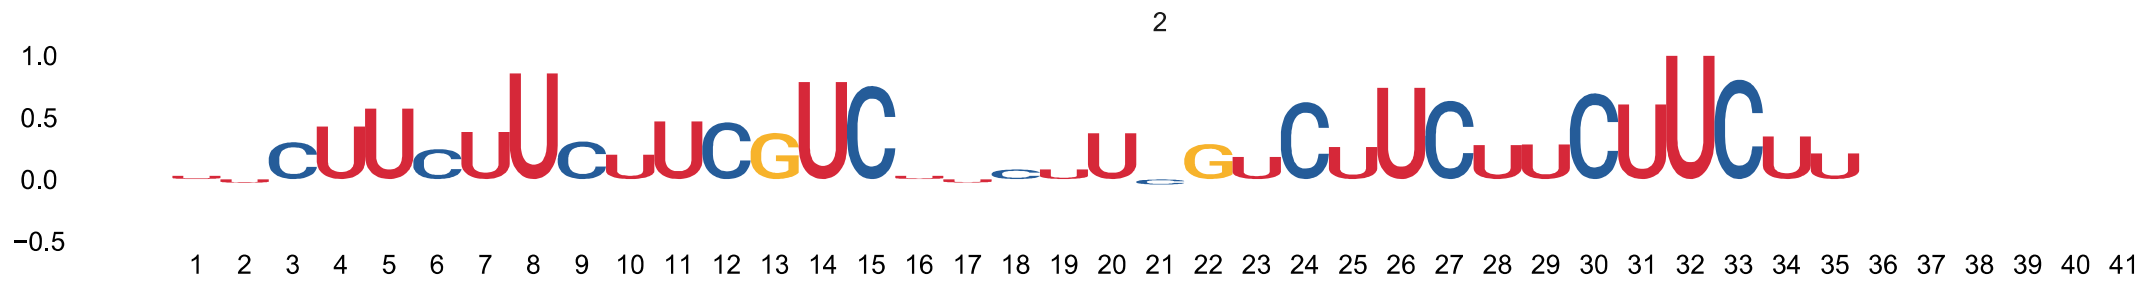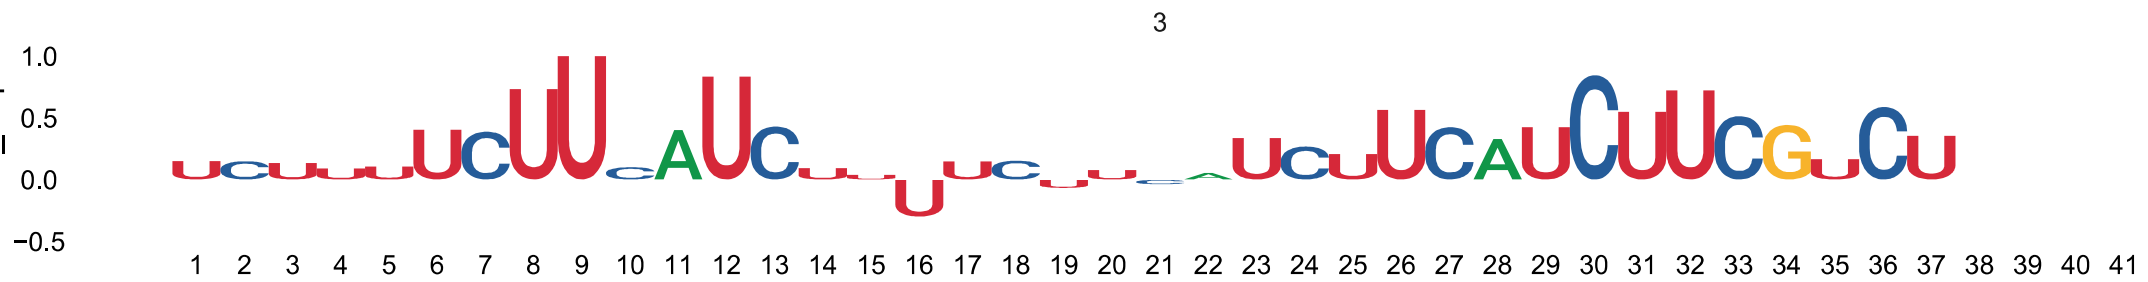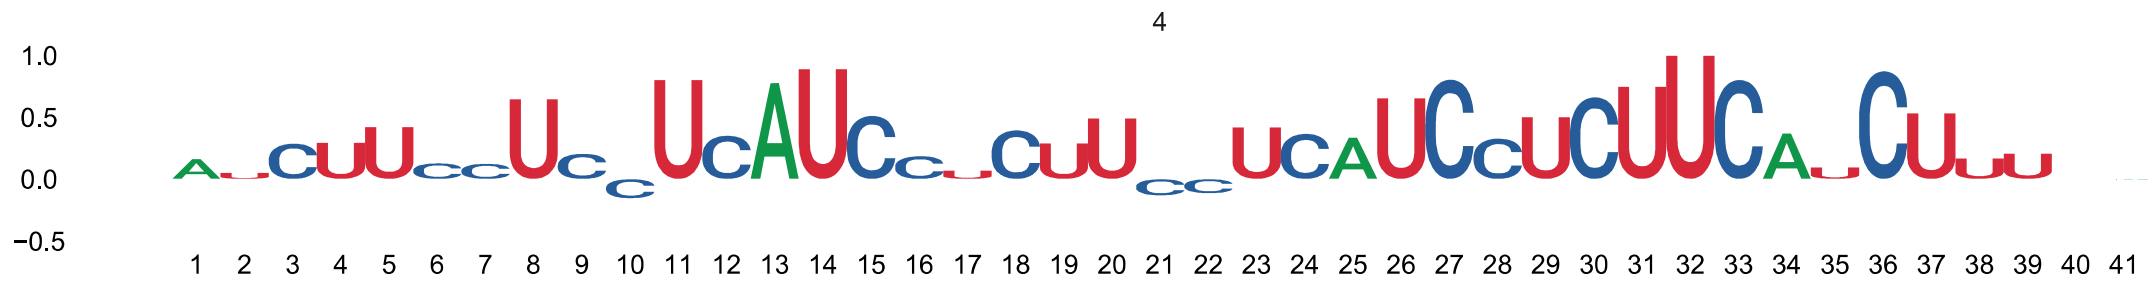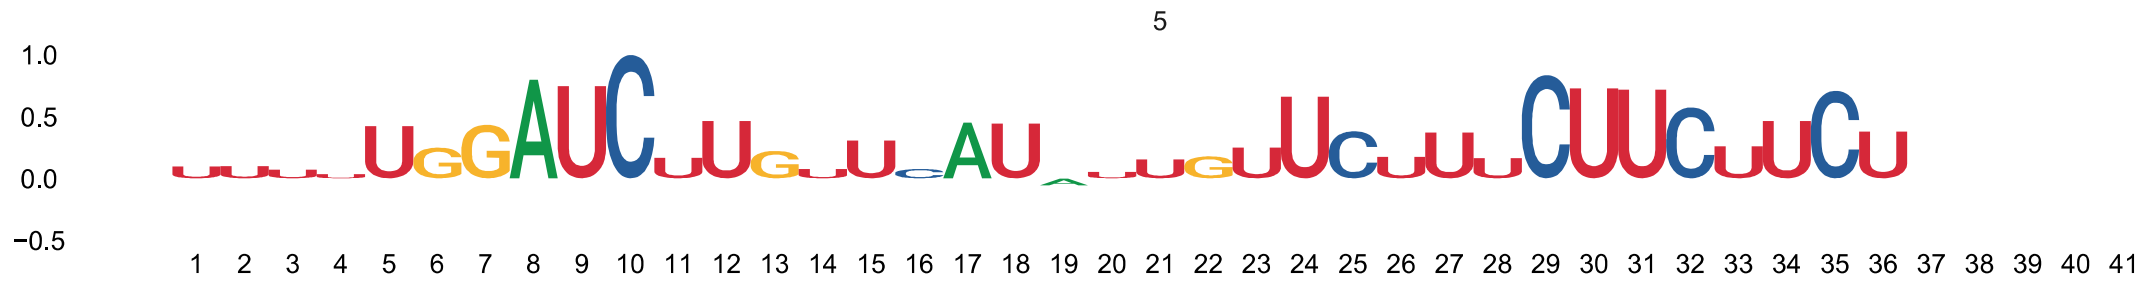

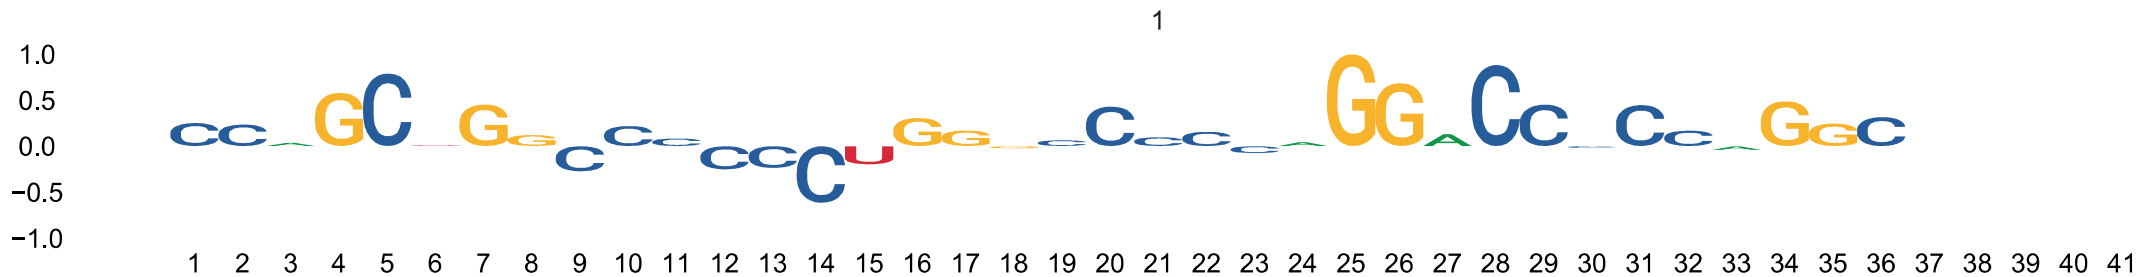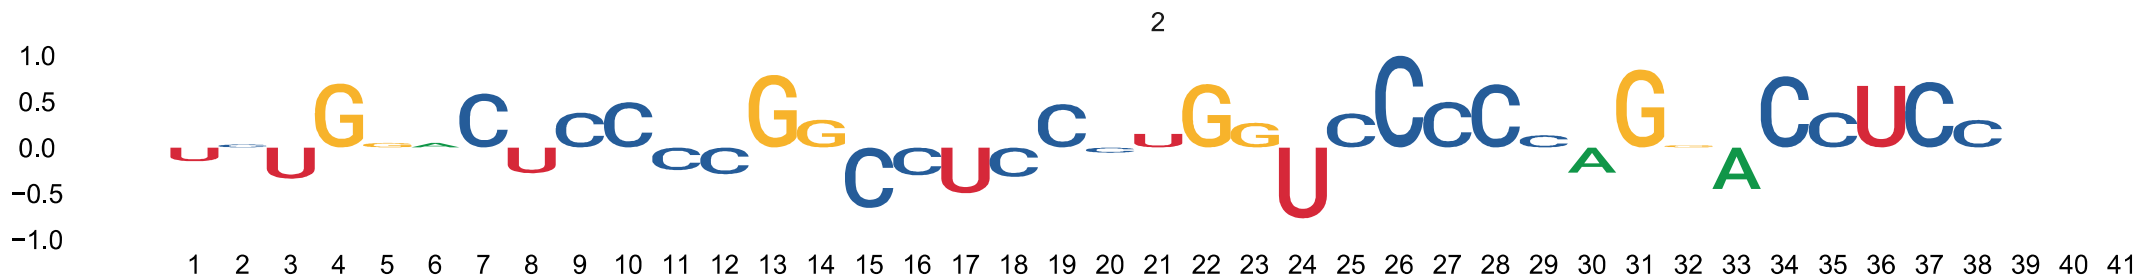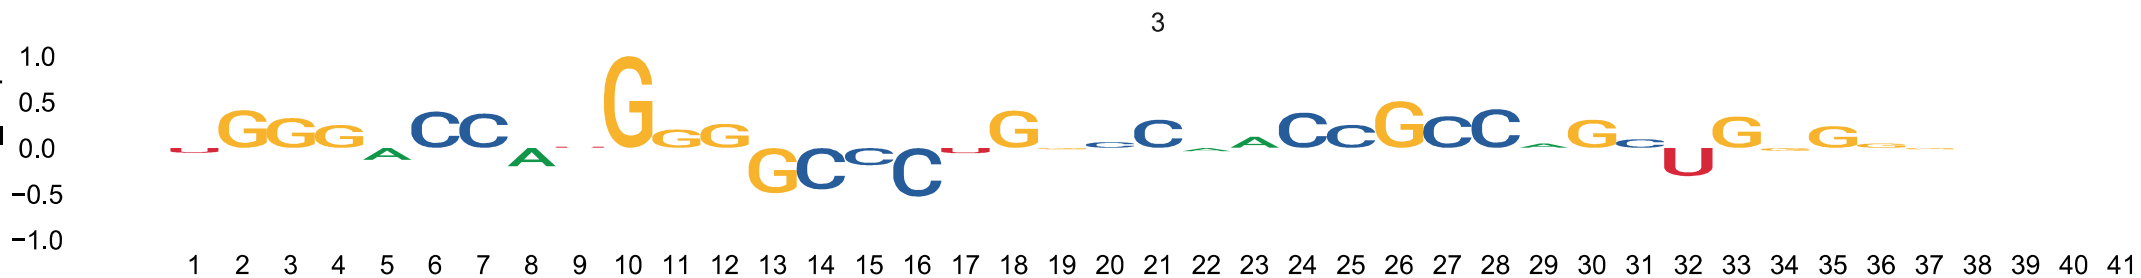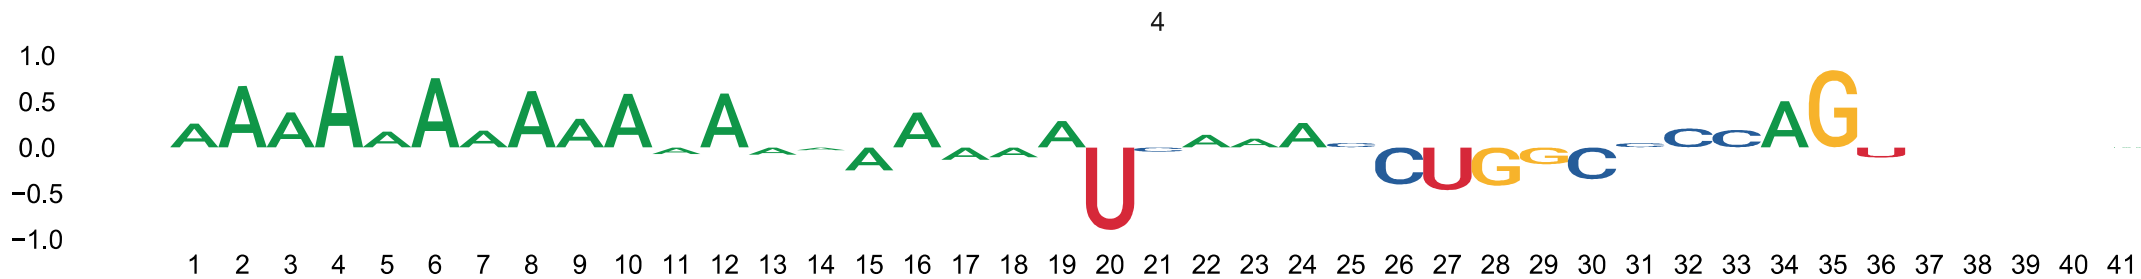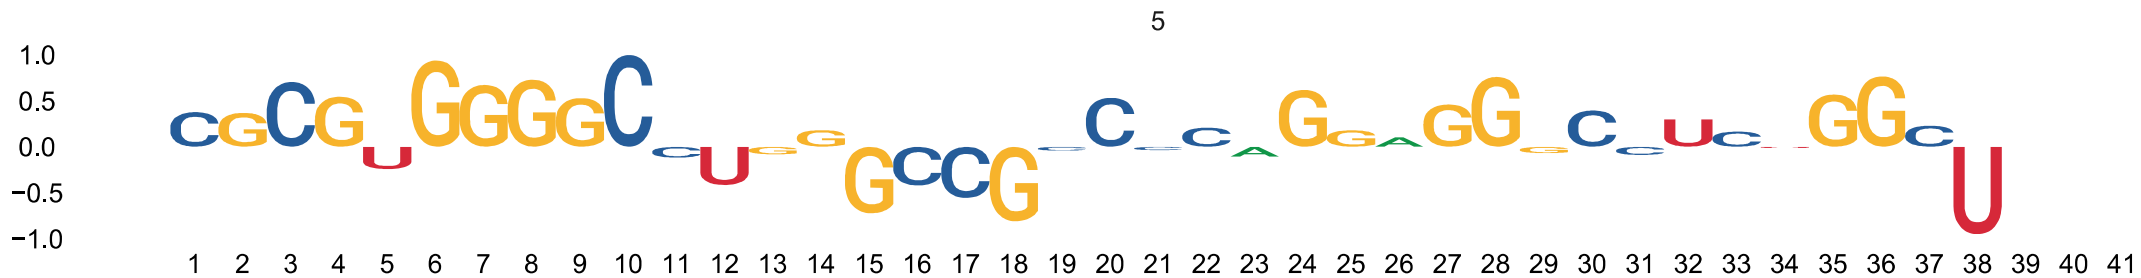

PABPN1\_HepG2

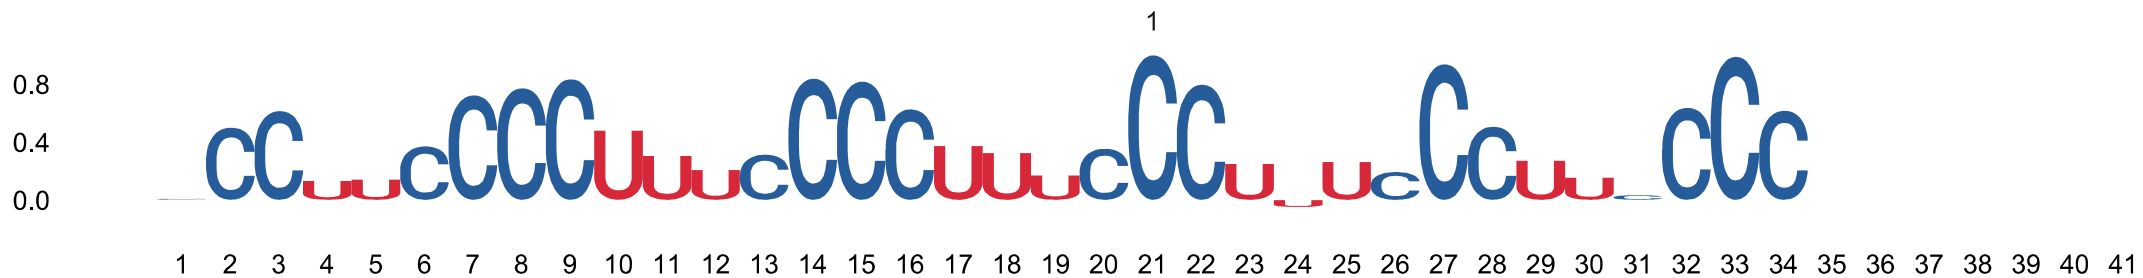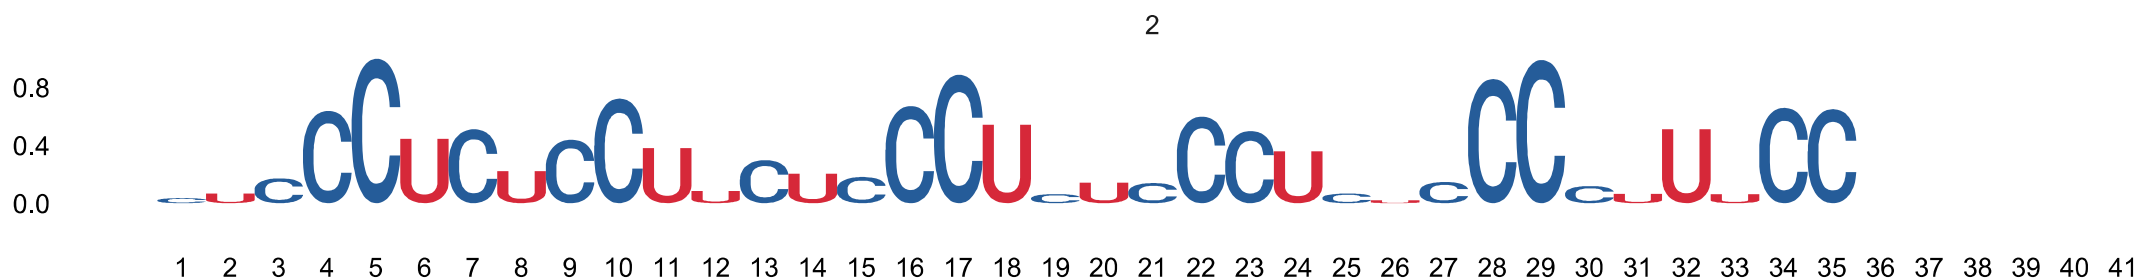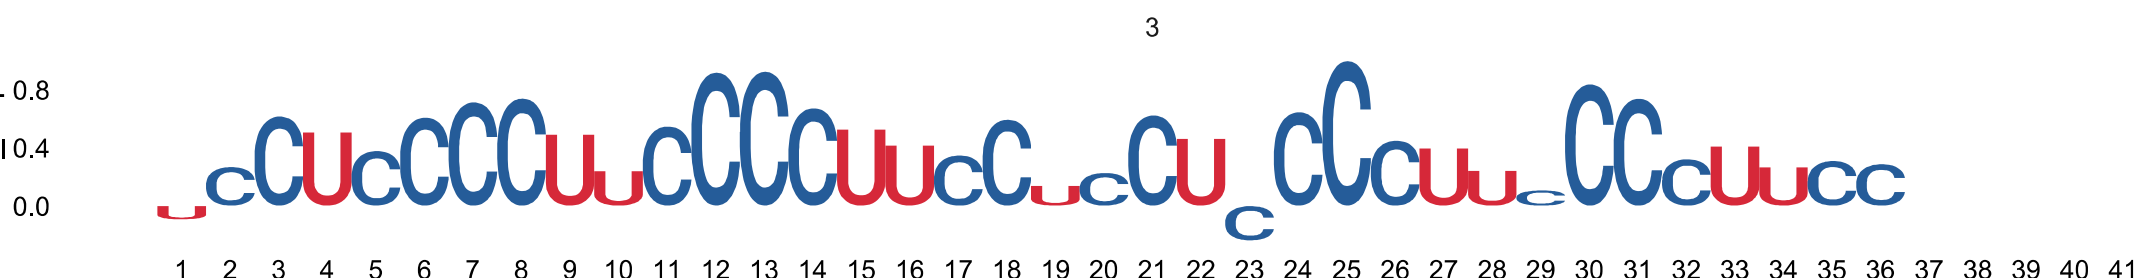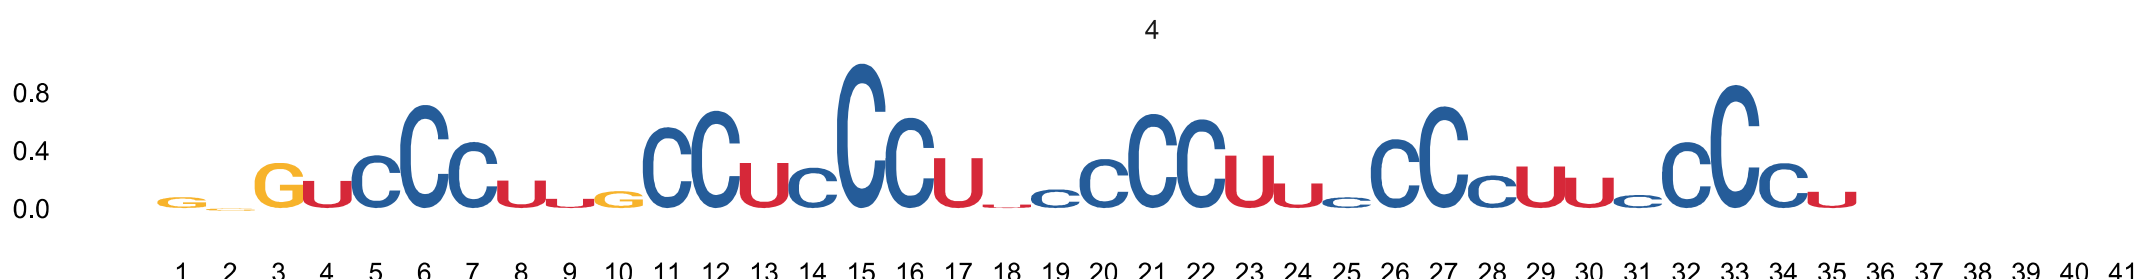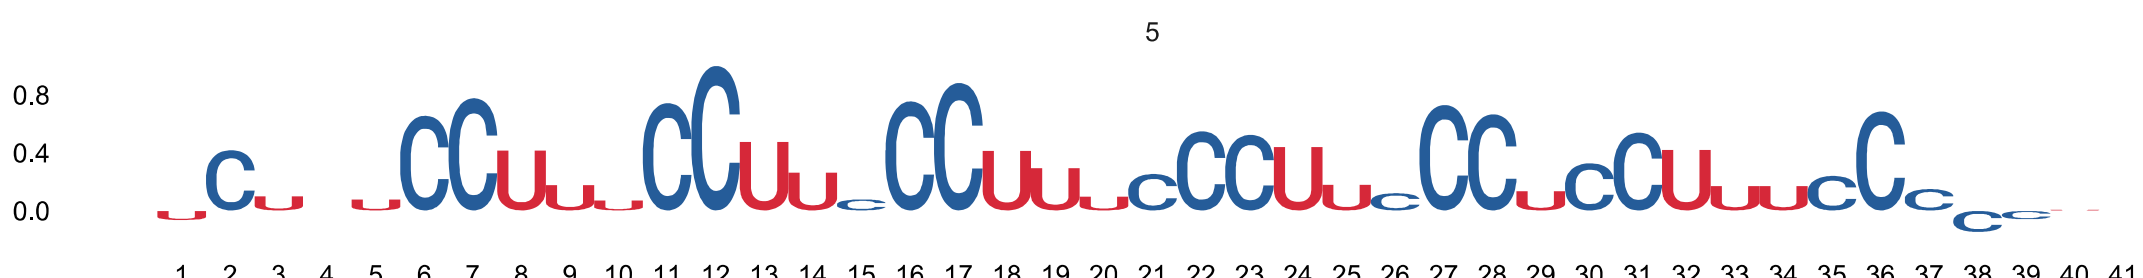

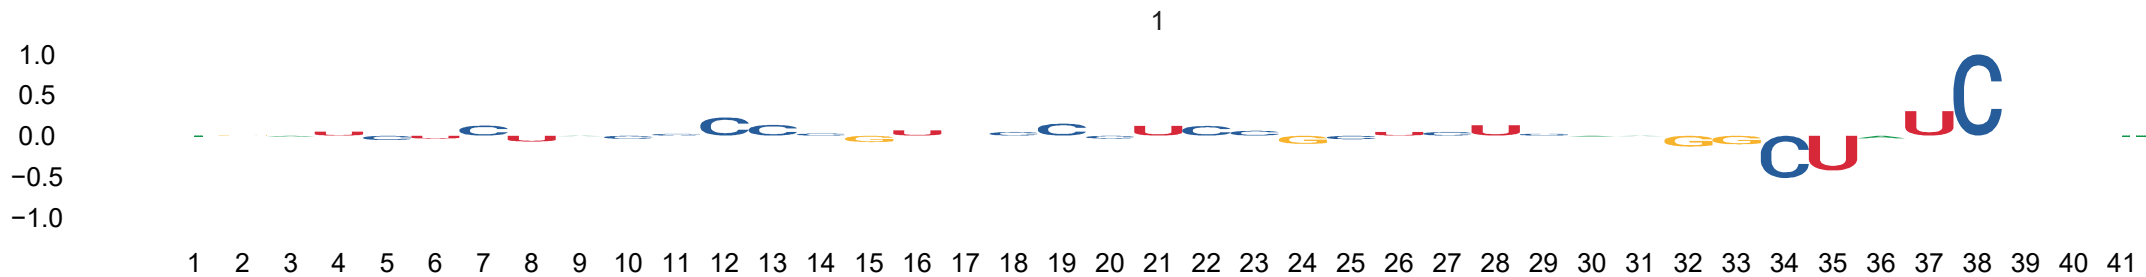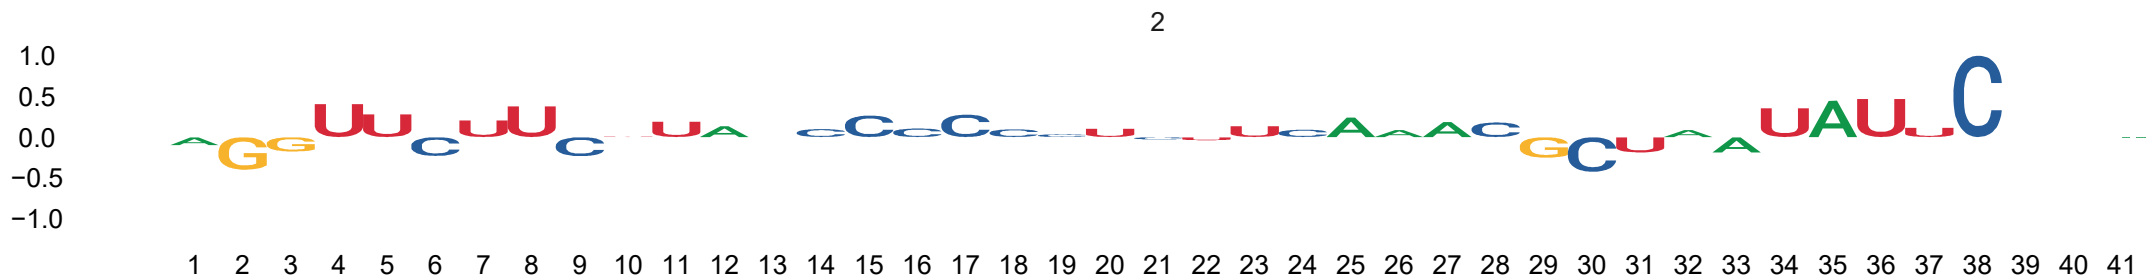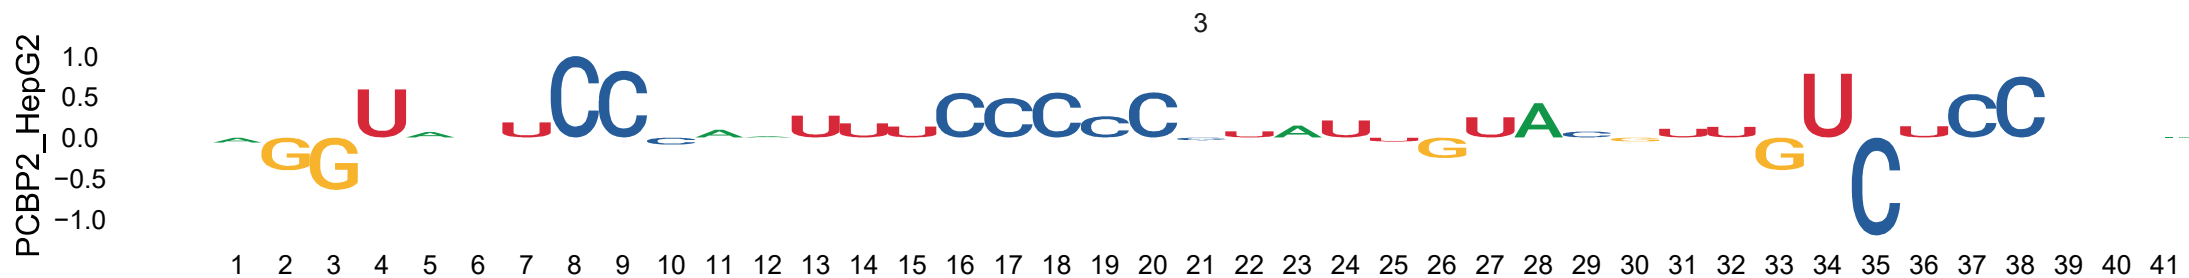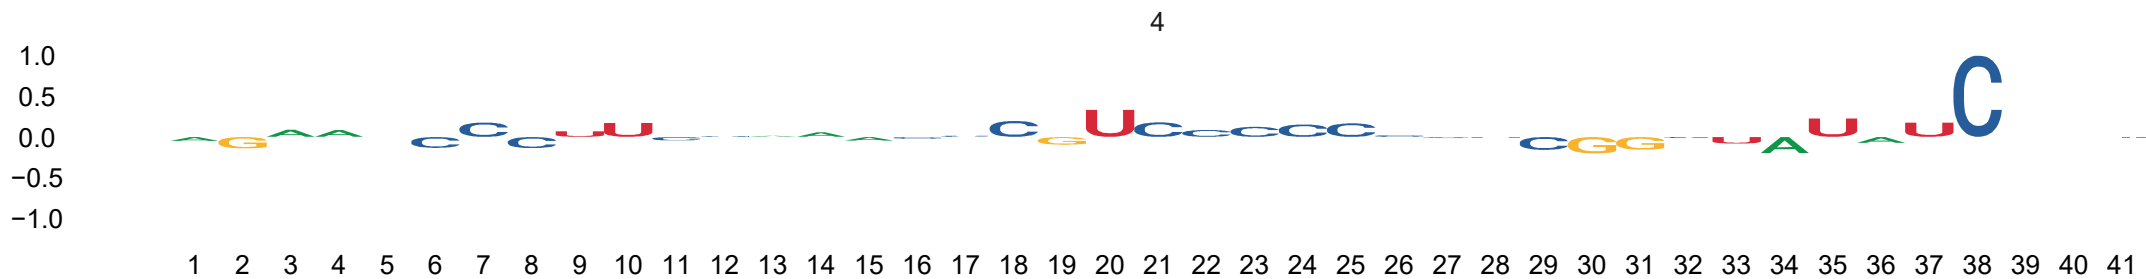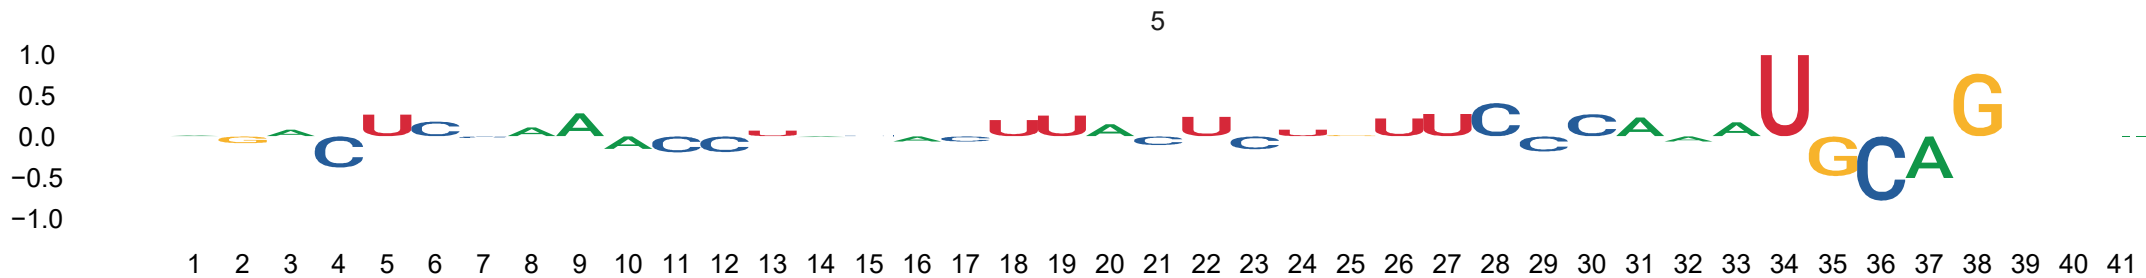

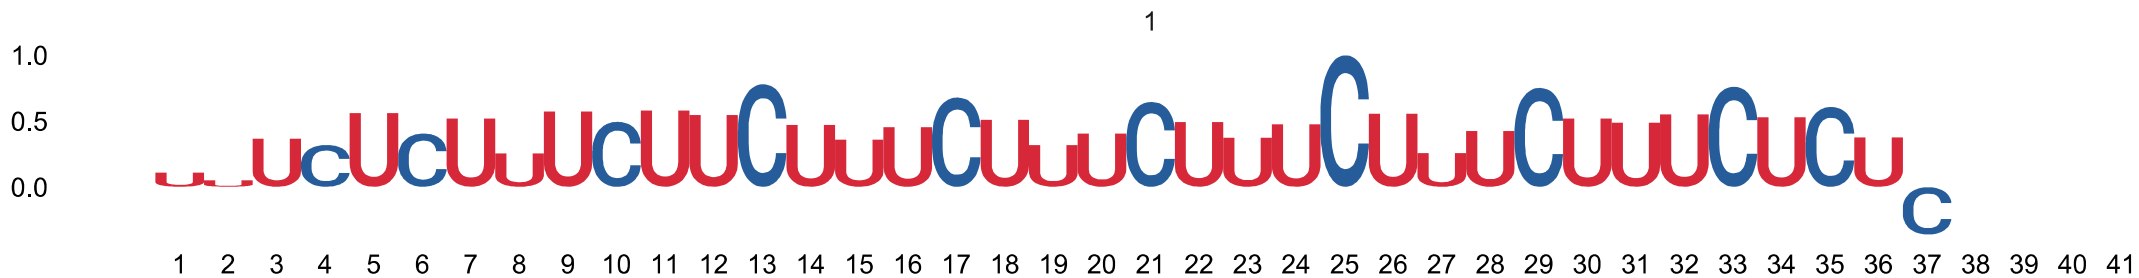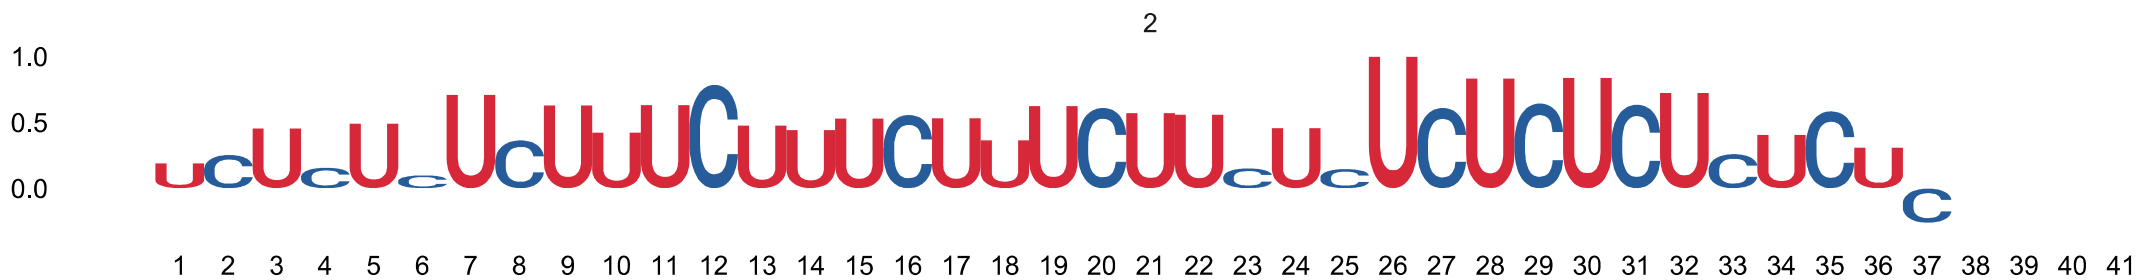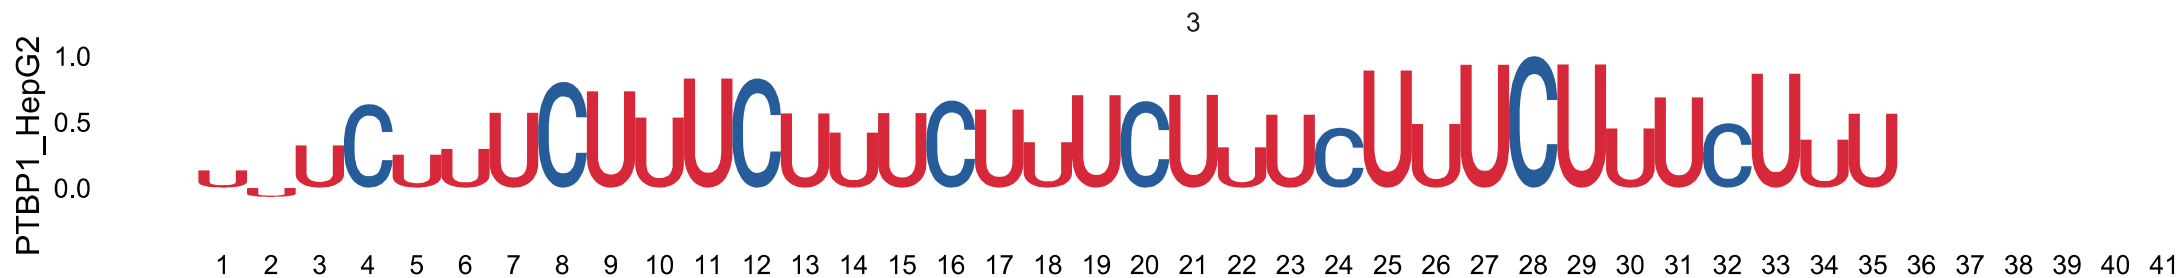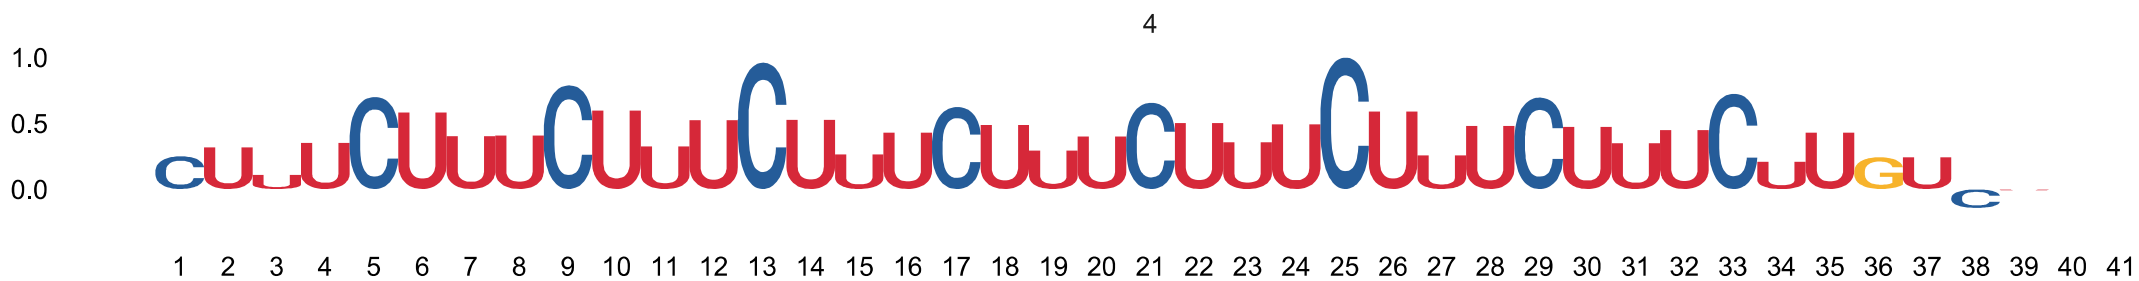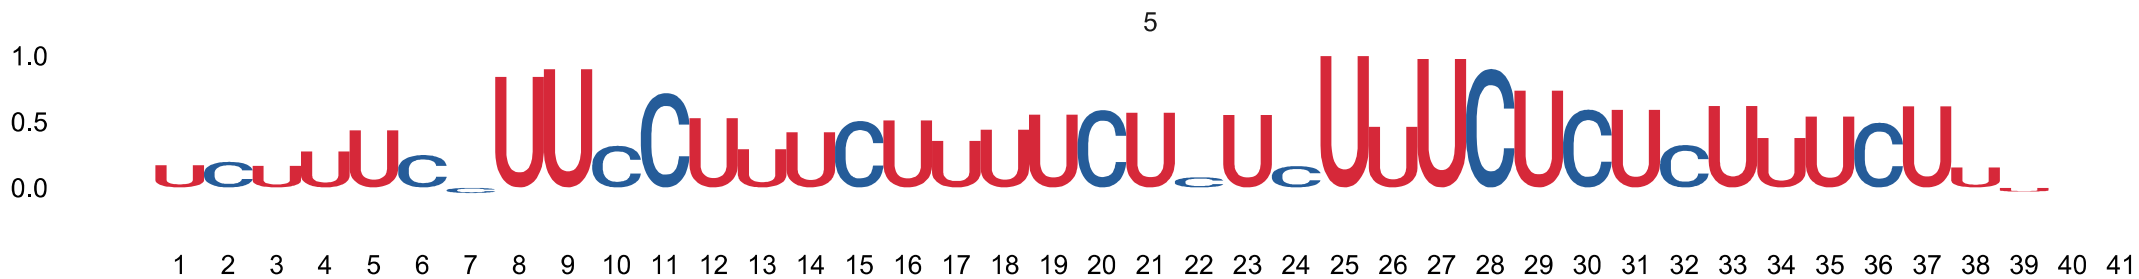

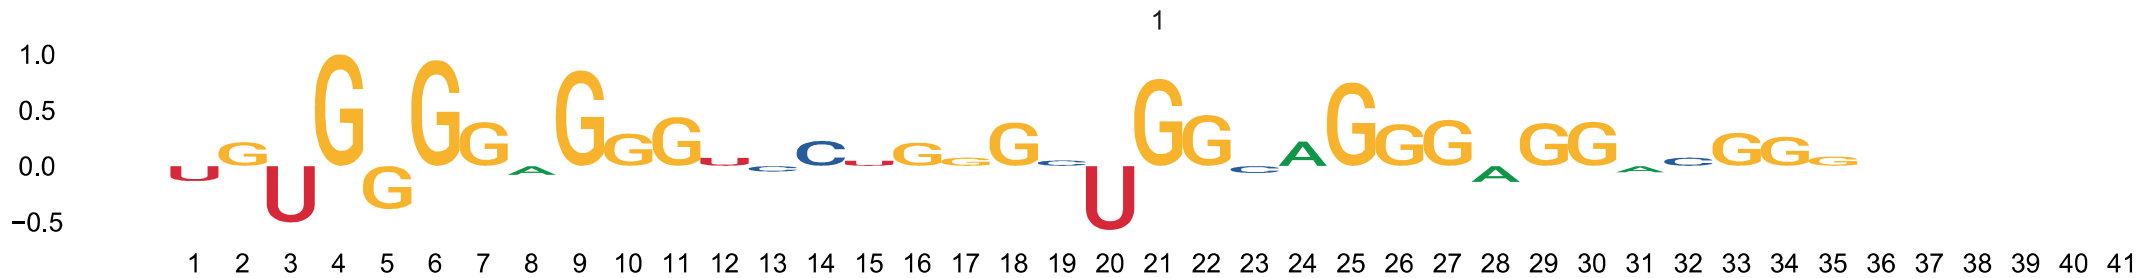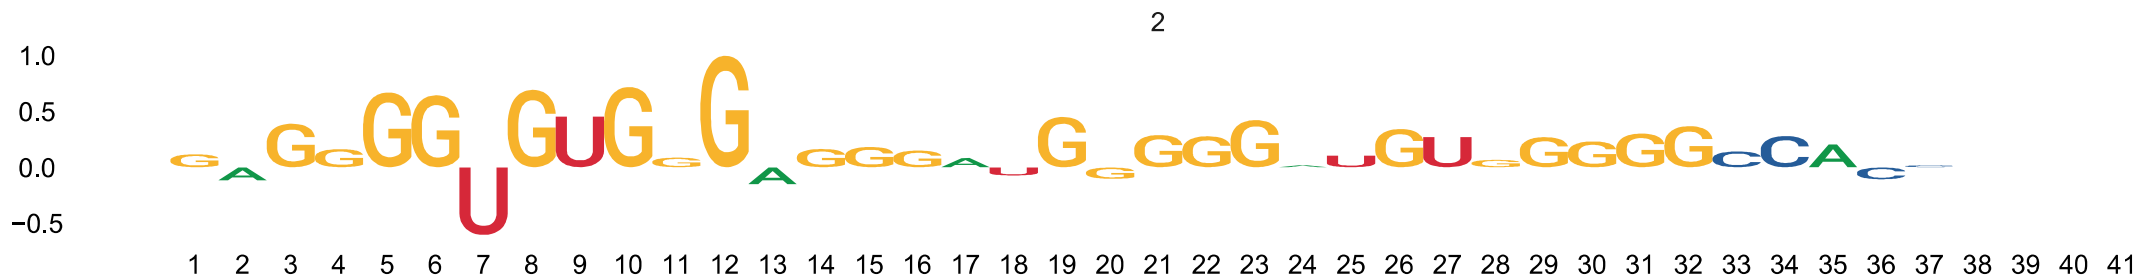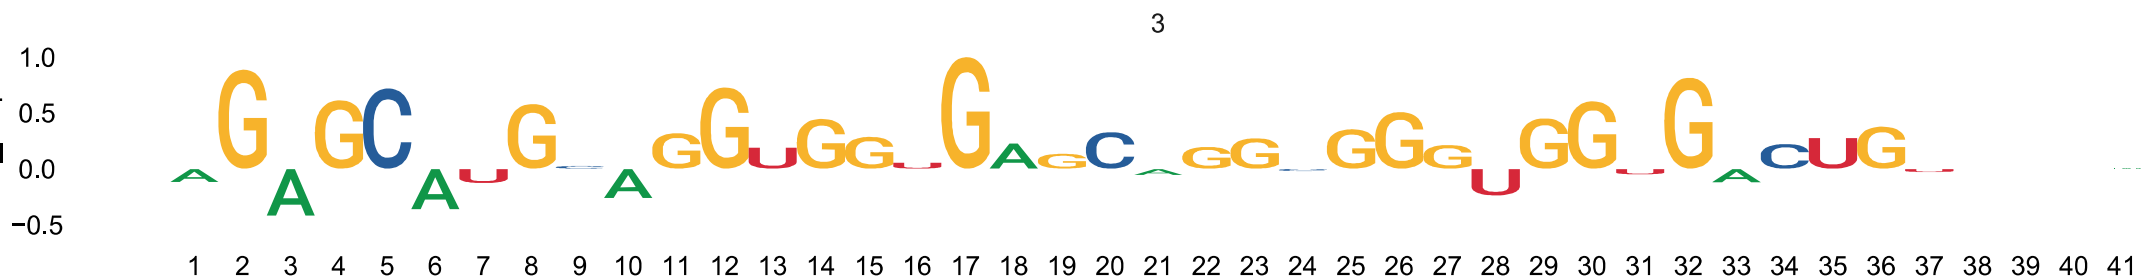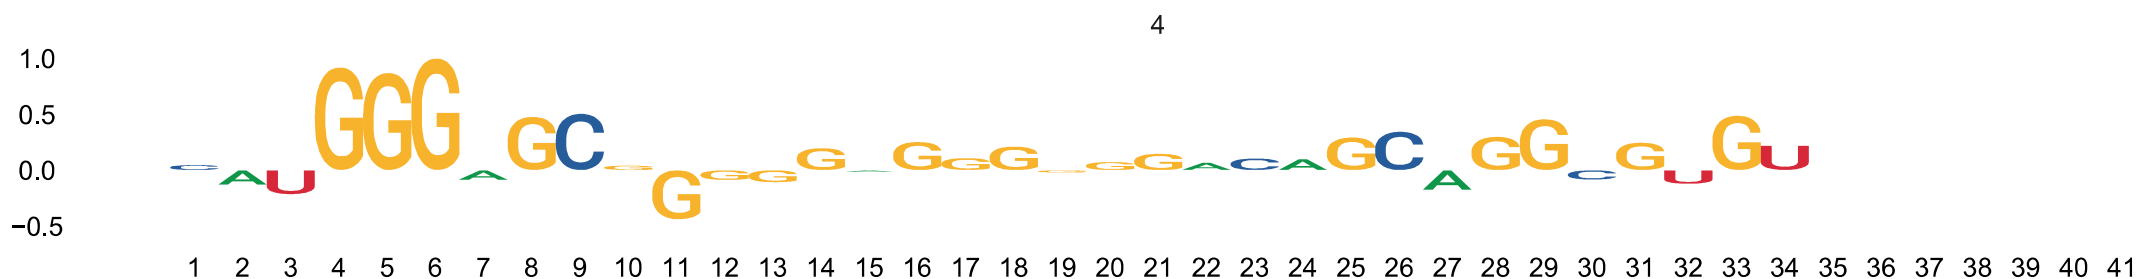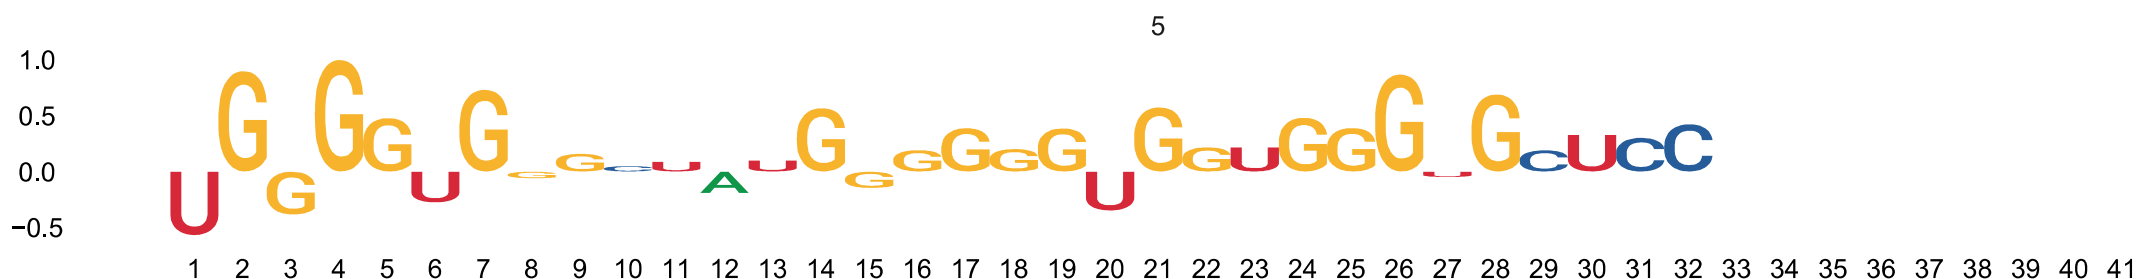



1

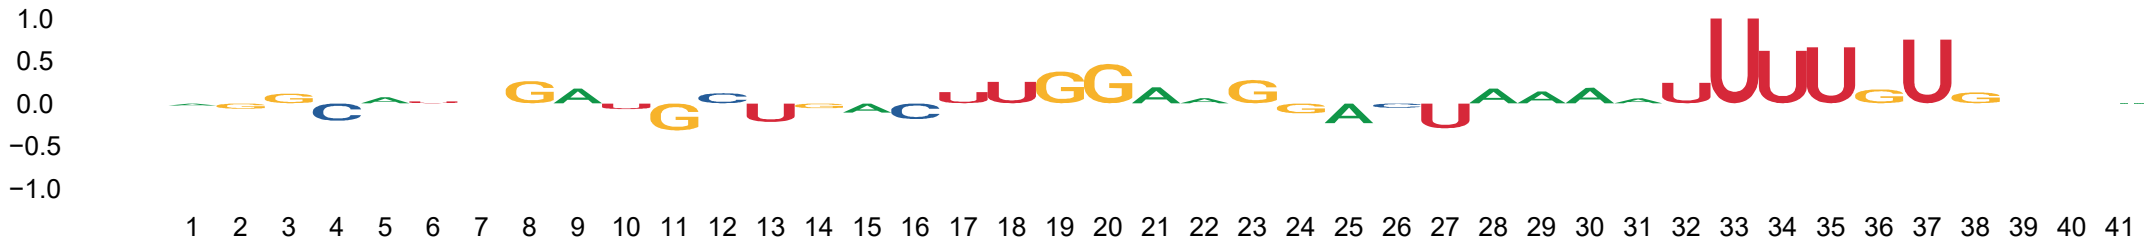

2

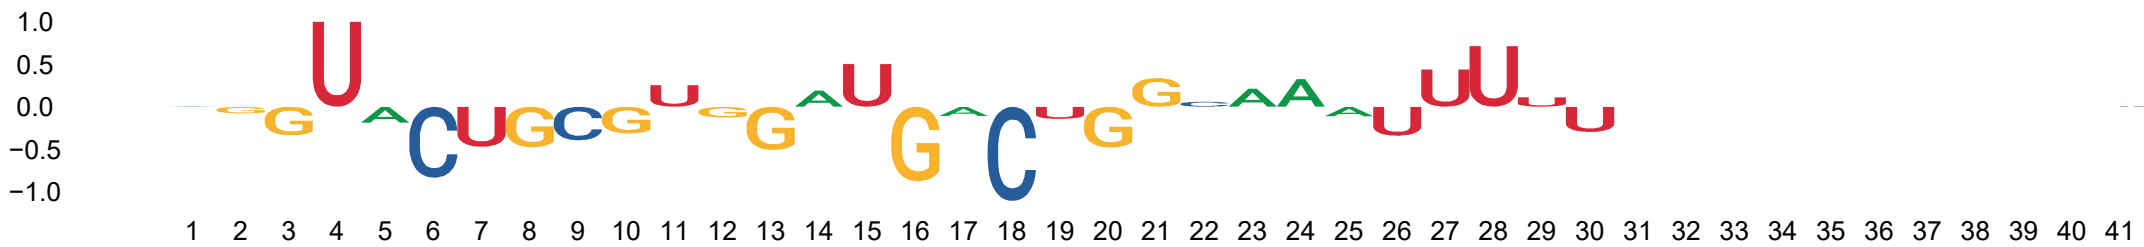

3

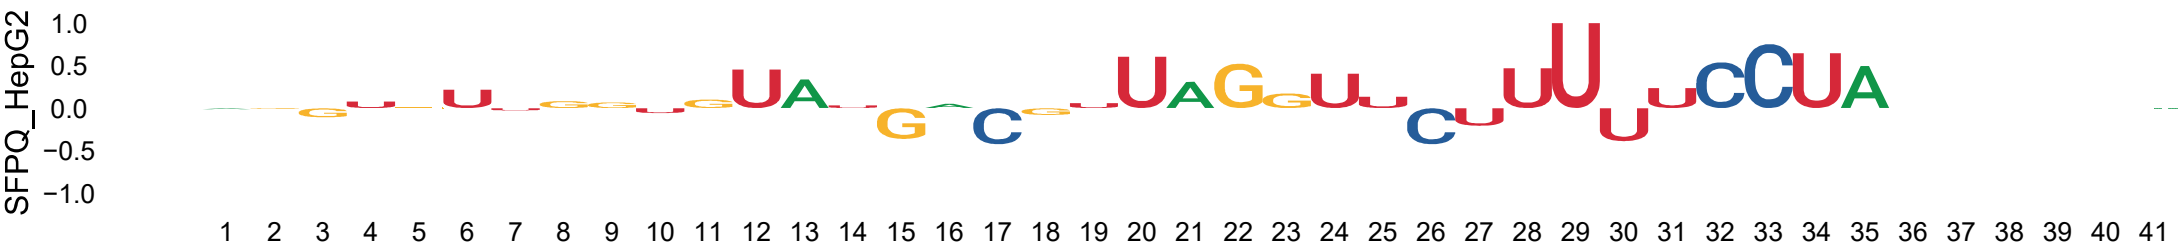

4

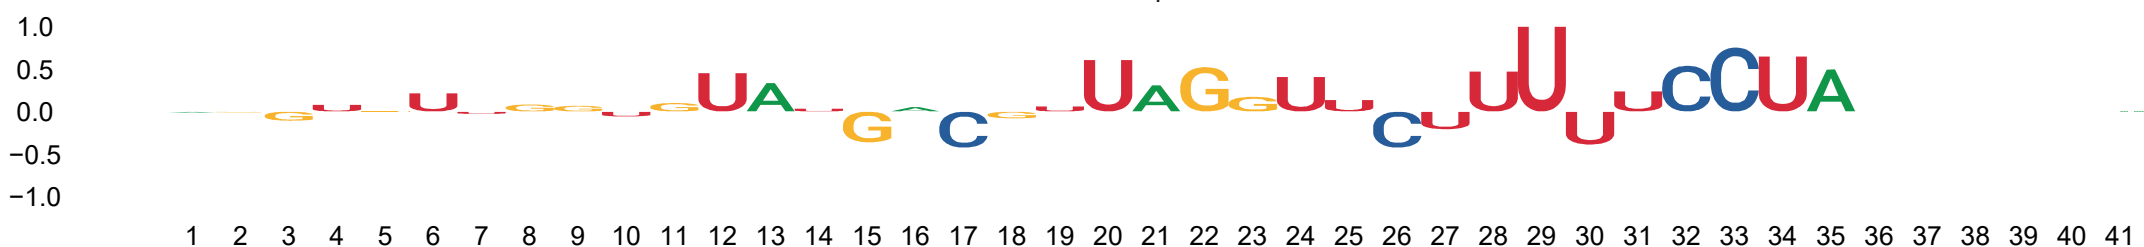

5

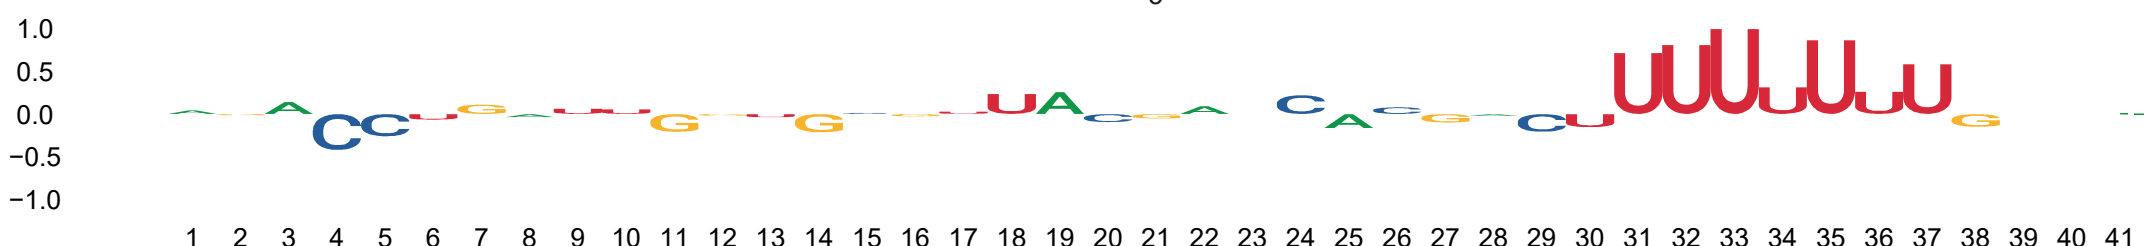

1

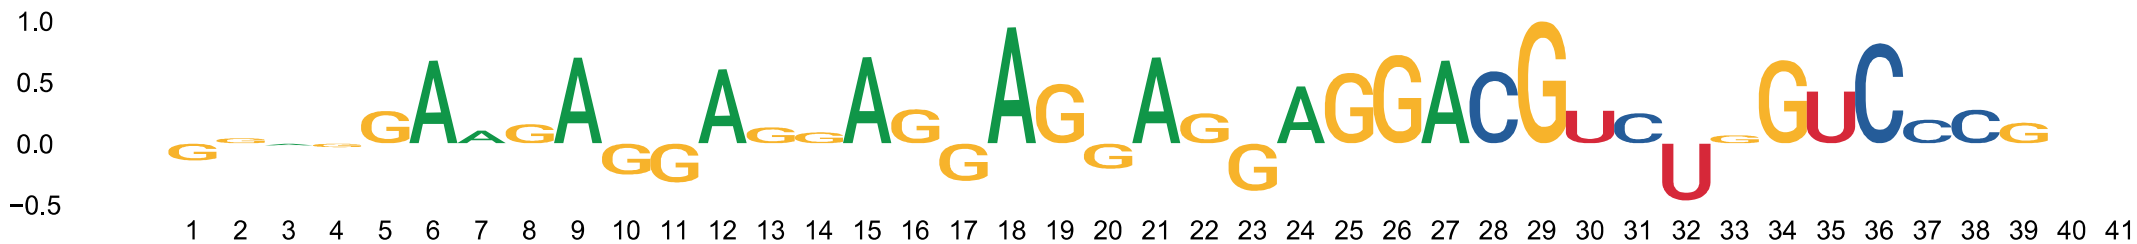

2

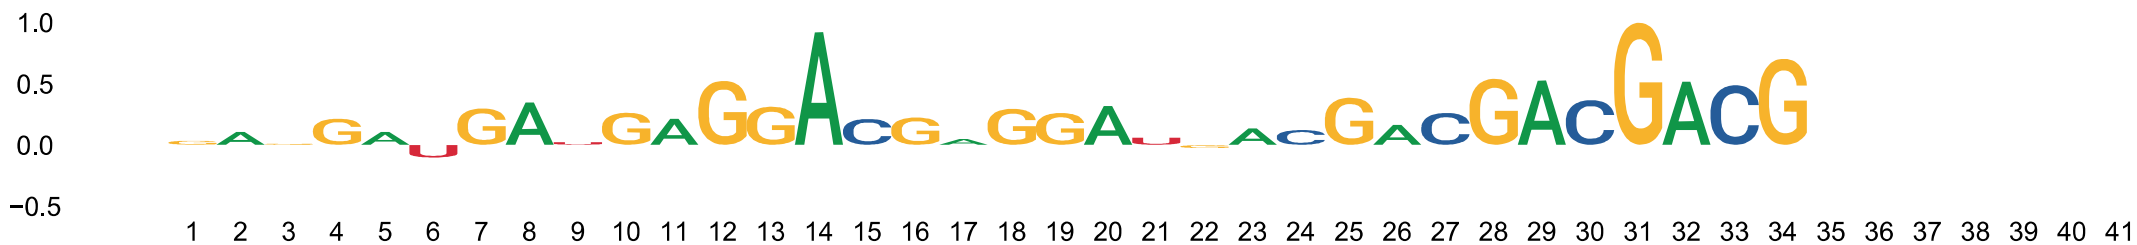

3

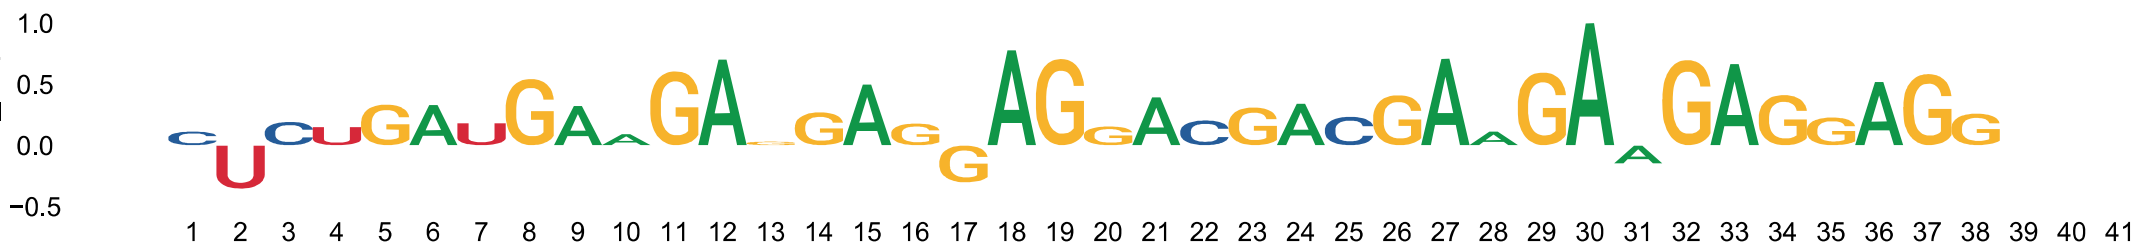

4

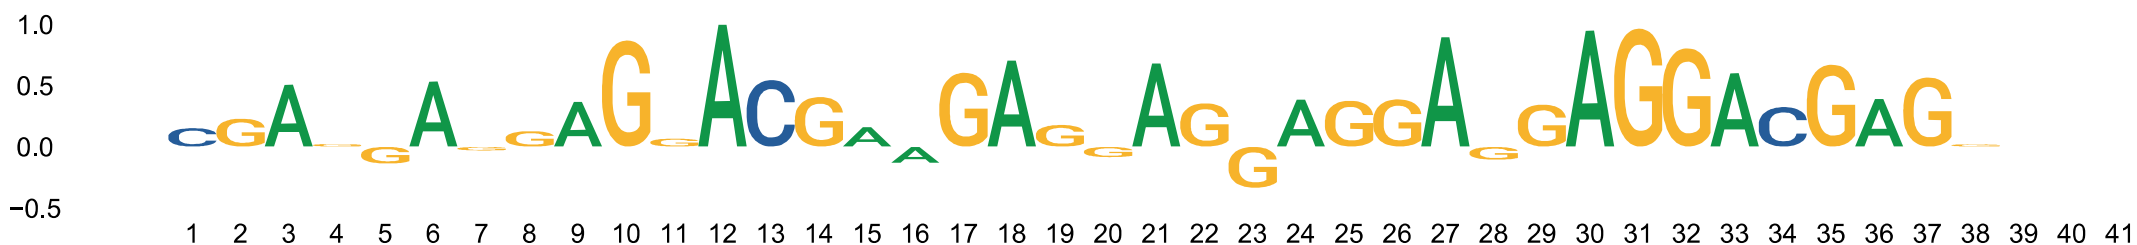

5

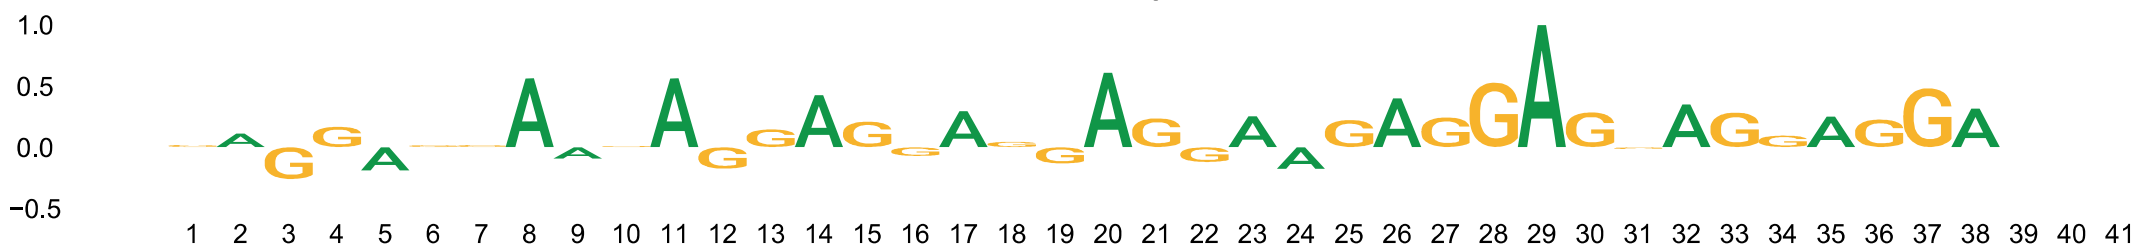

SRSF1\_HepG2

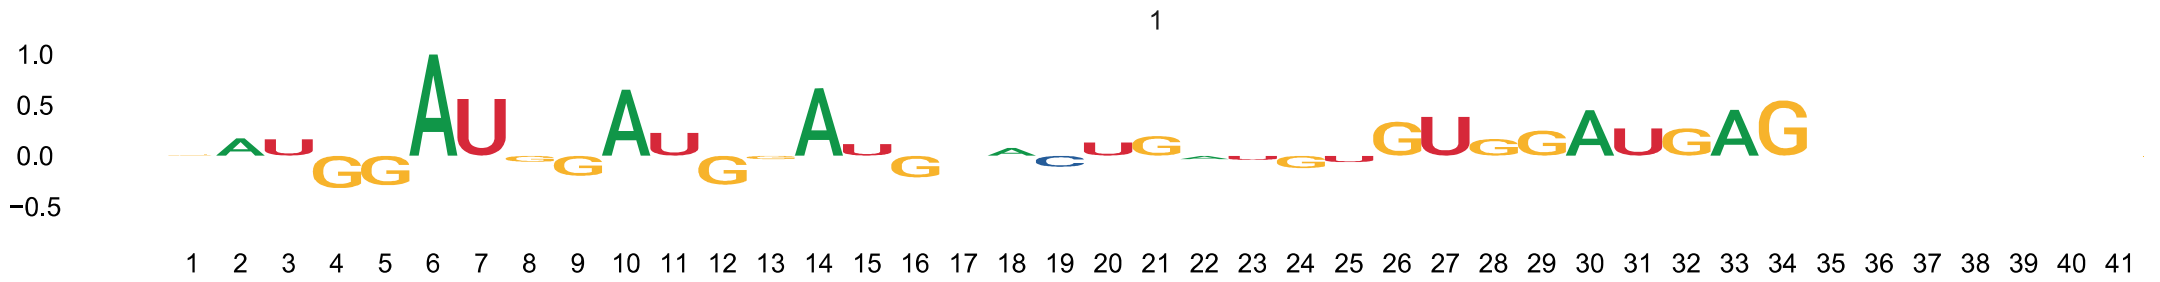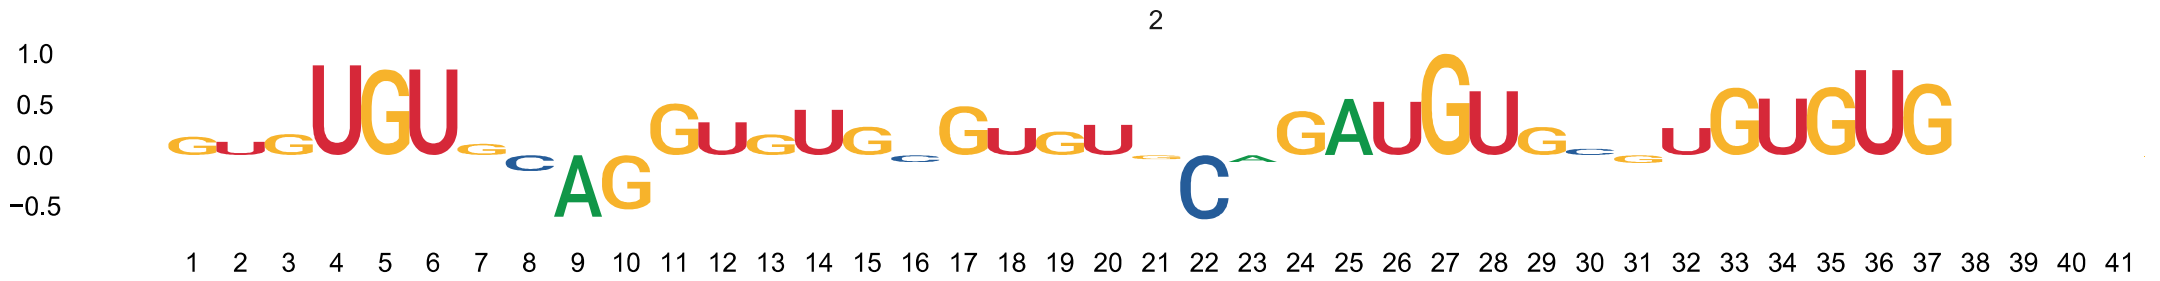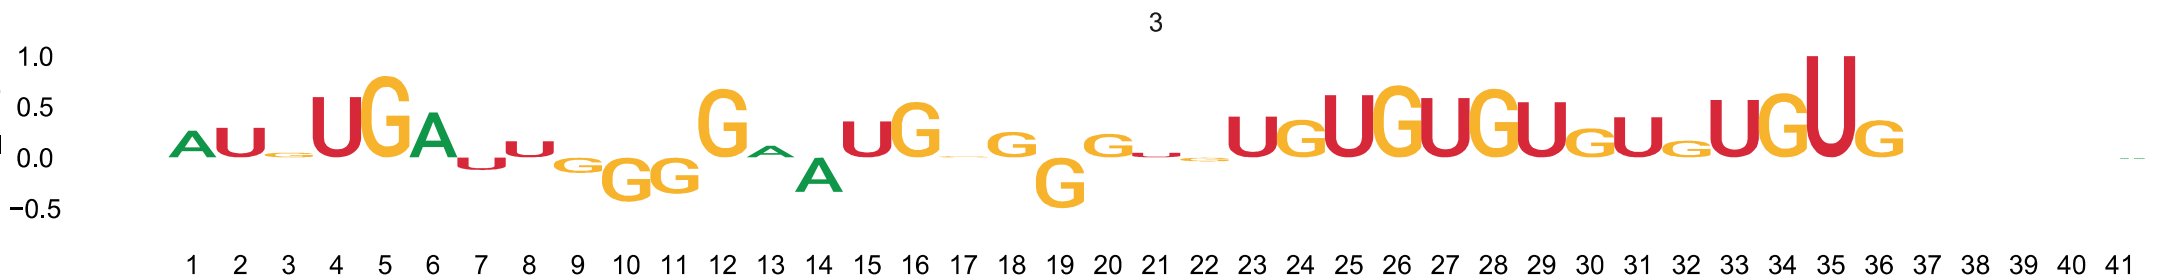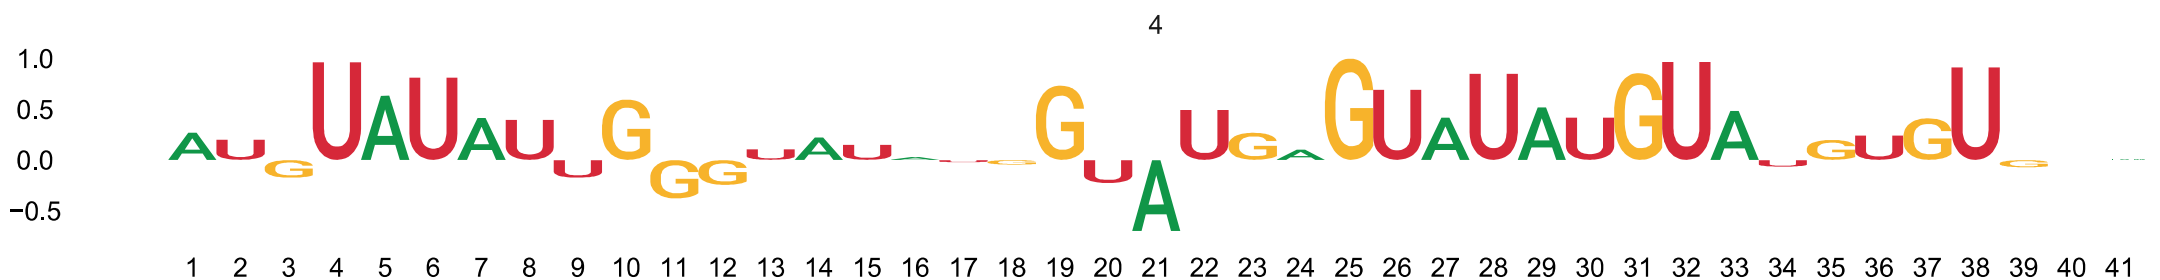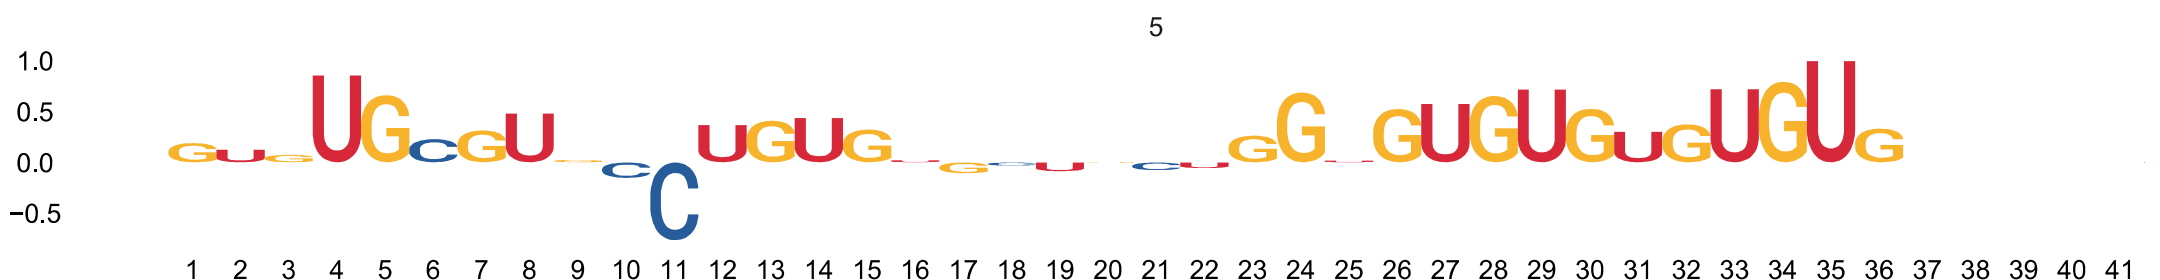

SRSF7\_HepG2

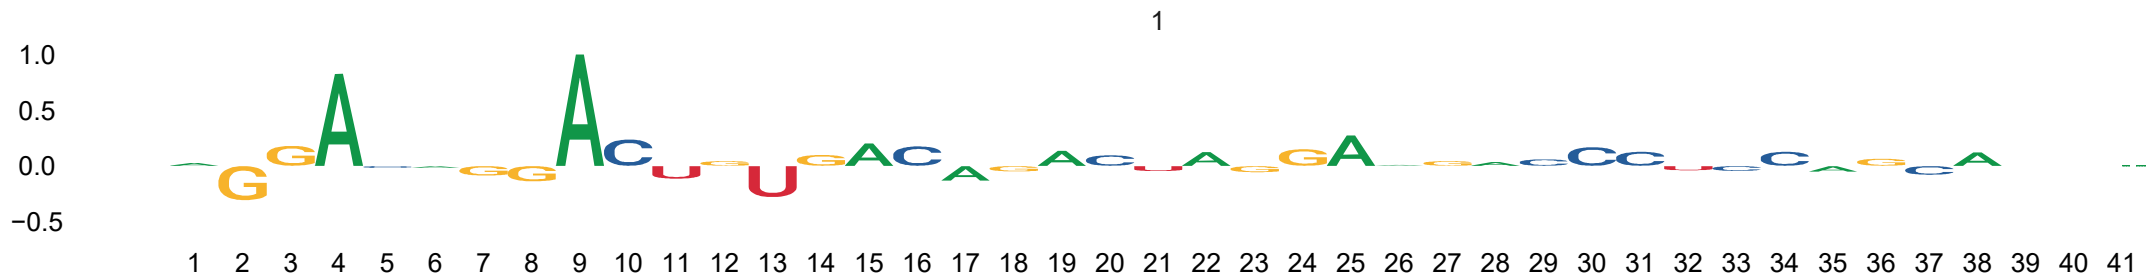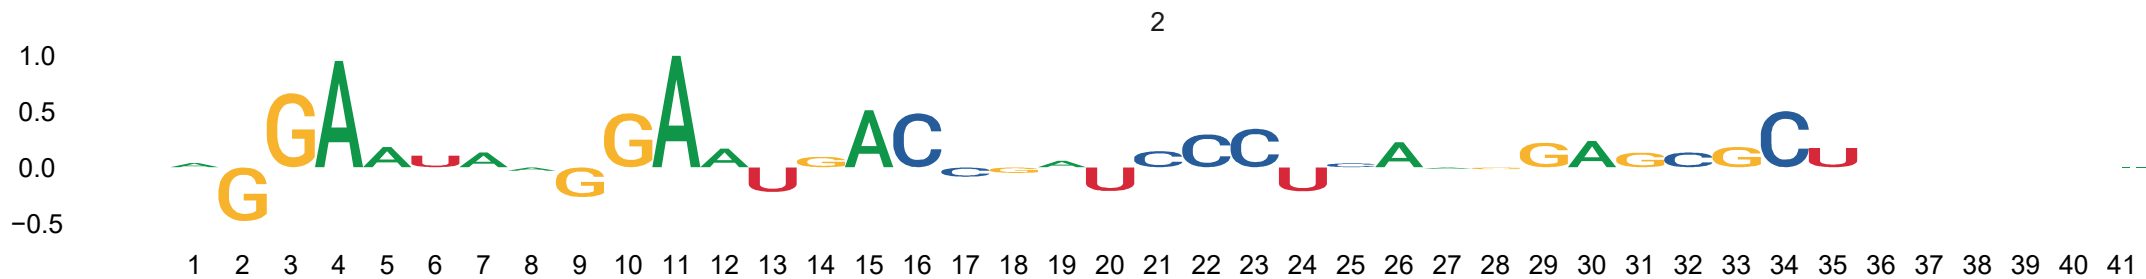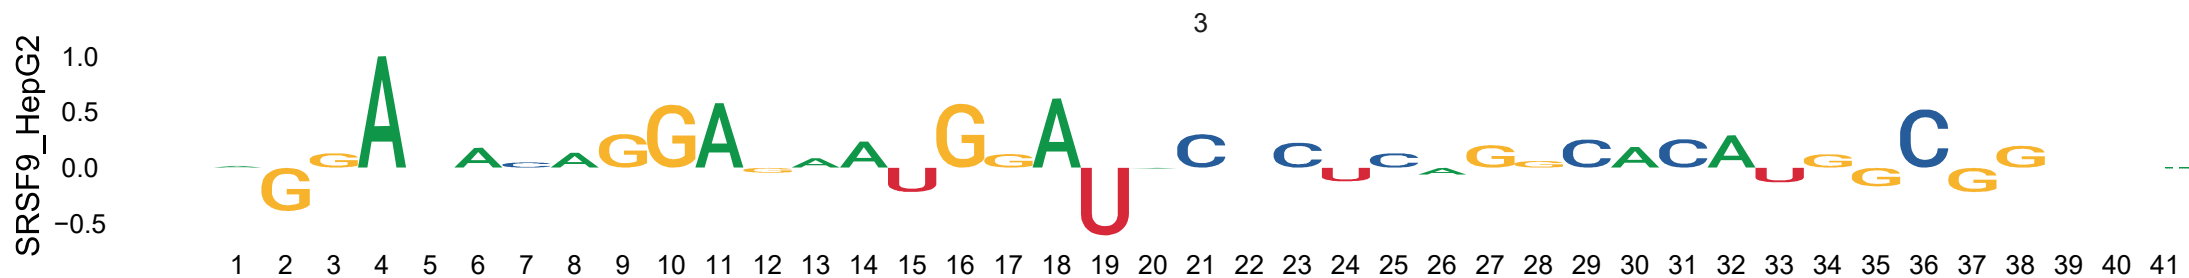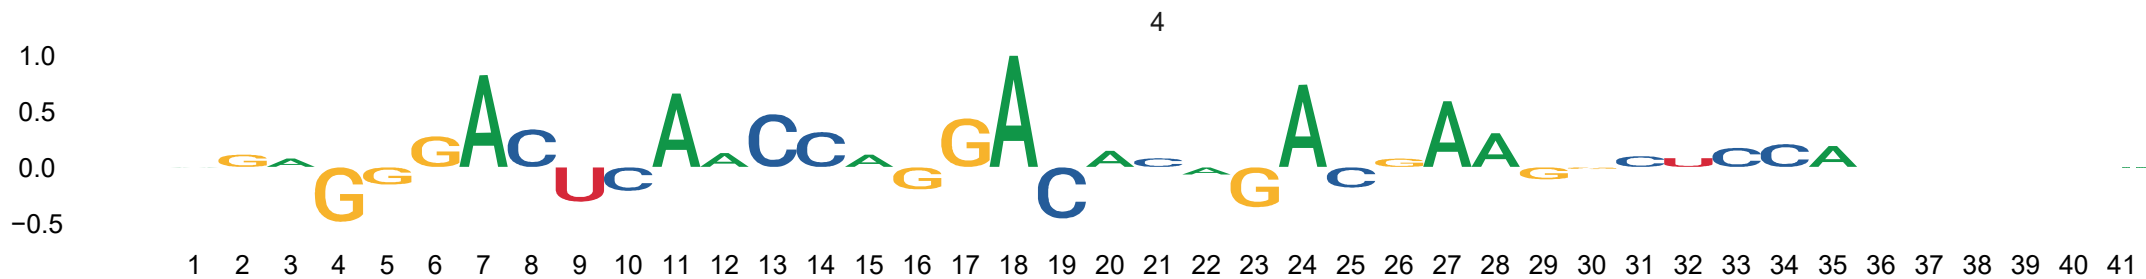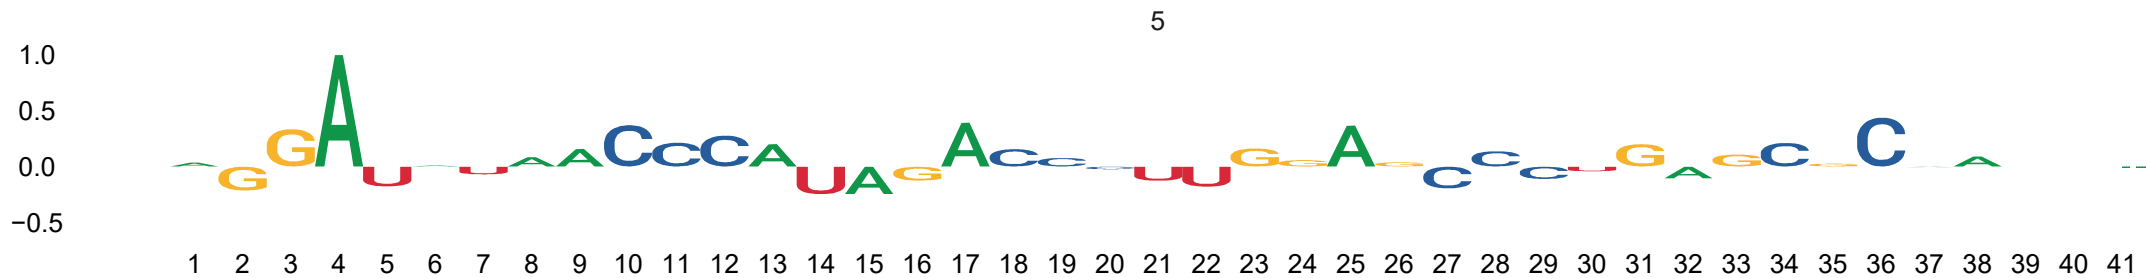

Supplement: pcbi.1009863.s010.pdf [file pcbi.1009863.s010.pdf]
