# Supplementary material for: Inferring RNA-binding protein target preferences using adversarial domain adaptation
Source: PubMed Central journal article supplement (PMC8870515; doi:10.1371/journal.pcbi.1009863), 2022-02-24

Fig S1

**A. Source/Target Network**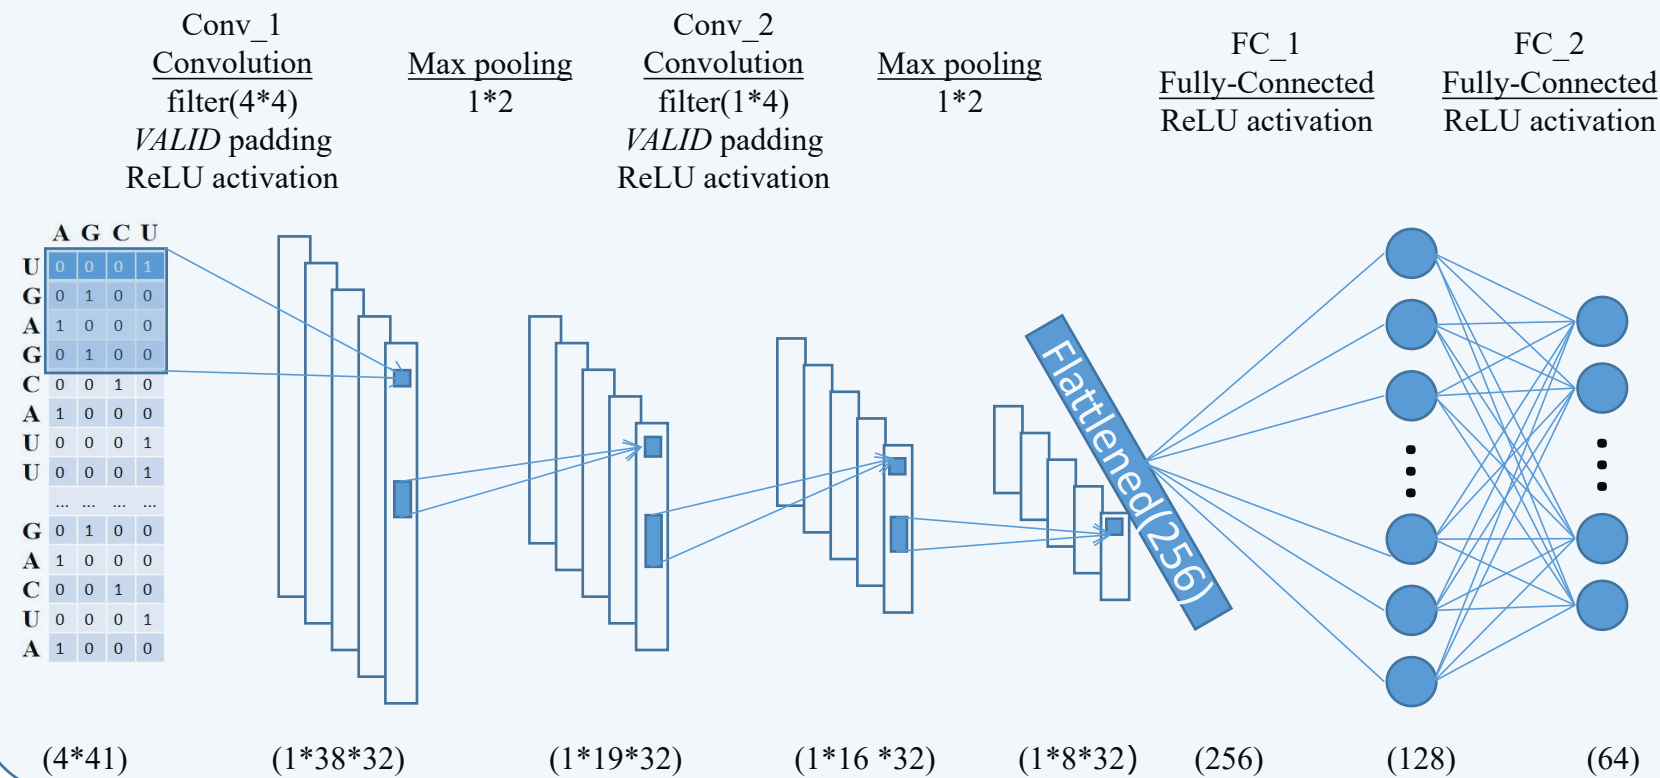**B. Task Predictor**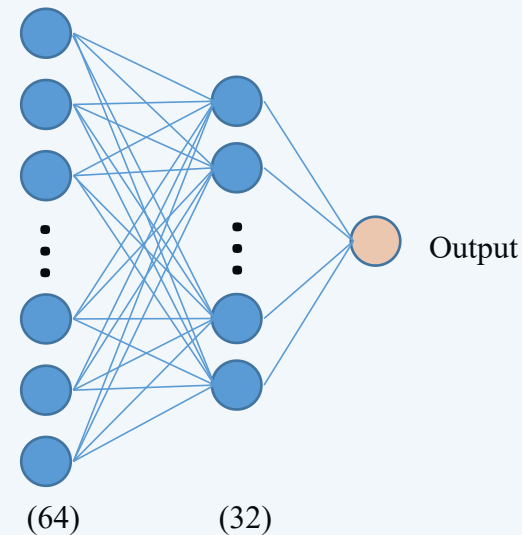**C. Discriminator**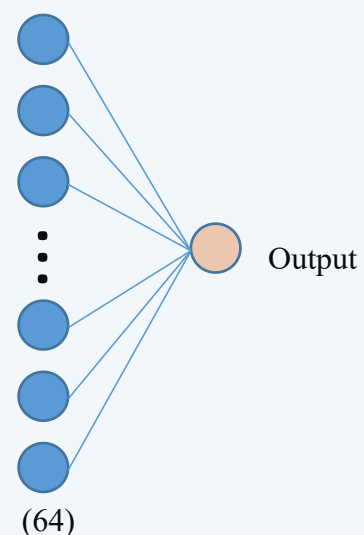

Supplement: pcbi.1009863.s006.pdf [file pcbi.1009863.s006.pdf]
